# Supplementary material for: Ethnobotany in Iturbide, Nuevo León: The Traditional Knowledge on Plants Used in the Semiarid Mountains of Northeastern Mexico
Source: Preprints.org preprint supplement (doi:10.20944/preprints202208.0414.v1), 2022-08-24
Supplement: Supplementary file 1 [file supplementary]

## Article

# Ethnobotany in Iturbide, Nuevo León: The Traditional Knowledge on Plants Used in the Semiarid Mountains of Northeastern Mexico.

Eduardo Estrada-Castillón<sup>1</sup>, José Ángel Villarreal-Quintanilla<sup>2</sup>, Luis Gerardo Cuéllar-Rodríguez<sup>1</sup>, Martí March-Salas<sup>3</sup>, Juan Antonio Encina-Domínguez<sup>2</sup>, Wibke Himmelsbach<sup>1</sup>, María Magdalena Salinas-Rodríguez<sup>4</sup>, Jacqueline Guerra<sup>1</sup>, Mauricio Cotera-Correa<sup>1</sup>, Laura Magdalena Scott-Morales<sup>1</sup>, Rebecca Jane Friesen<sup>5</sup>, Patricio Garza-Zambrano<sup>6</sup>, José Ramón Arévalo-Sierra<sup>7</sup>, Homero Garate-Escamilla<sup>1</sup>, Maritza Gutiérrez-Gutiérrez<sup>1</sup>, and Tania Vianney Gutiérrez-Santillán<sup>1,\*</sup>

**Citation:** Estrada-Castillón, E.; Villarreal-Quintanilla, J.A.; Cuéllar-Rodríguez, L.G.; March-Salas, M.; Encina-Domínguez, J.A.; Himmelsbach, W.; Salinas-Rodríguez, M.M.; Guerra, J.; Cotera-Correa, M.; Scott-Morales, L.M.; Friesen, R.J.; Garza-Zambrano, P.; Arévalo-Sierra, J.R.; Garate-Escamilla, H.; Gutiérrez-Gutiérrez, M.; Gutiérrez-Santillán, T.V. Ethnobotany in Iturbide, Nuevo León: The traditional knowledge on plants used in the semiarid mountains of northeastern Mexico. *Sustainability* 2022, 14, x. <https://doi.org/10.3390/xxxxx>

Academic Editor: Firstname Last-name

Received: date  
Accepted: date  
Published: date

**Publisher's Note:** MDPI stays neutral with regard to jurisdictional claims in published maps and institutional affiliations.

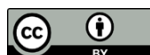

**Copyright:** © 2022 by the authors. Submitted for possible open access publication under the terms and conditions of the Creative Commons Attribution (CC BY) license (<https://creativecommons.org/licenses/by/4.0/>).

- <sup>1</sup> Facultad de Ciencias Forestales, Universidad Autónoma de Nuevo León. Carr. Nacional Linares-Cd. Victoria, km 145, A.P. 41, 6700, Linares, Nuevo León, México; [aeduardoestrada@prodigy.net.com](mailto:aeduardoestrada@prodigy.net.com), [luis.cuellar@uanl.edu.mx](mailto:luis.cuellar@uanl.edu.mx), [waldkauzruft@gmail.com](mailto:waldkauzruft@gmail.com), [guerrajacqueline17@gmail.com](mailto:guerrajacqueline17@gmail.com), [mauricio.cotera@uanl.edu.mx](mailto:mauricio.cotera@uanl.edu.mx), [laura.scottmr@uanl.edu.mx](mailto:laura.scottmr@uanl.edu.mx), [hgaratesc@uanl.edu.mx](mailto:hgaratesc@uanl.edu.mx), [maritza.gutierrez@uanl.mx](mailto:maritza.gutierrez@uanl.mx)
- <sup>2</sup> Departamento de Botánica, Universidad Autónoma Agraria Antonio Narro, C.P. 25315, Buenavista, Saltillo, Coahuila, México; [javillarreal00@hotmail.com](mailto:javillarreal00@hotmail.com), [jaencinad@gmail.com](mailto:jaencinad@gmail.com)
- <sup>3</sup> Plant Evolutionary Ecology, Faculty of Biological Sciences, Goethe University Frankfurt, Max-von-Laue-Str. 13, 60438 Frankfurt am Main, Germany; [martimarchsalas@gmail.com](mailto:martimarchsalas@gmail.com)
- <sup>4</sup> Herbario Jorge Marroquín, Facultad de Ciencias Biológicas, Universidad Autónoma de Nuevo León, Av. Pedro de Alba, Cd. Universitaria, San Nicolás de la Garza, Nuevo León, México; [manesalinas@outlook.com](mailto:manesalinas@outlook.com)
- <sup>5</sup> Elk Island National Park, 54401 Range Rd 203, Fort Saskatchewan, Alberta, Canada; [becky.friesen@gmail.com](mailto:becky.friesen@gmail.com)
- <sup>6</sup> Capital Natural, A.C., Av. Ricardo Margain Zozaya 440, Valle del Campestre, 66265, San Pedro Garza García, Nuevo León, México; [pgarza@capitalnatural.com.mx](mailto:pgarza@capitalnatural.com.mx)
- <sup>7</sup> Departamento de Botánica, Ecología y Fisiología Vegetal, Facultad de Ciencias, Universidad de La Laguna, Islas Canarias, España; [jarevalo@ull.edu.es](mailto:jarevalo@ull.edu.es)

\* Correspondence: [tvgutierrez\\_santillan@yahoo.com.mx](mailto:tvgutierrez_santillan@yahoo.com.mx)

**Abstract:** Iturbide is located in the Northeast of Mexico, it has a rich native and exotic flora, however, there are no ethnobotanical records, therefore, it requires attention in the documentation of traditional knowledge and practices and uses of its botanical resources. In 2021, twelve field trips were carried out, applying 110 semi-structured interviews. Plant samples were collected, identified and deposited in an herbarium. We used the Chi-square test to compare the anthropocentric categories ethnobotanical uses with respect concerning to others reported in Mexico. To determine the cultural importance, three ethnobotanical indices were applied (UVI, ICF and FL). We recorded 250 species with ethnobotanical uses implications associated with 121 genera and 83 families, including 140 native and 110 exotic species. The most common plant families were Asteraceae, Lamiaceae, and Fabaceae. The main categories of uses were: ornamental, medicinal and food. The species with the highest UVI values were *Lepidium peruvianum*, *Ocimum basilicum* and *Rosmarinus officinale* *Salvia rosamrinus*. The multifunctionality of the native and exotic flora demonstrates the extensive knowledge associated with botanical resources. Examples, the role of ornamental plants, with a direct impact on human well-being, the resilience of healers and traditional inhabitants by using different species for the treatment of various ailments. or indigenous edible plants in the daily diet.

**Keywords:** ethnobotanical indices, ethnobotanical uses, native and exotic species, local community, semi-structured interviews, natural resources in mountains areas, traditional knowledge and management, ornamental plants.

## 1. Introduction

Worldwide, ethnobotany is a discipline with extensive contributions from its beginnings to the present, with work on all continents, highlighting remote regions and different indigenous groups. It is surprising how much ethnobotanical information is available. E.g. a study in the Kathua region of the Himalayas describes the knowledge and use of 121 plant species by various indigenous groups, Duggars, Paharis, Punjabis and Gujjars; who, furthermore, share their ancestral knowledge [1]. These results are strengthened by other research in the same region of Kupwara, Himalayas; where the use of a wide diversity of medicinal plant species is documented, in addition, the transmission of traditional medical knowledge directly from the elderly to the young is highlighted [2]. Another recently explored region is Pakistan in the Shiwalik Range, where its population depends directly on wild flora for their livelihood [3]. Same subsistence case for the Nauka (language in danger of extinction), settled in the Bering Strait, Russia; who, in addition to depending on wild plants, were forced to change their ancestral knowledge and practices due to armed conflicts [4].

Other areas of the planet and their diverse cultures contribute with spectacular ethnobotanical works, e.g. the groups originating in Australia, the Bunganditj, use a wide variety of medicinal plants, in addition, they collaborate with researchers to design protocols for prospecting the use of their medicine [5]. One of the zones with the greatest ethnobotanical records is the Mapuche region, Patagonia, Argentina; where 505 medicinal flora species are reported; highlighting an interesting mix of native and exotic species [6]. Another of the most diverse regions of the planet is the Amazon, where 274 species of medicinal native plants are reported for a single community in the Brazilian Region [7].

Relating the richness and diversity of worldwide ethnobotany, we can say that Mexico is one of the countries with a deep ethnobotanical tradition, that is, the human groups established in the different ecoregions have a broad-developed a wide perception, knowledge and use of plant resources [81,92]. The Mexican ethnobotanical documentation estimates the knowledge and use-exploitation of between 5,000 and 7,000 plant species, among which a wide range of native and introduced species stand out, using different parts of them, many with strong cultural and multifunctional roots [92].

Mexican ethnobotany as well as in other regions of the world, reflects socio-ecological patterns of a complex socio-cultural dimension, highlighting the forms of transmission of traditional ecological knowledge (TEK) between different generations [103], inter-ethnic and intra-ethnic differences [114], gender [125], between ecosystems and in biodiversity [136], including environmental changes [147], as well as the anthropocentric characterization of use-utilization [158], the complex systems of traditional medicine and food [92]. These socio-ecological patterns consist of a set of local knowledge and practices specific to each cultural group, defined as: Tradicional Ecological Knowledge (TEK; [16,17]). The TEK is integrated into three main conceptual fields, a) perception=kosmos (set of beliefs associated with plants, e.g. ceremonial and ritual uses), b) cognitive=corpus (sets of knowledge about plant resources, e.g. flock nomenclature, knowledge about biological and ecological aspects), and c) practical=praxis (set of utilization and/or exploitation

practices, e.g. categories of use, domestication, [18]). Ethnobotanical studies in the country have contributed to the development and consolidation of global ethnobotanical knowledge, e.g. Hunn [19], with the Tzeltal Indians, where he proposes one of the bases for the study of traditional classification. Later, he reaffirms his work, studying the lifestyles of the Zapotec Indians of San Juan Gbee, where he documents more than 700 names of plants in the indigenous language [20]. Currently, Novel ethnobotanical research is currently continuing, e.g. Nabhan and collaborators [21], it has been have shown that the role that plants play in a socio-ecosystem, and its relevance is so relevant that they provide benefits for human health in the face of climatic stress; during the monsoons (rains in the Sonoran Desert, where the Comcaac indigenous people lives) when terpenes are released from the desert plants, in which more than 60 species have been identified with 115 biogenic volatile oils, contribute to human health by improving sleep patterns, regulating emotional hormones, improving digestion and reducing depression and anxiety; preventing oxidative stress diseases [219].

The distribution of indigenous groups in Mexico is concentrated in the central, southern, and south-southeastern areas, mainly, where there is a high diversity of geoforms, climates, ecosystems, and a high biological diversity; the established indigenous groups have a profound knowledge of their biocultural diversity and their ethnobotanical resources [8]. Some indigenous groups settled in the northern region of the country, grouped in the Northwestern area. Therefore, in the Northeast region, there are only the Kipapo and Negros Mascogo settlements (migrants from the United States settled in the mid-1800s [22]). In general, the North of Mexico is characterized by being a wide extension of arid and semi-arid zones, forming one of the most diverse desert regions on the planet [23], due to its local environmental heterogeneity, mainly in the Northeast region; in this area, there are hundreds of mestizo rural communities, which, like the indigenous communities, have a deep knowledge of their ethnobotanical biocultural diversity [13,24-27]. This is due in part to the fact that rural populations tend to live more isolated, using natural resources of their surroundings as medicine, food, ornamental, firewood, or domestic tools [24-27].

In the north of Mexico, the established indigenous groups are much smaller than the rest of the country, settling mainly in the northwestern area, with the Kipapo and Mascogo settlements in the northeastern region [10]. However, there are hundreds of mestizo rural communities that have a deep knowledge of ethnobotanical biocultural diversity [6].

The ethnobotany in the north of the country and in particular particularly in the northeast area-zone is as relevant as that documented in other regions, and even in indigenous areas, even when comparing different types of ecosystems where the richness of species is varied [136]. Unfortunately, this knowledge is at risk due to socio-cultural factors such as migration [2844], and lack of interest in younger generations, contrary to what has been documented for some indigenous people, where the transmission of ethnobotanical TEK occurs directly from the elderly to the young [2]. Other factors are associated with changes in economic systems [2942]; to socio-ecological factors, such as

changes in ~~local-traditional~~ medicine ~~practices and local and~~ food systems, ~~so it is~~ necessary to safeguard important taxa as part of the biocultural heritage food [30]. In addition, there are changes in agroecological systems, where there is a threat and loss of related wild crops [31]. The degradation of ethnobotanical TEK is even associated with ~~and even to~~ environmental changes [13] and loss of biological diversity [32–14]. A ~~brake-respite~~ in the face of the notable loss of ethnobotanical biocultural wealth is given through the documentation and local revaluation of knowledge and practices of plants, ~~as in many~~ parts of the world [1–7], where women play a very important role [33–15], ~~as well as the~~ new generations [103]; ~~as well as, linking communities with the academic sector,~~ generating regulation and bioprospecting protocols [5].

~~In general, the relief of Mexico is among the most rugged on the planet [16]. This particular orography is one of the factors that confers the existence of diverse and unique flora in many parts of country. The northern region ecologically it is characterized by large extensions of arid and semi-arid zones, with heterogeneous mosaics of high floristic diversity [16]. These peculiarities make good use of local plants for ethnobotanical uses [17]. This is due in part to the fact that rural populations tend to live more isolated, using natural resources of their surroundings as medicine, food, ornamental, firewood, or domestic tools [2,3,8].~~

Geographically the state of Nuevo León, is characterized by its extensive lowland, high plains and mountains that, in some cases, can reach up to 3,600 meters above sea level [18], where the local population is mestizo [19]. Our study area, Iturbide, is a small municipality located in the semiarid mountains in the southern reaches of the state of Nuevo Leon [20] with a landscape comprised of 85% rugged surface and 15% flat areas [18]. The two main vegetation types found in the municipality of Iturbide are semiarid scrubland and oak-pine forest, both of them hosting a very rich flora with high levels of endemism. The Sierra Madre Oriental (state of Nuevo Leon) contains almost 269 endemic plant species [21,22]. Almost 60 of these species are considered exclusive of the municipality of Galeana, adjacent to Iturbide. Among these species, it highlights some with high levels of endemism such as Asteraceae (*Ageratina*, *Erigeron*, and *Verbesina*), Cactaceae (*Mammillaria* and *Turbinicarpus*), and Fabaceae (*Dalea*). Most of the native and exotic flora in this area is widely used by the local community for medicinal, ornamental, food, forage and construction purposes [17].

According to the 2010 National Population and Housing Census, approximately 3,600 people inhabit Iturbide Municipality, with 95% living in the town of Iturbide and the remainder in surrounding rural areas. On average, half of the residents of Iturbide Municipality are male and half are female [20]. The primary local language is Spanish. The main economic activities in Iturbide are agriculture and livestock, which highlights the relevance of the study of natural resources in this area. The main crops are corn, wheat and oats, as well as fruit harvesting, principally apples, plums, apricots, quince and peaches [20]. Local artisans produce wooden furniture, embroidery and other handmade products, thereby using natural resources for its creations. The federal government offers subsidized

~~training for the development of technical skills such as baking, sewing, carpentry and blacksmithing. Additionally, there is federal financial support for disabled people. All this shows the relevance of ethnobotany for the economical development of Iturbide. However, in Iturbide, there are relatively few inhabitants aged 17–25 years. This is because the young people of Iturbide have begun to emigrate to larger cities and regions with higher access to education and diverse employment opportunities that offer higher salaries. In this sense, ethnobotanical knowledge could be endangered due to this loss of young population, which evidence the importance of its research.~~

The main objectives of this ethnobotanical study are: a) to know the diversity of ~~plant species flora taxa in the study area with ethnobotanical potential for ethnobotanical use;~~ b) to compare the diversity of plants with ethnobotanical ~~uses implications in Iturbide with those that occurring reported~~ in other regions ~~in of~~ northeastern Mexico; c) ~~to know the to document the~~ knowledge and ~~traditional~~ uses of ~~the local community on their native but also their and~~ exotic flora; and d) ~~to compile the empirical analyze the traditional medical knowledge of local plant species, of Iturbide and their uses by means of their forms of administration and parts used; ethnobotanical through the application of ethnobotanical indices: Informant Consensus Factor (ICF), Use Value Index (UVI), and Fidelity Index (FI) in order to assess the most valuable plants for ethnobotanical use of the local community.~~ All this would help preserve the ethnobotanical knowledge ~~and traditional practices of the plant species-taxa used in this area by their community, facilitating environmental education and the word of education for~~ the sustainable development of Iturbide, in the face of the increasing loss of ~~ecosystems, a low economy in the area and migration of the~~ young population.

## 2. Materials and Methods

### 2.1. Study site

In general, the relief of Mexico is among the most rugged on the planet [46]. This particular orography is one of the factors that confers the existence of diverse and unique flora in many parts of the country. The northern region ecologically it is characterized by large extensions of arid and semi-arid zones, with heterogeneous mosaics of high floristic diversity [34,46].

Geographically the state of Nuevo León, is characterized by its extensive lowland, high plains and mountains that, in some cases, can reach up to 3,600 meters above sea level [35], where the local population is mestizo [36]. Our study area, Iturbide, is a small municipality located in the semiarid mountains in the southern reaches of the state of Nuevo León [36] with a landscape comprised of 85% rugged surface and 15% flat areas. The two main vegetation types found in the municipality of Iturbide are semiarid scrubland and oak-pine forest, both of them hosting a very rich flora with high levels of endemism. The Sierra Madre Oriental (state of Nuevo León) contains almost 269 endemic plant species [37]. Almost 60 of these species are considered exclusive of the municipality of Galeana, adjacent to Iturbide. Among these species, it highlights some with high levels of endemism, belonging to the families, Asteraceae (*Ageratina* Spach, *Erigeron* L., 1753, and



*Verbesina* L.), Cactaceae (*Mammillaria* Haw. and *Turbinicarpus* (Backeb.) Buxb.&Backeb.), and Fabaceae (Genera *Dalea* Ulbr. [38]). Most of the native and exotic flora in this area is widely used by the local community for medicinal, ornamental, food, forage and construction purposes [13, 24–27].

According to the 2010 National Population and Housing Census, approximately 3,600 people inhabit Iturbide Municipality, with 95% living in the town of Iturbide and the remainder in surrounding rural areas. On average, half of the residents of Iturbide Municipality are male and half are female [36]. The primary local language is Spanish. The main economic activities in Iturbide are agriculture and livestock, which highlights the relevance of the study of natural resources in this area. The main crops are corn, wheat and oats, as well as fruit harvesting, principally apples, plums, apricots, quince and peaches [36]. Local artisans produce wooden furniture, embroidery and other handmade products, thereby using natural resources for their creations. The federal government offers subsidized training for the development of technical skills such as baking, sewing, carpentry and blacksmithing. Additionally, there is federal financial support for disabled people. However, in Iturbide, there are relatively few inhabitants aged 17–25 years. This is because the young people of Iturbide have begun to emigrate to larger cities and regions with higher access to education and diverse employment opportunities that offer higher salaries [36].

The origin of its population is related to the establishment of cattle ranches in 1800, its current population is totally mestizo, proud to belong to the "northern culture". Education levels are high compared to other municipalities in the entity, there is basic, upper secondary and higher education, highlighting the School of Forest Sciences and the Astronomical Observatory of the Autonomous University of Nuevo León. In recent years, tourism has been promoted as an economic alternative, mainly associated with ecotourism due to its natural and scenic beauty.

Iturbide is located in south-central Nuevo Leon, 24°23' N 99°59' W (Figure 1 and Figure 2a). It is placed in the Sierra Madre Oriental and it is comprised of mountains, extensive valleys and canyons, as well as plateaus above 1,200 m altitude. Iturbide is located in the dry part of the mountains on the leeward side. Its climate has two variants: at lower elevations (1,200 m) it is semi-warm, while at higher elevations (2,400 m), the climate is cold, temperate and subhumid. The annual precipitation ranges from 300 mm to 950 mm, with a mean precipitation of 705 mm. The driest months are from December to March; the rainiest months are from July to September. The average annual temperature ranges between 12° to 18° C, with the hottest months being April and May and the coldest from November to January [38,21]. There are two permanent rivers in the municipality of Iturbide: The San Antonio River, which crosses the municipality from North to South, and the La Muralla River, located at the extreme North. The highest parts of the area with a temperate climate are covered by oak and oak-pine forest, while the driest parts shelter microphyllous scrublands [38,39,16,17].

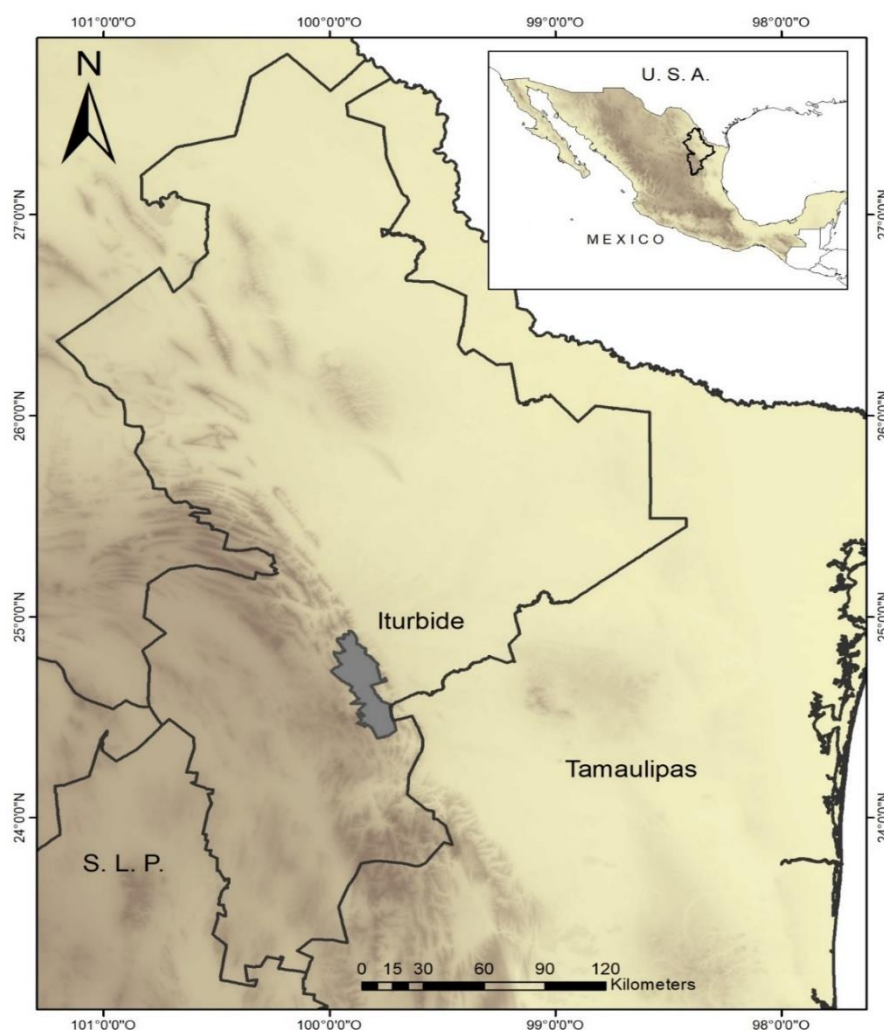

**Figure 1.** Location of the study area, Iturbide, Nueva León, Mexico.

## 2.2. Field work and interviews

A total of twelve field trips were made for plant identification and collection. Two previous exploratory visits were made in June 2021. The first was held to explore the plant communities adjacent to Iturbide and collect plant specimens of the native flora, representative of the area, and the second one to interview people (see below) regarding local plants and their uses. We obtained the permission of local authorities to collect plants in public areas and talk with private property owners for the same purpose [136]. From July to December 2021, 12 field trips for plant species collection were carried out. All species recorded were photographed in-order-to create an ethnobotanical database containing all information and data gathered. The identification of plant specimens was based on the study of the flora of the state of Nuevo León along with monographs of plant families and genera distributed in this area [2238,39]. When possible, the interviewed individuals accompanied us on field trips to identify species *in situ*. All collected and

identified specimens were stored at the CFNL herbarium [23] of the Faculty of Forest Sciences, Autonomous University of Nuevo León. The collection number belongs to Eduardo Estrada (EE), and the identified species were corroborated with herbarium specimens [40].

Based on ethnobotanical studies previously carried out in the state of Nuevo León, we focused our interview on housewives, shepherds, bricklayers, elementary teachers, business owners, midwives, and healers older than 30 years [24]. In this study, the ages of the interviewees ranged from 32 to 84 years. Each interviewee had lived continuously in the area for at least 20 years. To maximize data collection and allow interviewees to speak freely, interviews were semi-structured [41]. Four questions were asked to all interviewed: 1) What is the name of the plant? 2) What are the uses you know of this plant? 3) What parts of the plant are utilized (root, stem, leaf, inflorescence, flower, fruit)? and 4) How is the product/utensil prepared (raw, cooked, roasted, ground)? [42–43]. All interviews were conducted with the prior informed consent of each of the informants (<http://ethnobiology.net/codeofethics/>; [42]). During the interviews, we showed pictures of the regional plant species found to additionally confirm species identification by local people (ethnographic technique of visual stimuli [43]). All interviews were recorded in Spanish. In Figure 2b and 2c, we can observe the work team and the relationship that was established with the informants to obtain the ethnographic information.

### 2.3. Data analysis

To compare the number of known plant species in Iturbide with that of other northeastern regions of Mexico (Nuevo León, Coahuila, Baja California, Puebla, and Michoacán), we carried out Chi-square tests using PAST software [28,29,44,45]. The chi-square test is used by means of contingency tables to examine the relationship between two or more categorical, non-numerical variables. It is also used to explore the distribution of a categorical variable among different samples [44,28]. This test works with frequencies (observed and expected), and its calculation is based on the degrees of freedom and the level of significance to determine which hypothesis is accepted (the null or the alternate). The null hypothesis is rejected when the number of known plant species at other sites is similar to that of Iturbide ( $p < 0.05$ ). In order to quantitatively analyze the ethnobotanical information collected, three indices were applied: 1) Use Value Index (UVI [13,30]; 2) the informant consensus factor (ICF [46,31]), and 3) Fidelity Level (FL [47,32]). these commonly used in the ethnobotanical research [1,2,13].

The UVI quantifies the local importance of each of the species and is calculated as  $UVI = \sum U_i / n$ , where  $U_i$  = the number of uses mentioned by each informant for a given species, and  $n$  = the total number of informants [33]. The IFC measures the relative importance of the different medicinal species for each category of use and utilized is calculated as  $IFC = n_{ur} - n_t / n_{ur} - 1$ , where  $n_{ur}$  = number of uses mentioned, and  $n_t$  = number of species used in each category. Plants that are effective in treating certain diseases will have higher IFC values. The fidelity level (FL) estimates the relative importance of each medicinal species based on the degree of consensus among informants in a category of



~~useexploitation~~. High FL values indicate ~~that the the specific~~ medicinal species ~~to cure a~~ ~~disease, based on the frequency of mention used to cure an illness is widely used~~ for that purpose. The fidelity level is calculated as  $FL(\%) = Ip/Iu$  (100), where  $Ip$ = number of informants who independently indicated the use of a plant for the same ~~disease~~ particular ~~illness~~;  $Iu$ = number of informants who mentioned the species for any illness. ~~within a category of use~~

### 3. Results and Discussion

#### 3.1. Taxa diversity, origin and life forms

A total of 250 taxa with ethnobotanical importance from 121 genera and 83 families, were recorded in this study (Table 1), of which are 140 native and 110 introduced (Appendix A). The diversity of native species is mediated by the prominent changes in relief in the study area, which plays a pivotal role in the physiognomy and composition of plant communities [38] and leads to contrasting vegetation patterns between northern and southern areas [37]; while the diversity of introduced taxa is associated with anthropocentric needs [25-27]. Table 2 shows contrasting physiognomic vegetation among northeastern, northwestern, central and southern Mexico, where ethnobotanical works have been carried out: these sites are characterized by heterogenous scrublands and oak-pine forests. However, relatively similar vegetation was found in northwestern (Baja California, [48]) and southern Mexico, as, for instance, in the Monarch Butterfly Biosphere Reserve (Michoacán, [49]).

Our results affirm that rural mestizo communities also have a deep ethnobotanical tradition, compared to works carried out in inhospitable regions and with different indigenous groups. e.g. Shigh and collaborators [1] report 121 species, 105 genera, and 53 families in the Himalayas. Silva et al. [7] report 274 ethnobotanical taxa used exclusively in traditional medicine for inhabitants of the Brazilian Amazon. However, a greater effort is still needed in the ethnobotanical documentation of extensive rural mestizo areas, to compare data such as those reported for the Mapuche in Patagonia (505 species of medicinal and edible flora, [6]).

The difference in plant biocultural diversity among the above mentioned, regions was significant at every taxonomic level: at the family level ( $X^2_{d.f.=7} = 24.23$ ,  $p < 0.001$ ), genus level ( $X^2_{d.f.=7} = 103.25$ ,  $p < 0.001$ ), and species level  $X^2_{d.f.=7} = 133.60$ ,  $p < 0.001$ ). Regions with heterogeneous vegetation communities (Iturbide, Cumbres de Monterrey National Park (CMNP, [2634]), Rayones [2735], Bustamente [2526], Cuatrociénegas [136], and Zapotitlán [5038]) contain more plant species with ethnobotanical uses than regions having relatively more homogeneous vegetation such as coniferous, oak-pine forests (Michoacán, [4937]) or scrublands (Baja California, [4836]; Table 2).

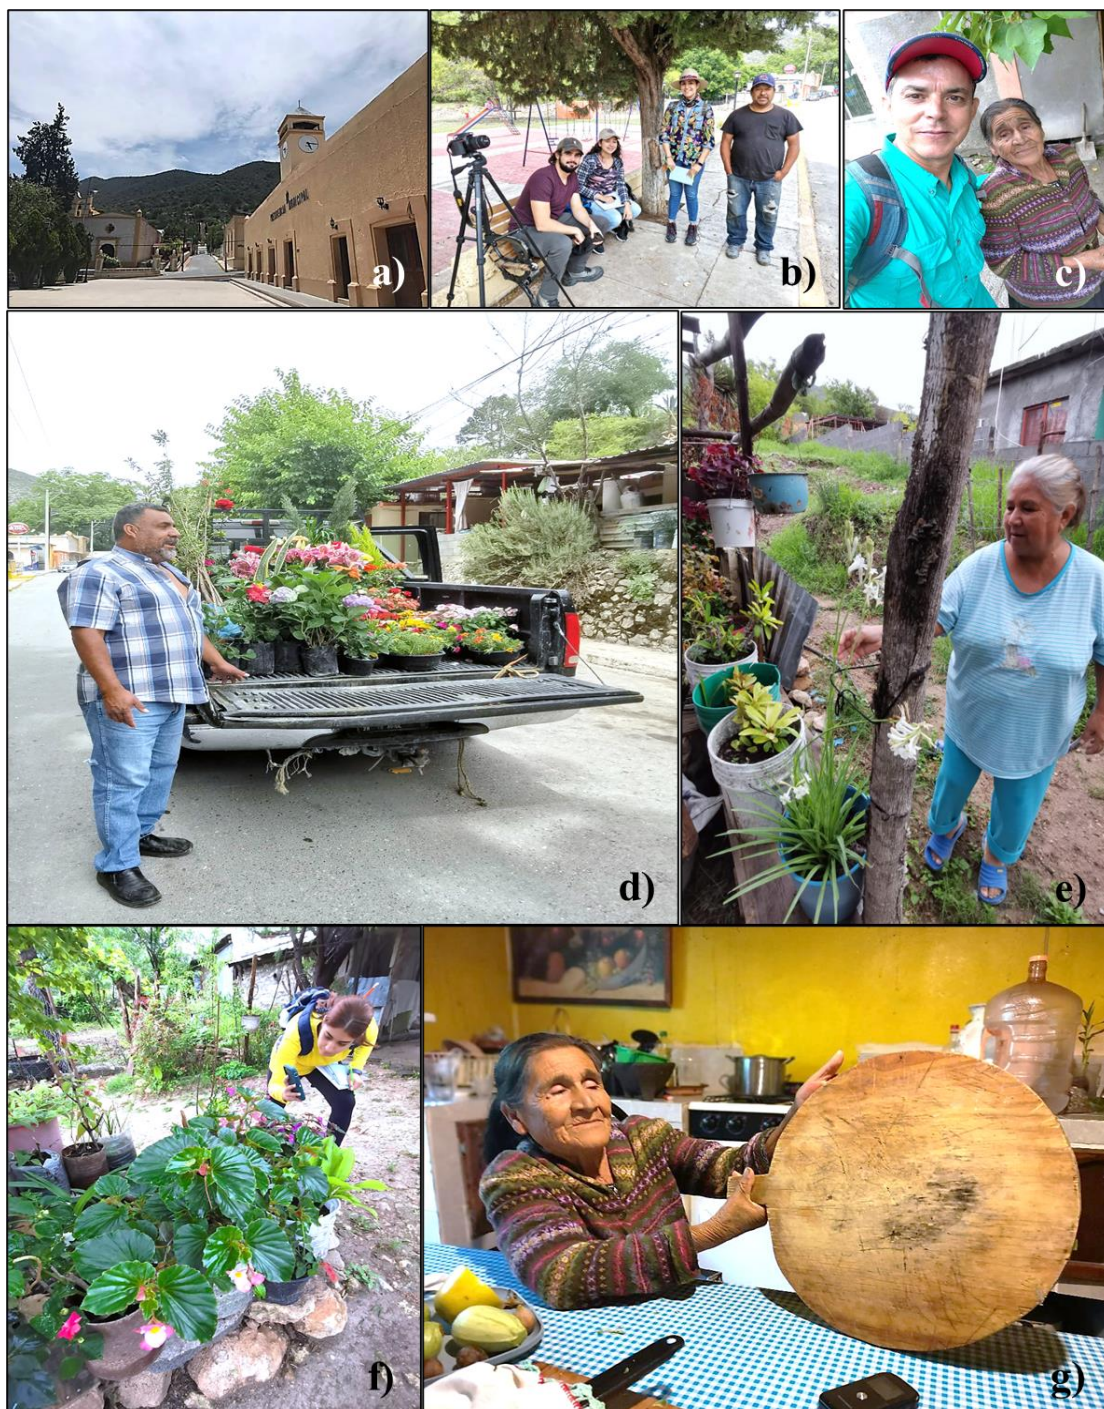

**Figure 2.** Ethnobotanical work in Iturbide, Nuevo León, Mexico. NOTE: Prior and informed consent was obtained during the application of the interviews, for the taking of photographs, as well as the authorization of informants photographed for publication [27,28,42,43], (a) Local square of the municipality of Iturbide, (b,c) Work team during the application of the interviews, (d) Sale of ornamental plants through the streets of various colonies of Iturbide, (e) Caring for ornamental plants in private gardens by local residents, (f) Taking photographs of ornamental plants for their taxonomic identification, (g) Kitchen



table ("~~tabla de pizar/chopping board~~") used as a support to cut fruits, vegetables and meats; for food preparation.

**Table 1.** Number of families, genera, and species of plants used by residents of Iturbide, Nuevo León, México, according to the interviewed. These plants were separated between eudicots, monocots, conifers and allies, and ferns and allies.

|                 | Eudicots | Monocots | Conifers and Allies | Ferns and Allies | TOTAL |
|-----------------|----------|----------|---------------------|------------------|-------|
| <b>Families</b> | 65       | 13       | 3                   | 2                | 83    |
| <b>Genera</b>   | 82       | 31       | 6                   | 2                | 121   |
| <b>Species</b>  | 204      | 34       | 10                  | 2                | 250   |

We found that the most abundant and species rich plant families in Iturbide are Asteraceae, Fabaceae, Poaceae, Euphorbiaceae, and Cactaceae (Figure 3a), the same pattern of predominant plant families in the northern, central and southern regions of Mexico [38,39,40]; as well as, in other regions of the world, where the two main reported families are, Asteraceae and Fabaceae [1,2,6,7]. Furthermore, it is common to that the local abundance of plants in a given taxon correlates with the number of ethnobotanical uses identified for that taxon; therefore, the richest families in terms of the number of species are then frequently those that are mentioned most frequently in ethnobotanical studies [41–43]. The enormous number of uses-ethnobotanical applications registered in Iturbide is evidenced by the great variety of species-taxa used for ethnobotanical purposes, especially in small and rural areas, far from large cities and where using plant species for diverse ethnobotanical uses-utilizations is a strongly rooted tradition, greatly extended in the day-to-day needs of some communities [3,7,9,13,44–46].

Of the ethnobotanical exploitations registered in Iturbide, 140 are native while 110 are exotic (Appendix A). The introduced plants represent a high value, as in other zones of the Northeast [13], but lower than in other remote regions [1,6]. Herbaceous taxa were the most abundant (120), followed by shrubs (58), trees (55), and succulents (17). The relatively cool climatic conditions allow the presence of a varied flora most of the year. The streets, parks, and sidewalks are predominantly dominated by evergreen vegetation and many herbaceous plants that flower even in the coldest months (December and January).

The most common uses of the plant species in Iturbide are ornamental, medicinal, food, forage, wood, and fuel (Figure 3b). These patterns of plant harnessing are similar to other works from the northeast region [13,24–27]. We observe that, unlike other sites in Mexico, ornamental plants are highly relevant [13], displacing the medicinal and edible categories in second and third place (Figure 3b). This new phenomenon of cultural appreciation of ornamental plants may be related to the need to mitigate solar radiation in gardens and public parks, as well as in homes [13]. While on the other hand, it is currently known that plants in desert regions of northwestern Mexico provide health benefits in the face of climatic stress, generating a feeling of euphoria and relief among the population;

an effect associated with the monsoons (torrential summer rains) and the release of terpenes from plants, these biogenic organic compounds are considered to help mitigate oxidative stress diseases, improve sleep quality, stabilize emotional hormones, improve digestion, they increase mental clarity and reduce depression and anxiety [18]. Therefore, the inclusion of ornamental species in the ethnobotanical cultural baggage of Iturbide and other regions of northeastern Mexico may have a similar effect to that reported for the northwestern part of the country, since the climatic and vegetation conditions are very similar [13,24,38,39]. In addition, species such as *Sambucus canadensis*, *Baccharis salicifolia*, *Prosopis glandulosa* and *Larrea tridentata* are shared between both regions and reported in both investigations [18].

**Table 2.** Diversity of taxa with ethnobotanical ~~applications~~ ~~uses~~ recorded in of northeastern (NE), northwestern (NW), central-west (CW) and southern (S) Mexico.

|            | Locations                                                   | Families | Genera | Taxa | EcosystemHabitats                        |
|------------|-------------------------------------------------------------|----------|--------|------|------------------------------------------|
| NE, Mexico | Iturbide, Nuevo León                                        | 83       | 121    | 250  | Oak-pine, desert scrub                   |
| NE, Mexico | Cumbres de Monterrey National Park (CMNP), Nuevo León; [26] | 69       | 170    | 240  | Oak-pine forest, and desert scrub        |
| NE, Mexico | Rayones, Nuevo León; [27]                                   | 91       | 228    | 252  | Mainly desert scrub, and oak-pine forest |
| NE, Mexico | Bustamante, Nuevo León; [25]                                | 66       | 176    | 218  | Desert scrub, oak-pine forest            |
| NE, Mexico | Cuatro Ciénegas, Coahuila; [13]                             | 57       | 132    | 158  | Desert scrub                             |
| NW, Mexico | Sierra Juarez, Baja California; [48]                        | 27       | 39     | 48   | Desert homogeneous scrubland             |
| CW, Mexico | Monarch butterfly Biophere Reserve, Michoacán; [49]         | 65       | 132    | 213  | Oak-pine, pine forest                    |
| S, Mexico  | Zapotitlán de las Salinas, Puebla; [50]                     | 79       | 219    | 298  | Different scrublands                     |

NOTE: Column two represents the sites located in the Northeast region and other regions of the country, where other ethnobotanical works have been carried out, with which we have compared our results in terms of the number of families, genera, and species identified in Iturbide.

### 3.2. ~~Ornamental~~ Ethnobotanical uses

#### 3.2.1 Ornamental

The individuals interviewed showed a greater knowledge ~~ofen~~ the ornamental ~~utilization~~ ~~use~~ of plants, recognizing 132 ~~species~~ ~~taxa~~, corresponding to 52.8% of the total, ~~with respect to~~ ~~concerning~~ the medicinal ones, with only 100 ~~species~~ (Appendix A). This phenomenon differs from the results of other ethnobotanical studies conducted in Nuevo León [26,27,34,35], and other regions of Mexico [3,8,37,39,10,48,50]. Currently, the importance of ornamental plants is documented, for example, in Cuatrociénegas, Coahuila; where they are important in gardens and public squares [136]. As in Cuatrociénegas, in

Iturbide the presence of ornamental plants is noticeable in streets and private properties. In addition, on weekends, plant vendors come to the area to sell exotic herbaceous and shrubby species, which is why the inhabitants of Iturbide use introduced ornamental species more, instead of native ones (Figure 2d-2f). This phenomenon is associated with the adaptation of the ~~species-taxa~~ to the environmental conditions of the place, as well as the care that the owners provide them. Therefore, ornamental plants play an important role ~~in for~~ the socio-cultural well-being of the inhabitants, through landscape beauty [5147]. In addition, very possibly, as in the Sonoran Desert, they provide well-being in human health, through the release of biogenic organic compounds [189].

Among the exotic species, herbaceous plants (37 ~~species~~) were the most frequent, followed by trees (22 ~~species~~) and shrubs (19 ~~species~~; Appendix A). The most abundant herbaceous species were *Hypoestes phyllostachya*, *Dianthus caryophyllus*, *Cymbopogon citratus*, *Vinca minor*, *Zantedeschia aethiopica*, *Asparagus setaceus*, *Canna indica*, *Impatiens hawkeri*, *Tulipa gesneriana*, *Pelargonium hortorum*, and *Lavandula angustifolia*. The most abundant shrubs were *Lagerstroemia indica*, *Alcea rosea*, *Cascabela thevetioides*, *Lonicera japonica*, *Euphorbia milii*, and *Hibiscus syriacus*. Among the most frequently mentioned ornamental exotic trees in Iturbide were *Schinus molle*, *Cupressus lousitanica*, *Cupressus sempervirens*, *Thuja occidentalis*, *Sapium sebiferum*, *Punica granatum*, *Ficus carica*, and *Prunus persica*. In private gardens, it is common also to see orange, lemon, barreta, peach, and apricot trees as ornamental species. These ~~species-taxa~~ are commonly found also in many other areas, ~~being characterized by its relevant ethnobotanical use in these other regions and,~~ and importantly, ~~are~~ being used in botanical gardens for ethnobotanical purposes [485252].

Among the most common herbaceous native species ~~with ornamental use appreciate~~ ~~ornamentally were are~~ *Beloperone gutatta*, *Spathiphyllum wallisii*, *Dahlia coccinea*, *Zinnia elegans*, *Commelina coelestis*, *Plumbago pulchella*, and *Nephrolepis exaltata*. The most common shrubs were *Rhus trilobata*, *Tecoma stans*, *Euphorbia pulcherrima*, *Bauhinia purpurea*, and *Parthenocissus quinquefolia*. Many of these ~~species-taxa~~ have similar ethnobotanical ~~uses~~ ~~implications~~ in other regions of Mexico or in other regions of northern Latin America ~~such as Venezuela~~ [5353,54]. The most common native trees with ornamental use in Iturbide were *Acer negundo*, *Juniperus flaccida*, *Carya illinoensis*, *Juglans major*, *Magnolia grandiflora*, *Morus celtidifolia*, *Pinus cembroides*, *Casimiroa pringlei*, *Salix nigra*, *Fraxinus americana*, and *Quercus virginiana*. ~~From Of~~ the ornamental species, 45 have other types of ~~uses~~ ~~exploitation~~ such as food, medicine, and construction material (Appendix A). Some of these species holds multiple ethnobotanical uses, such as *Matricaria recutita*, [55] and different species of *Opuntia* [56], *Quercus* [57], *Prunus* [58], *Citrus* [59], and *Capsicum* [60]. According to interviewees, ornamental herbaceous ~~species-taxa~~ are especially selected for their physiognomy. The selection of ornamental shrubs and trees is based on their general appearance, life form, maximum height and ~~other uses~~ ~~forms of exploitation~~, such as providing shade in cities, food, firewood, and ~~for~~ construction material (Appendix A). Some shrubby or ornamental tree species with succulent stems are used as living fences, notably the columnar cacti [5464].



### 3.2.2.3. Medicinal

Medicine was the second ~~most common use relevant anthropocentric category~~ in the study, with 100 species, ~~which representing the~~ 40% of the total flora found. ~~A value was raised considering that it is a mestizo region in comparison with the number of species reported for indigenous regions [1,2,7,49]. All of them are basically used. The mentioned taxa are used~~ to cure or alleviate different illnesses. At least 36 different plant families have some medicinal ~~use application~~, with Asteraceae (16 genera and 16 species), Lamiaceae (12 genera and 13 species), Euphorbiaceae (5 genera and 5 species), and Cactaceae (3 genera and 6 species), being the most represented, ~~the first families reported around the world [1,2,7]~~. These ~~medicinal families with medicinal uses~~ are recurrent in different areas of Mexico [~~9,55~~45,62]. In Iturbide, practically all parts of the plant are used for medicinal purposes (Figure 3c). Leaves from 67 different species are frequently used for medical purposes, of which 64 are native herbaceous species. Among the most common native herbaceous species mentioned by interviewees were *Equisetum laevigatum*, *Monarda citriodora*, *Chrysactinia mexicana*, *Hedeoma drummondii*, *Eryngium heterophyllum*, *Artemisa ludoviciana*, *Euphorbia dentata*, and *Tagetes lucida*. The most common exotic herbaceous species ~~with medicinal uses in local medicine~~ were *Matricaria recutita*, *Ocimum basilicum*, *Allium sativum*, *Ruta graveolens*, and *Zingiber officinale* (Appendix A).

The stems of some shrubby species are frequently used as medicine, including *Baccharis salicifolia*, *Flourensia cernua*, *Croton suaveolens*, *Jatropha dioica*, and *Leucophyllum frutescens*. A total of 20 ~~species-taxa~~ of trees (11 native, and nine exotic) ~~has-have~~ medicinal properties, with the leaves, bark and fruits being the most used components. Among the most commonly mentioned medicinal native tree species were *Carya illinoensis*, *Juglans major* and *Persea americana*, while the most mentioned exotic species were *Azadirachta indica*, *Moringa oleifera*, *Eucalyptus camaldulensis*, *Eriobotrya japonica*, *Citrus limon*, and *Citrus sinensis*. The fruits of 12 ~~species-taxa~~ (seven native and five exotic) are used to heal several ailments. The most frequently used were *Cordia boisieri*, *Crataegus mexicana*, *Ficus carica*, *Citrus* spp., and *Capsicum annuum*. It is noteworthy that although only one specie and one variety (*Capsicum annum* var. *glabriusculum*) is mentioned, there are several forms of this species with varying flavors and levels of spice (Appendix A), which interviewees identified by their common names, such as chili piquín, *Japanese chili*, serrano pepper and jalapeño pepper (Appendix A, ~~[63]~~). Some dry fruits (pecans) including *Carya illinoensis*, and the immature fruits of *Sida rhombifolia* and *Malva parviflora* are used to treat varicose veins and digestive discomfort. Species with medicinal fruits are commonly cultivated in private gardens, developing a dual role of ~~useutilization~~. Some of these are seasonal, as in the case of tejocote (*Crataegus mexicana*), nispero (*Eriobotrya japonica*) and guayaba (*Psidium guajaba*), although they can be dried or prepared as a syrup and stored for ~~a-later~~ use. ~~With the exception of Except for~~ *Eriobotrya* fruits, medicinal fruits are collected and sold in the local market. The medicinal ~~use application~~ of inflorescences is highly correlated to the use of stems and leaves, more frequently in herbaceous and aromatic species. Stems and leaves

are almost always combined and boiled [55,56], particularly those of *Gnaphalium viscosum*, *Chenopodium ambosioides*, *Grindelia inuloides*, *Tagetes lucida*, *Hedeoma drumondii*, and *Turnera diffusa* [24,64–66]. The medicinal roots used in Iturbide all come from exotic plant ~~species~~ ~~taxa~~ and are mainly used boiled or raw to alleviate digestive ailments. These include *Lepidium peruvianum*, *Raphanus sativus*, *Aloe vera*, and *Zingiber officinale*. The root of ~~one-the~~ native ~~plant-species-~~*Eryngium heterophyllum*, is used ~~for medical purposes-~~ to dissolve kidney stones and to treat hemorrhoids, diabetes, and high cholesterol [73,67]. ~~The-boiled bark-of-three-Other~~ native ~~medicinal plants species-~~ of Juglandaceae, *Juglans* (one species) and *Carya* (two species) ~~species-~~ are used as hair dye and also as antifungal and antibacterial agents. ~~such antibacterial properties are proven~~ [56,68].

Other medicinal ~~uses-treatments-~~involving the use of bracts and fruit shells, the boiled bracts of *Bougainvillea*, are frequently used to treat angina pain and cough, but they also have antibacterial and antidiabetic properties [57,69]. Lemon and orange peels, along with the leaves, are boiled and the solution is used to relieve chest pains, colds cough, ~~and~~ throat pain. ~~In Trinidad Island it is also used to eliminate kidney stones [70]. Between~~ ~~Among~~ the most common methods for the preparation of medicinal plants in Iturbide, it is highlighted boiling, grinding, creating poultice and consuming raw, ~~the same use with same results, reported for arid and semi-arid zones of Mexico~~ (Figure 3d, Appendix A, [58,59]).

The most frequent illnesses mentioned by the interviewees were digestive, respiratory, nervous, endocrine, and circulatory ailments (Table 3). This result correlates with the classification of diseases and related health problems recorded by the World Health Organization [60,74]. Digestive and respiratory ailments are mainly cured with boiled leaves in form of infusion. Almost all medicinal ~~species-taxa~~ recorded in Iturbide are prepared this way, and the majority of them are herbaceous and shrubby species belonging to the families Asteraceae (*Gnaphalium viscosum*, *Grindelia inuloides*, *Flourensia cernua*, *Matricaria recutita*, and *Tagetes lucida*), Euphorbiaceae (*Croton suaveolens*, *Euphorbia dentata*, and *Tragia ramosa*), as well as almost all genera of Lamiaceae, *Allium cepa*, *A. sativum*, *Moringa oleifera*, *Eucalyptus camaldulensis*, *Purshia plicata*, *Verbena canescens* and *Larrea tridentata*. ~~After-boiling~~ ~~On the other hand,~~ ~~the-use-of-~~raw leaves, stems, roots and fruits is the second most frequent way to alleviate symptoms. ~~Among-t~~ ~~The most commonly harvested taxa are, species-used-were-~~*Apium graveolens*, *Eryngium heterophyllum*, *Kalanchoe daigremontiana*, *Rorippa officinale*, *Lophophora williamsii*, *Opuntia ficus-indica*, *Jatropha dioica*, *Psidium guajaba*, and *Larrea tridentata*. *Apium graveolens* roots are used also against ~~the~~ toxicity of trace elements [61,78,2]. *Kalanchoe diagremonaitana* has antitumor, antihistamine and anti-inflammatory properties [73,62]. In addition to treating arthritis and muscle pain in the back and neck, *Lophophora williamsii* has compounds that produce hallucinations and cognitive impairment- [74]. In addition to hair dye and a skin antifungal agent uses, the roots of *Jatropha dioica* are reported to be massaged directly into the gums to prevent tooth loss. [75].

In many cases, medicinal plants parts are used raw and do not require preparation, those are only disinfected with chlorine and crushed or ground, then applied as poultices to heal superficial wounds. They are also chewed and consumed to control blood sugar concentration, cholesterol, and high blood pressure. Some local people mentioned that they consume garlic, onion, coriander and parsley periodically to reduce the risk of diabetes and high blood pressure. Raw stems of several Cactaceae are very commonly used to heal endocrine illnesses, digestive issues and low cholesterol; they are prepared by washing the cladodes (stems), removing the thorns, grinding the material and drinking the solution. The milled pulp (*Lophophora*) is frequently mixed with alcohol and marijuana to be used as a cataplasm to heal arthritis and muscle pain in the limbs, a very common method of healing in Mexican culture [13, 59]. A variety of plant families are prepared as poultices including almost all parts of the plant (stems, leaves, fruits, bark and inflorescences) and are used in a variety of ways: boiled, ground and raw. In Iturbide, one of the most common genera prepared in this way is *Amphipterygium*, whose bark is boiled and applied as a cataplasm to serve as an antibiotic. Its bark is used to prevent cytotoxic proliferation, as an antibacterial agent [63, 76], and to heal gastritis and stomach pains [77]. The leaves of plants in the genus *Buddleja* are used as a cataplasm to heal epidermic wounds, and these species also produce methanolic extracts from cell cultures which have photoprotective effects on the skin due to their production of secondary phenolic metabolites [64, 78]. *Opuntia* and *Cylindropuntia* stems are commonly used as forage, food and poultice in Iturbide, but also to treat diarrhea [79].

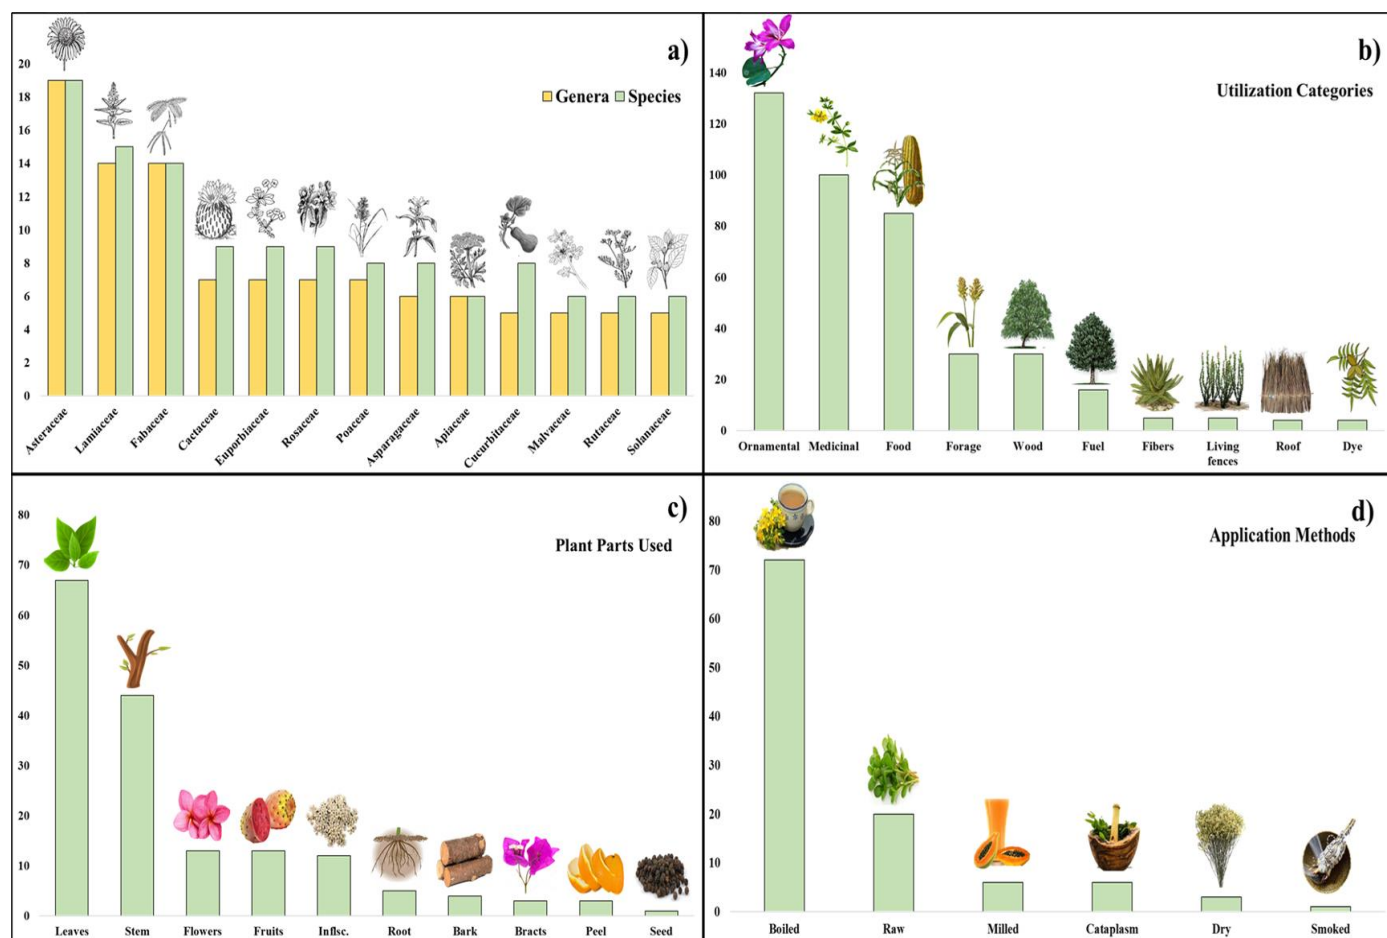

**Figure 3.** (a) Best represented families, in terms of genera (in yellow) and species (in green) of ethnobotanical importance in the study site (Iturbide, Nuevo León, Mexico), (b) Main ethnobotanical uses of plants registered in the flora, according to the interviewed, (c) Number of mentions of the plant part used to heal ills and diseases by the interviewed individuals, (d) Identified methods by the interviewed for the medicinal use of the sampled species in Iturbide, Nuevo León.

A solution of *Lophophora* stems mixed with alcohol is commonly used in rural areas to treat arthritis in northern Mexico, but is also traditionally used as a hallucinogen [83,65]. Similarly, female *Cannabis* inflorescences are mixed with alcohol and used as a poultice to relieve arthritis and muscle pains, and the dried inflorescences are also smoked for recreational purposes [13]. The former use may be closely related to the fact that the contents of flavonoids, cannabinoids, and terpenoids reportedly have anti-inflammatory, anticancer and neuroprotective properties [84,66]. Leaves from *Thymus* genus are frequently used to relieve respiratory and gastrointestinal ailments and skin infections. However, currently, derivatives from its essential oils are more widely used due to their reported antimicrobial and anticancer effects [82,67]. In Iturbide, *Melia* has properties to cure gastrointestinal symptoms, and *Melia* leaves in cold water have also been reported to

cure diarrhea in South Africa [83,68]. Similarly, raw or boiled *Lycopersicon* fruits are used as a poultice for their antibacterial, antifungal and antiviral properties derived from its peptides [84]. Parts of *Jatropha dioica* are crushed and milled, and the resulting pulp is applied directly to the head to dye the hair black, prevent hair loss, control dermic head infections and it is frequently used as a shampoo. Its antifungal properties may be due to the presence of alkali esters, acetic acid, and ferulic acid, but also to certain diterpenes such as citralitrone, jatrophatrione, jatropholone A, and jatropholone B present in stems and roots of this species [85,69].

A traditional medicinal use of *Plectranthus coleoides* is achieved from the plant's drying, milling it with glycerine, and spreading it on the chest and nostril to treat chest pain, and runny nose, and breathing problems. Other species of this genus are also have a medicinal application to treat for toothache, dermatitis, throat pain, antiseptic, vomiting, nausea, ear infections and burns [86]. Blending *Capsicum annuum* fruits in water generates a relatively spicy solution that is consumed to treat coughs and extract phlegm. Other studies have reported that it is effective as a circulatory stimulant [87], and that can be also used as an antioxidant, anti-inflammatory [88], and gastric anticancerigen [70,89]. The plant parts of some taxa are used completely dry; the most commonly used in Iturbide are *Larrea tridentata* to treat foot odor, and three species of Lamiaceae, *Monarda citriodora*, *Hedeoma drummondii*, and *Poliomintha longiflora*, whose dry leaves and branches are put under the pillow at night to reduce the effects of insomnia. *Monarda citriodora* is also used to treat wounds, fevers, skin infections and respiratory problems [90]. *Hedeoma drummondii* is used to treat infections and sore throats Appendix A, [91].

### 3.2.3.4. Food

The edible category Food was the third most common plant use-exploitation in Iturbide with 87 species (45 native and 42 exotic species; Appendix A), a considerable number with respect to other ethnobotanical works [3,6]. Most consumed plants are herbaceous (48 species), followed by trees (21 species), shrubs (14 species), and succulents (4 species). The most-used parts of the plant with the greatest use are the fruits followed by leaves, seeds, roots and flowers. The most frequently consumed fruits belong to introduced species such as *Mangifera indica*, *Ananas comosus*, *Citrullus lanatus*, *Cucumis melo*, *Cucurbita ficifolia*, *Ficus carica*, *Malus domestica*, *Prunus* spp., *Citrus* spp. The fruits of several common native species-taxa are also used, including *Celtis pallida*, *Carica papaya*, *Cucurbita moschata*, *Persea americana*, and *Physalis philadelphica*. Several of these species are widely used as food and are also traded in food markets in southern Mexico [9,10,20,92], southwest China [93], Indonesia [94], and Angola [95] as well as in many other parts of the world.

Many of the fruit trees that are commonly consumed in northeastern Mexico [6,26,35,36,10,13,25-27] are part of relatively large gardens, which also contain various applications, such as providing shade, beauty and food. This pattern is observed in Iturbide, where fruit trees such as *Punica granatum*, *Prunus persica*, *Malus domestica*, *Citrus limon*, *Ficus carica*, *Persea americana*, and *Eriobotrya japonica* are common, and. Some of these species are



common in South Africa [96] and the Pyrenees (Spain–France, [97], with similar uses, all of these species are exotic (Appendix A).

Other ~~species-taxa with an edible used-exploitation are~~ *Apium graveolens*, *Spinacea oleracea*, *Coriandrum sativum*, *Origanum mejorana*, and *Petroselinum crispum*; ~~some of these have~~ similar uses ~~have been reported~~ in Italy [7198]. The leaves of two exotic ~~species-taxa~~ are frequently used raw as ingredients in salads or are cooked with other species, *Portulaca mundula* (verdolaga) and *Portulaca oleracea*. *Portulaca mundula* is very common in Iturbide, it grows in abandoned farm fields and on sidewalks and roadsides. *Portulaca oleracea* is considered a “medicinal food”, due to its richness in omega-3 polyunsaturated fatty acids [7299] ~~and in the US it is introduced into the diet to replace the fatty acids usually ingested in fast foods [100]~~. *Rorippa officinale* (berro) grows in urban riparian systems and is consumed raw or cooked. It is suggested that its consumption can potentially reduce the probability ~~ies~~ to get cancer [10173] due to its antioxidant activity [10274].

Seeds are the third most commonly consumed plant part in Iturbide as food. The most important seed-producing species in the area are *Phaseolus vulgaris* (beans) and *Zea mays* (corn). These important food products are part of Mexican diets nation-wide, both of which have been used since pre-Hispanic times [10375]. The bean, of Mesoamerican origin [10476], is considered the most important domesticated legume in ~~the~~ America and together with *Zea* and *Cucurbita* constitutes the widespread food triad of the Mesoamerican culture [105]. ~~*Phaseolus vulgaris*~~~~*Zea mays*~~, is currently distributed throughout the globe, occupying other cultural roles, for example, in ~~the~~ Republic of Benin, it also has religious, forage, and medicinal uses, the medicinal of which ~~are-is~~ derived from the leaves, ~~roots~~ and seeds [10677], in Morocco, *Zea mays* is also commonly used a medicinal species [107,108], since this species has been popular for curing diseases of the genitourinary system [78].

The seeds of *Pinus cembroides* are commonly used as food and as an ingredient in various regional candies. Historically, the seeds of pinyon pine (piñonero) have been used by indigenous tribes of ~~the~~ southern USA and northern Mexico. They are rich in protein, low in starch and contain seven of the nine essential amino acids, they are especially rich in cystine and tryptophan [79109].

Other introduced ~~species-taxa~~ whose seeds are widely used as a complementary part of the diet belong to the Leguminosae and Poaceae families. *Lens culinaris*, *Pisum sativum*, *Cicer arietinum* ~~and~~ *Avena sativa* have been historically used as food [80110], and ~~they are~~ ~~are still widely~~ consumed around the world [81,82111]. ~~They are commonly cultivated in home gardens in the Republic of Georgia [112]. Today, *Avena sativa* is grown around the world and is a staple food in many countries [113]. These~~ Its seeds ~~function as~~ ~~nutraceuticals, e.g. *A. sativa*, which~~ contain several groups of psychoactive phytochemicals that have been shown to improve cognitive function [11483].

In addition to seeds, the roots of several ~~species-taxa~~ are used in meal preparation, especially *Solanum tuberosum* (papa), *Ipomoea batatas* (camote), *Pachyrhizus erosus* (jícama), and *Daucus carota* (zanahoria). There are several Neotropical legumes with edible roots

including *Vigna*, *Pediomelum*, *Apios* and *Pachyrhiz*us. Of these only *P. erosus*, a species native to Mexico, ~~and~~ is widely cultivated in gardens or for export. It is cultivated throughout Mesoamerica, ~~and with a strong introductioned~~ in southeast Asia [84,115]. The potato *Solanum tuberosum* is one of the most important food crops worldwide along with wheat, corn, and rice, and is cultivated in ~~more than 140 many~~ countries ~~around the world~~[116]. Two native root species are used to make alcoholic beverages: *Dasyilirion* [117] and *Agave*. In addition, the sap of *Agave americana* is widely ~~used~~ harnessed in Mexico for the extraction of “agua miel” (honey water, raw) or syrup or honey (cooked, [34,35,85]). *Dasyilirion* is ~~used~~ utilized for the manufacture of “sotol” (alcoholic beverage) and its leaves in many parts of Mexico are used for making handicrafts, in the specific case of Rarámuri women for crafting baskets [118,86].

Within the Cactaceae family, the flowers of two native species *Yucca*, *Y. treculeana* and *Y. filifera*, are collected seasonally and cooked with eggs ~~in order~~ to increase the flower’s protein content [119,87]. These are also cooked with chili, tomato and onion to prepare a classic regional dish from the Northeast of the country [25-27,34,35]. The stems of the native ~~species~~ *Echinocactus platyacanthus* (biznaga burra) are cooked with white and brown sugar to make crystallized candies, this plant also has ornamental and medicinal uses [120,88] and serves as fodder for goats [25-27,34,35]. These practices ~~they~~ are currently prohibited and regulated by Mexican legislation (NOM-059-SEMARNAT-2010). The stems of *Opuntia* are widely ~~used~~ utilized for food or forage, *Opuntia ficus-indica* being one of the most economically important species of cacti due to its long history of domestication and multiple uses [121,89]. Many other *Opuntia* species produce sweet fruits (tunas) which are sold in markets throughout Mexico and worldwide [122,90].

### 3.2.4.5. Forage

Given that cattle raising and farming are common occupations in Iturbide, ranchers cultivate or collect forage to feed domestic livestock ~~instead~~ of purchasing it. Forage almost always consists of native plants when livestock ~~are~~ is grazed in open areas, compared with a mixed diet of native and exotic species when livestock are kept within town limits.

We registered at least 30 forage ~~species-taxa~~ where the consumed material consists mainly of leaves and fruits. Several Cucurbitaceae including *Cucurbita mochata*, *C. pepo*, *C. ficifolia*, *Cirtullus lanatus*, *Cucumis melo*, and *C. anguria* are ~~used~~ utilitation for food, but also, the dry leaves and fruit peel of them are given to the cattle as fodder, same practices carried out in Yucatan, Mexico (*Cucunis anguria*, common name: meloncillo,) [123,91]. Another example is the use of two cultivated species of *Cucurbita* (*C. pepo* and *C. mochacta*), which are an important part of traditional farming polyculture systems called milpas (the milpa is a farming system made up of the so-called triad: corn, beans and squash), these species help control erosion, and maintaining moisture by limiting solar penetration through the canopy and reducing ~~the~~ growth of weeds [124]. The most common way to feed livestock,

is after harvesting the fruit, it is common to introduce directly (cows, pigs, sheep, or goats) to feed on plant debris.

Several Poaceae such as *Sorghum bicolor*, *S. halepense* and *Bouteloua curtipendula*, are among the most common forage species used to feed cattle. *Sorghum halepense* has become a pest species in both natural and agricultural areas and due to its abundance, it is often used as forage in Iturbide [125]. It is considered as the world's sixth worst weed, invading many different crops in more than 50 countries, and affecting millions of hectares [126,92]. In Iturbide, this species is not a pest since the climate is not suitable for its development. Other forage species are: *Carya illinoensis* and *Juglans major* that are collected after falling from the tree and given to cattle. On the other hand, species-taxa frequently found in abandoned farmlands and used as grazing areas are *Chenopodium ambrosioides* and *Amaranthus palmeri* (both Amaranthaceae), *Helianthus annuus* and *Taraxacum officinale* (both Asteraceae), *Turnera diffusa* (Turneraceae), *Acalypha hederacea* (Euphorbiaceae), and *Arachis hypogaea* (Fabaceae).

Other multipurpose shrubs are widely used also as forage. The leaves of *Rhus virens*, *Calliandra conferta*, *Prosopis glandulosa*, and *Vachellia farnesiana* constitute an important part of the diet of domestic cattle in the region. As well as the dry or fleshy fruits of several native shrubs and trees such as *Cordia boissieri*, *Diospyros palmeri*, *Quercus virginiana*, *Quercus canbyi*, *Quercus polymorpha*, *Prosopis glandulosa*, and *Vachellia farnesiana* (Appendix A), which are used as seasonal forage. The fruits of other species-taxa such as *Diospyros* spp. are used in similar way in Ethiopia [127,93]. The acorns from *Quercus* spp. are used as food in Slovakia [128,94] and at least seven other species of *Cordia* have edible fruits and are used-utilized in the same way in Mexico [129,95]. Two species of Cactaceae that are important in the diet of cattle are the native *Opuntia ficus-indica* and *O. lindheimeri*. Both are cut with a machete and their thorns scorched to provide easy, efficient, cheap and nutritious livestock feed. *Opuntia* spp. are extremely useful livestock forage, providing digestible energy, vitamins, and water; although they are mainly used for cattle, this species is also used as forage for pigs [130].

### 3.62.5.- Construction and fuel

Of the 30 species-usetaxa ethnobotany & harnessed for construction, 80% are trees. Also, 27 of these species are native, with the exception of *Cupressus lousitanica*, *C. sempervirens*, and *Thuja occidentalis*. Only four shrub species, *Rhus virens*, *R. trilobata*, *Agave americana*, and *A. aff. scabra* are-is used for construction. The wood of the first two species is mainly used to make tools for use in the home or for agricultural activities such as handles for brooms, machetes, rakes and hoes. The huge, dried peduncles (called quito) of *Agave* inflorescences are used as gates on rural properties, livestock guards, and clothesline supports. Since the houses and buildings in Iturbide are entirely made of concrete, and the gas is used-utilized as a heat source, wood is used mainly to build storage rooms, columns and ceilings for rest rooms, corrals and chairs. In northern Mexico, wood is stored to be used as fuel for barbecuing and to heat water for bathing. Wood from

conifers (~~i.e.~~<sup>e.g.</sup> *Pinus*, *Cupressus*, *Juniperus*, and *Thuja*), Fabaceae (*Prosopis* and *Vachellia*), and oak (*Quercus*) ~~is~~<sup>are</sup> the most frequently used as a heat source due to their hardness and durability. In Turkey, the wood of conifers and ~~ao~~<sup>o</sup>aks such as *Cupressus*, *Juniperus*, *Pinus*, and *Quercus* are used also as firewood and to make fences [96~~131~~]. The wood of *Helietta parvifolia* is very hard, durable and resistant to pests, which makes it excellent for use as fence posts that last up to 20 years [25,27~~34,35~~]. *Prosopis laevigata* and *Vachellia farnesiana* are among the 33 multipurpose species; their branches are used for fuelwood and fodder [132]. The stems of *Fouquieria splendens* are cut, allowed to dry for several weeks and used to make pens for chickens or pigs; some species of this genus also have ornamental uses because of the beauty of ~~theirs~~<sup>its</sup> flowers [133]. DNA sequencing of coprolites has shown that our prehistoric ancestors also consumed *Fouquieria* plants [134~~97~~]. The wood of *Carya* is used to make chairs, tables, and benches. Its wood is excellent for use in tool handles because of its strength and shock resistance. This species is considered the most important nut tree native ~~to in~~ North America. Its nuts are also a high-quality food source due to their high protein and fat contents [135].

### 3.7.2.6. Fibers

The ~~use-exploitation~~ of natural fibers has decreased dramatically in northeastern Mexico. Interviewees in Iturbide noted that it is not economically lucrative to sell goods made from natural fibers. Very few people work with plant fibers as a permanent job, but those who do use *Agave lechuguilla*, *A. americana*, *Yucca carnerosana*, and less commonly, *Hechtia podantha*. The fiber collection and handling process remains the same as it was 50 years ago: (1) travel to locate and collect the plant, (2) bundle it, (3) use a mule or donkey to transport it, (4) extract the fiber with relatively artisanal instruments, and (5) dry it ~~in~~ ~~order~~ to sell the fiber.

### 3.8.2.7. Live fences

The construction of living fences in rural areas of northern [25,27~~34,35~~] and southern [136~~98~~] ~~of~~ Mexico is common and has several objectives. Live fences serve as a barrier to natural elements and prevent entry to private property. The ~~use-utilization~~ of live fences is less expensive than the construction of block and cement fences, and it contributes to ~~the~~ beautification of the property. Due to their large size, uniform structure and durable leaves and thorns, the succulent species of the Asparagaceae, Cactaceae and Fouquieriaceae families are the most frequently used as live fences. The most used ~~species-taxa~~ in Iturbide are *Myrtillocactus geometrizans*, *Agave americana*, *Yucca filifera*, *Y. treculeana* and *Fouquieria splendens*. The rich diversity of columnar cacti used as living fences is manifested in the south-central region of southern Mexico, where at least 14 ~~species-taxa~~ of cacti are ~~used~~ ~~exploited~~ as components of living fences: *Escontria chiotilla*, *Myrtillocactus geometrizans*, *M. schenkii*, *Pachycereus hollianus*, *Polaskia chende*, *P. chichiipe*, *Stenocereus griseus*, *S. stellatus*, *S. treleasei*, *S. fricii*, *S. queretaroensis*, *S. quevedonis*, *S. beneckeian*, and *S. satnaileyii* [136~~99~~]. The

light green and yellow-bordered leaves of *A. americana* var. *americana* can reach up to 2.5 m in length and their scape (peduncle) can measure up to 4.5 m in height with extremely showy inflorescences in yellow panicles that attract multiple pollinators. *Agave americana* is also cultivated in Ecuador as a live fence to delimit land for grazing and farming [~~137~~97]. The flowers of this and other species of *Agave* are eaten cooked, including *A. salmiana* and *A. mapisaga* (called “gualumbos”), both species are two of the most commercialized flowers and with the largest number of ways of cooking in popular cuisine of origin Otomí, in the Center of Mexico (Pachuca, Hidalgo; [10038]).

When live fences are constructed by planting *Yucca* plants directly adjacent to one another, they form a practically insurmountable barrier. Their resistant stems and thorny, leathery leaves cannot be easily broken by domestic cattle, and they reach up to 4 m in height. In addition, their flowers are edible and provide ~~a~~ delicious seasonal food; which ~~are~~is also consumed in the Center of the country in the State of Hidalgo [~~138~~100]. In drier areas of Iturbide, dried stems from *Fouquieria splendens* are widely used as barriers~~[139]~~, ~~as~~ for instance, to fence goats and chickens.

### 3.9.2.8. Dye

Natural dyes obtained from plants have been widely used in Mexican ~~from~~since the pre-hispanic era [~~140~~]. Indigenous cultures in the western United States have used various plant species ~~as~~ dyes [98], several of which are also found in Iturbide, including *Arundo donax*, *Cucumis melo*, *Gutierrezia sarothrae*, *Juglans major*, *Junieprus deppeana*, *Larrea tridentata*, *Opuntia engelmannii*, *Phaselus vulgaris*, *Prunus persica*, *Taraxacum officinale*, and *Zea mays*. In Iturbide, we have registered the use of five species with dying properties (Appendix A). The leaves, branches and fruits of species of Juglandaceae (*Carya* and *Juglans*) are boiled in water to create black or dark brown dye used to color hair. In eastern North America, *Juglans cinerea* is used as a dye, but also in construction as veneer, wood carvings, furniture and cabinetry [10142]. The ripe and raw fruits of *Hylocereus undatus* (Cactaceae) and *Morus celtidifolia* (Moraceae) provide intense bright red and dark purple colors of great beauty which are used directly or boiled in water to create dye for clothes, tablecloths and fibers. Currently, in Iturbide, the use of these techniques is sporadic and practiced by very few people, especially older adults from neighboring towns who continue practicing artisan staining methods. The betacyanins extracted from the fruit of *Hylocereus polyrhizus* are used as a natural colorant for ice cream; their application causes total color changes, similar to the commercial colorant (E-162), having greater acceptability than the artificial colorant [~~143~~102].

### 3.10.2.9. Roof

Dry leaves of Arecaceae species such as *Washingtonia* and *Brahea* and stems of Poaceae such as *Bambusa* and *Arundo* are excellent elements for making roofs. The leaves are intertwined or spliced one on top of the other and tied, the large interwoven surface that the leaves provide creates an effective barrier against sun, wind and rain. The stems of the



grasses *Bambusa* and *Arundo* are cut to a homogeneous size and tied with twine to create roof panels, although these are more fragile and less resistant to inclement weather. In northeastern Mexico (Sonora), the most widely used part is the leaves that are employed in weaving, thatching, and broom-making. Their trunks are also used for construction, and the fruit and sometimes the palm heart for food [144,103].

### 3.4.3. Quantitative ethnobotanical indices (IFC, UVI, FL)

Nowadays, ~~continued the harnessed botanical taxa plant use for ethnobotanical purposes~~ and the importance that people give to the medicinal properties ~~of certain species~~ are relevant factors ~~for to~~ determining the ethnobotanical value of the regional flora [1,4,5,6,13,20,24,55] of Iturbide. According to the number of uses recorded for the different ailments, the highest IFC values were obtained for the respiratory (0.92), genitourinary (0.91), ophthalmic (0.90), digestive (0.89), and nervous (0.88) systems (Table 3). These systems represent the main health problems recognized by the World Health Organization (WHO, [60]), as well as in research on the documentation of traditional medicine [1,2,7]. Among the ~~species taxa~~ that had the most mentions to heal respiratory illnesses were those from the families Lamiaceae, (*Ocimum basilicum*, *Mentha piperita*, *Monarda citriodora*), Asteraceae (*Tagetes lucida*), Liliaceae (*Allium sativa*) and Rutaceae (*Citrus limon*). Many of these families are reported to be different traditional peoples in different parts of the world, e.g. in the Himalayas, Amazon, and Australia. This is because plant families share common biochemistry (chemosystematics), which helps us understand traditional ethnobotanical knowledge around the world [104].

Few species were cited for the treatment of genitourinary and circulatory diseases, but those seemed to be particularly effective, especially *Turnera difussa*, *Eryngium heterophyllum*, and *Equisetum laevigatum*. The most commonly mentioned species included *Eryngium heterophyllum*, which has proven to be an excellent remedy for high cholesterol levels [145,105], and the multipurpose medicinal species *Petroselinum crispum*, which is used as a diuretic, a carminative, a gastro~~nomic~~<sup>tonic</sup> agent, an anti-inflammatory, these properties of the plant have been corroborated in formal studies [106]. Moreover, this species is used to treat amenorrhea, cardiac disease, gastrointestinal disorder, hypertension, urinary disease, otitis, nasal congestion, diabetes and several dermal diseases [146]. It is worth noting that, although there are only three species used for the cure of ophthalmic ailments, *Matricaria recutita*, *Echeveria simulans*, and *Sedum palmeri*, they are invariably used for that particular purpose. Although the IFC value for the gastrointestinal system ranked fourth, it is almost quantitatively equal to the respiratory, genito urinary, and o~~ap~~htalmic systems.

**Table 3.** Category of use, number of species mentioned (nt), number of uses recorded (nur), and Informant Consensus Factor (IFC) of medicinal plants used in Iturbide, Nuevo León, Mexico. The roman numerals correspond to the WHO International Statistical Classification of Diseases and Related Health Problems (2006, [74,60]).

| Category of use (system)    | Number of species mentioned (nt) | nur | FIC  |
|-----------------------------|----------------------------------|-----|------|
| Digestive (XI)              | 29                               | 259 | 0.89 |
| Respiratory (X)             | 20                               | 249 | 0.92 |
| Skin and subcutaneous (XII) | 17                               | 38  | 0.57 |
| Endocrin (IV)               | 16                               | 74  | 0.79 |
| Circulatory (IX)            | 13                               | 73  | 0.83 |
| Nervous (VI)                | 13                               | 99  | 0.88 |
| Musculoskeletal (XIII)      | 11                               | 38  | 0.73 |
| Infectious (I)              | 8                                | 61  | 0.88 |
| Genitourinary (XIV)         | 6                                | 57  | 0.91 |
| Ophthalmic (VIII)           | 3                                | 22  | 0.90 |

**Table 4.** Plant species with medicinal uses that obtained the highest UVI values in Iturbide, Nuevo León, Mexico. The letter ‘E’ and ‘N’ refer to the Exotic and Native origin of each species, respectively.

| Scientific name                                      | UVI  | Origin |
|------------------------------------------------------|------|--------|
| <i>Lepidium peruvianum</i> G.Chacón                  | 3    | E      |
| <i>Ocimum basilicum</i> L.                           | 2.4  | E      |
| <i>Rosmarinus officinalis</i> L.                     | 2.29 | E      |
| <i>Mentha piperita</i> L.                            | 2.25 | E      |
| <i>Cinnamomum verum</i> J.Presl.                     | 2.06 | E      |
| <i>Plectranthus coleoides</i> Benth.                 | 2    | E      |
| <i>Thymus vulgaris</i> L.                            | 2    | E      |
| <i>Citrus sinensis</i> (L.) Osbeck                   | 2    | E      |
| <i>Amphipterygium adstringens</i> (Schltdl.) Standl. | 2    | N      |
| <i>Conyza filaginoides</i> (DC.) Hieron              | 2    | N      |
| <i>Taraxacum officinale</i> (L.) Weber ex F. H.Wigg. | 1.86 | E      |
| <i>Psidium guajava</i> L.                            | 1.86 | N      |
| <i>Syzygium aromaticum</i> (L.) Merr. & L. M. Perry  | 1.75 | E      |
| <i>Eucalyptus camaldulensis</i> Dehnh.               | 1.73 | E      |
| <i>Zea mays</i> L.                                   | 1.72 | N      |

The Use Value Index (UVI) is considered a reflection of the potential use of a particular species to treat ailments. Higher UVI values indicate a more frequent use of the given species to alleviate a particular ailment [13]. It is interesting to note that the highest UVI values were obtained for exotic species, ten of which have UVI values greater than 2. The species in order of increasing importance are *Lepidium peruvianum* (3), *Ocimum basilicum* (2.4), *Rosmarinus officinale* (2.29), *Mentha piperita* (2.25), *Cinnamomum verum* (2.06), and *Plectranthus coleoides* (2, Table 4). The native species with the greatest UVI values were *Conyza filaginoides* (2), *Psidium guajava* (1.86), and *Zea mays* (1.72). All interviewees

mentioned that *Lepidium peruvianum* relieves gastrointestinal, endocrine (prostate), and urinary (kidney) ailments.

The other mentioned species, especially those belonging to the Lamiaceae family, are frequently cited in the literature as having medicinal properties, especially to treat ailments of the respiratory system [107]. A total of 17 medicinal taxa obtained 100% of Fidelity Level. These plants were the most commonly mentioned to heal a specific type of disease. A total of 13 medicinal taxa with the highest Fidelity Level are native and four are exotic, with the families Asteraceae [108] and Lamiaceae [107] being the most well-represented (Table 5). Moreover, at least 11 families are used for medicinal purposes (Appendix A), and the fact that almost all species used have a fidelity level of 100% indicates that these species are quite well known for their healing properties. The taxa with the highest number of mentions were *Equisetum laevigatum*, *Turnera diffusa*, *Artemisia ludoviciana*, *Flourensia cernua*, *Ficus carica*, and *Verbena canescens*.

**Table 5.** Fidelity label (FL) values were obtained for the main medicinal plant species mentioned by interviewers in Iturbide, Nuevo León, México. Ip= number of informants who indicated the use of a plant for the same particular illness; Iu= number of informants who mentioned the species for any illness within a category of use.

| Plant species                                                           | Ailment                  | Ip | Iu | FL(%) |
|-------------------------------------------------------------------------|--------------------------|----|----|-------|
| <i>Chenopodium ambrosioides</i> L.                                      | Gastro-intestinal system | 16 | 16 | 100   |
| <i>Eryngium heterophyllum</i> Hemsl. & Rose                             | Circulatory system       | 15 | 16 | 94    |
| <i>Artemisia ludoviciana</i> Nutt.                                      | Gastro-intestinal system | 17 | 17 | 100   |
| <i>Calea oliveri</i> B.L.Rob. & Greenm.                                 | Gastro-intestinal system | 14 | 14 | 100   |
| <i>Chrysactinia mexicana</i> A. Gray                                    | Gastro-intestinal system | 18 | 18 | 100   |
| <i>Flourensia cernua</i> DC.                                            | Gastro-intestinal system | 17 | 17 | 100   |
| <i>Gnaphalium viscosum</i> Kunth                                        | Respiratory system       | 14 | 14 | 100   |
| <i>Equisetum laevigatum</i> A. Braun                                    | Genito-urinary system    | 28 | 28 | 100   |
| <i>Hedeoma drummondii</i> Benth.                                        | Nervous system           | 16 | 16 | 100   |
| <i>Monarda citriodora</i> var. <i>austromontana</i> (Epling) B.L.Turner | Respiratory system       | 24 | 26 | 92    |
| <i>Punica granatum</i> L.                                               | Gastro-intestinal system | 14 | 14 | 100   |
| <i>Ficus carica</i> L.                                                  | Endocrin system          | 17 | 17 | 100   |
| <i>Moringa oleifera</i> Lam.                                            | Endocrin system          | 9  | 9  | 100   |
| <i>Purshia plicata</i> (D.Don) Henr.                                    | Gastro-intestinal system | 10 | 10 | 100   |
| <i>Citrus x limon</i> (L.) Osbeck                                       | Respiratory system       | 16 | 16 | 100   |
| <i>Turnera diffusa</i> Willd. ex Schult.                                | Genito-urinary system    | 19 | 19 | 100   |
| <i>Verbena canescens</i> Kunth                                          | Nervous system           | 17 | 17 | 100   |

## 5. Conclusions

Iturbide presents a high biocultural diversity of ethnobotanical species taxa, this diversity is made up of native and exotic species, in general, it is very similar to that of other nearby areas with similar climate, relief and vegetation in the state of Nuevo León [13,24,27,48–23], and in for the Northeast Mexico zone [59], the Northern macroregion [48,86], and

general for arid and semi-arid zones in Mexico [50]. In addition, this diversity at the local level has a relationship with the variation of altitude within Iturbide, being possible to find several types of vegetation, including scrub vegetation at lower altitudes, and coniferous forests at higher altitudes, forming an ecotone between these vegetations. This heterogeneity means that there are no differences in its diversity, even concerning pine-oak forest sites [49].

Comparing the level of knowledge and use of ethnobotany in Iturbide, and the significance with respect to other sites shown in the investigation, with We can conclude that there is other areas of the Northeast and the rest of the country, this is significant [6,34,35]. What translates as a strong cultural roots attachment to native and exotic flora; and it is complete with a multifunctional roll. Based on the significance, we can conclude that the traditional ethnobotanical knowledge of the local inhabitants of the Iturbide mestizo region is highly important. Therefore, Our results contribute to the raise the level of ethnobotanical biocultural diversity in Northeast Mexico, and in general the North of the country. We maintain support that the knowledge and use practices of plants use of plants in rural mestizo regions, in arid and semi-arid zones, as well as and in transition zones [3,36], are as relevant as those rooted to in localities of indigenous tradition and high biological diversity [37,38].

In the study site, the inclusion of exotic species with respect concerning to the native ones is important, this has also been reported in other localities of the region [136]. This pattern demonstrates the learning capacity of local communities in the face of the entry of new plant species, creating new knowledge and taking advantage of them, and even promoting a phenomenon of co-evolution.

Both native and exotic plants play a multifunctional role, taking advantage of various anthropocentric categories, and highlighting the ornamental use. Regarding the ornamental flora, it shows the abundance of species for this purpose, which are cultivated in public parks and private gardens. This phenomenon has been documented in other localities [136], and its relevance is associated with the population's interest in mitigating solar radiation, enhancing the landscape beauty of arid and semi-arid areas; contributing significantly to the reduction of stress caused by climate change, improving physical and emotional human health and well-being [918].

Despite showing cultural changes, where medicinal and food plants go into the background, after being more relevant for their role in primary human functions, they continue to be important and are used to cure a series of diseases. Interestingly, species with higher use value (UVI) are introduced, further promoting these cultural changes and meeting new health needs of local residents. However, the level of fidelity (FL) maintains certain native species to address problems with the digestive and respiratory systems. Regarding edible plants, these are seasonal and continue to be included in the local gastronomy. All this shows that traditional knowledge, despite undergoing adaptations, continues to prevail and is transmitted from generation to generation. However, they are at risk from the increasing loss of the younger population.

**Author Contributions:** Research design and approach: EEC, TVGS, JAVQ, LGCR. Ethnographic methodological design: MMS, JAED, WH, MMSR. Biological methodological design: MMSR, JG, MCC, LMSM, RJE, PGZ. Interview Application: All authors participated in the application of the interviews. Databases: HGE, MGG, PGZ, IRAS. Analysis of data: EEC, IRAS, WH. Design of figures and tables: JG, MCC, LMSM, RJE, PGZ. Manuscript writing: EEC, TVGS, JAVQ, LGCR, JAED, MMS. Document revision: All authors reviewed the manuscript. Edition: EEC, TVGS, IRAS.

All authors contributed significantly to this manuscript. All authors have read and agreed to the published version of the manuscript.

**Funding:** This research received no external funding.

**Institutional Review Board Statement:** Not applicable.

**Informed Consent Statement:** Not applicable.

**Data Availability Statement:** Not applicable.

**Acknowledgments:** To the local inhabitants for their support in the development of the interviews and the collection of the botanical specimens

**Conflicts of Interest:** The authors declare no conflict of interest.

## References

1. Singh B, Singh B, Kishor A, Singh S, Bhat MN, Surmal O, Musarella CM. Exploring plant-based ethnomedicine and quantitative ethnopharmacology: medicinal plants utilized by the population of Jasrota Hill in western Himalaya. *Sustainability* 2020, 12, 7526; <http://doi.org/10.3390/su12187526>.
2. Bhat MN, Singh B, Surmal O, Singh B, Shivgotra V, Musarella CM. Ethnobotany of the Himalayas: safeguarding medicinal practices and traditional uses of Kashmir Regions. *Biology* 2021, 10, 851, <http://doi.org/10.3390/biology10090851>.
3. Khanum H, Ishtiaq M, Bhatti KH, Hussain I, Azeem M, Mehwish M, Hussain T, Mushtaq W, Thind S, Bashir R, Muzamil M, Abdel-Hafez SH, Sayed S. Ethnobotanical and conservation studies of tree flora of Shiwalik mountainous range of Distric Bhimber Azad and Kashmir, Pakistan. *Plos One* <http://doi.org/10.1371/journal.pone.0262338>.
4. Iernigan KA, Belichenko OS, Kolosova VB, Orr DJ. Naukan ethnobotany in post-Soviet times: lost edibles and new medicinals. *J. ethnobiol. ethnomed.* 2017, 13:61, <http://doi.org/10.1186/s13002-017-0188-1>.
5. Packer J, Turpin G, Ens E, Venkataya B, Community Mbabaram, Rangers Y, Hunter J. 2019. Bulding partnerships for linking biomedical science with traditional knowledge of customary medicines: a case study with two Australian indigenous communities. *J. ethnobiol. ethnomed.* 2019, 15:69, <http://doi.org/10.1186/s13002-019-0348-6>.
6. Molares S, Ladio A. Ethnobotanical reviwie of the Mapuche medicinal flora: use patterns on a regional scale. *J. Ethnopharmacol.* 2009, 122:2, 251-260, <http://doi.org/10.1016/j.jep.2009.01.003>.
7. Silva AL, Tamashiro J, Begossi A. Ethnobotany of riverine populations from the Rio Negro, Amazonia (Brazil). *J. Ethnobiol.* 2007, 27(1):46-72.
8. De-Ávila, A. La diversidad lingüística y el conocimiento etnobiológico. In *Capital natural de México, conocimiento actual de la biodiversidad*, 1st ed.; CONABIO, Eds.; CONABIO: CDMX, México, 2008, pp. 497-556.
9. Lira, R.; Casas, A.; Blancas, J. *Ethnobotany of Mexico, interactions of people and plants in Mesoamerica*. 1st ed.; Springer: New York, USA, 2016; <http://doi.org/10.1007/978-1-4614-6669-7>.



103. Narváez-Elizondo, R.E.; González-Elizondo, M.; Castro-Castro, A.; González-Elizondo, M.S.; Tena-Flores, J.A.; Chairez-Hernández, I. Comparison of traditional knowledge about edible plants among young Southern Tepehuans of Durango, Mexico. *Bot. Sci.* 2021, 99, 834–849; <http://doi.org/10.17129/botsci.2792>.
114. Bonta, M.; Pulido-Silva, M.T.; Diego-Vargas, T.; Vite-Reyes, A.; Vovides, A.P.; Cibirián-Jaramillo, A. Ethnobotany of Mexican and northern Central American cycads (Zamiaceae). *J. ethnobiol. ethnomed.* 2019, 15; <http://doi.org/10.1186/s13002-018-0282-z>.
125. Madamombe-Manduna, I.; Vibrans, H.; Vázquez-García, V. Género y conocimientos etnobotánicos en México y Zimbabwe, un estudio comparativo. *Sociedades rurales. Producción y medio ambiente* 2009, 9, 21–48.
136. Estrada-Castillón, E.; Villarreal-Quintanilla, J.A.; Encina-Domínguez, J.A.; Jurado-Ybarra, E.; Cuéllar-Rodríguez, L.G.; Garza-Zambrano, P.; Arévalo-Sierra, J.R.; Cantú-Ayala, C.M.; Himmelsbach, W.; Salinas-Rodríguez, M.M.; Gutiérrez-Santillán, T.V. Ethnobotanical biocultural diversity by rural communities in the Cuatrociénegas Valley, Coahuila; Mexico. *J. ethnobiol ethnomed.* 2021, 17; <http://doi.org/10.1186/s13002-021-00445-0>.
147. Salick, J.; Zhendong, F.; Byg, A. Eastern Himalayan alpine plant ecology, Tibetan ethnobotany, and climate change. *Glob Environ Change* 2009, 19, 147–155; <http://doi.org/10.1016/j.gloenvcha.2009.01.008>.
158. Abid, F.; Afza, R.; Mustafa, G. Ethnobotany and sustainable utilization of plants in the Potohar Plateau, Pakistan. In *Biodiversity, Conservation and Sustainability in Asia Prospects and challenges in South and Middle Asia*. 1st ed.; Öztürk, M., Mulk-Khan, S., Altay, V., Efe, R., Egamberdieva, D., Khassanov, F.O., Eds.; Springer: Switzerland, 2022; pp. 911–29.
16. Berkes, F. *Traditional ecological knowledge in perspective*. In *Traditional ecological knowledge: concepts and cases*, 2nd ed.; International Program on Traditional Ecological Knowledge/International Development Research Centre/Canadian Museum of Nature: Ontario, Canada, 1993; pp. 1–10.
17. Pierotti, R.; Wildcat, D. Traditional ecological knowledge: the third alternative (commentary). *Ecol Appl* 2000, 10, 5, 1333–1340.
18. Pauli, N.; Abbott, L.K.; Negrete-Yankelevich, S.; Andrés, P. Farmers' knowledge and use of soil fauna in agriculture: a worldwide review. *Ecol. Soc.* 201, 3, 19.
19. Hunn, E. The utilitarian factor in folk biological classification. *Am. Anthropol.* 1982. <http://doi.org/10.1525/aa.1982.84.4.02a00070.2>.
20. Hunn, E. *A Zapotec natural history. Tree, herbs and flowers, birds, beasts, and bungs in the life of San Juan Gbëë*. 1st ed. Tucson: The University of Arizona Press; 2008.
219. Nabhan, G.P.; Daugherty, E.; Hartung, T. Health benefits of the diverse volatile oils in native plants of ancient ironwood-giant cactus forests of the Sonoran Desert: an adaptation to climate change?. *Int. J. Environ. Res. Public Health* 2022, 19, 3250; <http://doi.org/10.3390/ijerph19063250>.
2210. Instituto Nacional de Lenguas Indígenas (INALI). Catálogo de las lenguas indígenas nacionales: variantes lingüísticas de México con sus autodenominaciones y referencias geoestadísticas. Primera Sección. Diario Oficial de la Federación México: CDMX, México, 2009.
13. —Ludwinsky, R.H.; Hanazaki, N. Ethnobotany in a coastal environmental protected area: shifts in plant use in two communities in southern Brazil. *J. ethnobiol. ethnomed.* 2018, 14; <http://doi.org/10.1186/s13002-018-0265-0>.
23. Rzedowski, J. *Vegetación de México*, 1st ed.; Editorial Limusa: CDMX, Mexico, 1978.
2417. Estrada, E.; Soto, B.; Garza, M.; Villarreal, J.A.; Jiménez, J.; Pando, M.; Sánchez-Salas, J.; Scott-Morales, L.; Cotera-Correa, L. Medicinal plants in the southern region of the state of Nuevo León, Mexico. *J ethnobiol ethnomed.* 2012, 8, <http://doi.org/10.1186/1746-4269-8-45>.

25. Estrada-Castillón, E.; Villarreal-Quintanilla, J.A.; Rodríguez-Salinas, M.M.; Encinas-Domínguez, A.; González-Rodríguez, H.; Romero-Figueroa, G.; Arévalo, J.R. Ethnobotanical survey of useful species in Bustamante, Nuevo León, Mexico. *Hum. Ecol.* 2018, 46, 117-132; <http://doi.org/10.1007/s10745-017-9962-x>.
26. Estrada, E.; Villarreal, J.A.; Cantú, C.; Cabral, I.; Scott, L.; Yen, C. Ethnobotany in the Cumbres de Monterrey National Park, Nuevo León, Mexico. *J. ethnobiol ethnomed.* 2007, 3; <http://doi.org/10.1186/1746-4269-3-8>.
27. Estrada-Castillón, E.; Garza-López, M.; Villarreal-Quintanilla, J.A.; Salinas-Rodríguez, M.M.; Soto-Mata, B.E.; González-Rodríguez, H.; González-Urbe, D.U.; Cantú-Silva, I.; Carrillo-Parra, A.; Cantú-Ayala, C. Ethnobotany in Rayones, Nuevo León, Mexico. *J. ethnobiol ethnomed.* 2014, 10; <http://doi.org/10.1186/1746-4269-10-62>.
28. Ceuterick, M.; Vandebroek, I.; Torry, B.; Pieroni A. Cross-cultural adaptation in urban ethnobotany: The Colombian folk pharmacopoeia in London. *J. Ethnopharmacol.* 2008, 120, 342-359; <http://doi.org/10.1016/j.jep.2008.09.004>.
2912. Vandebroek, I.; Balick, M.J. Globalization and loss of plant knowledge: Challenging the paradigm. *Plos One* 2012, 7, e37643; <http://doi.org/10.1371/journal.pone.0037643>.
30. Aziz MA, Ullah Z, Pieroni A. Wild food plants gathering among Kalasha, Yidgha, Nuristani and Khowar speakers in Chitral, NW Pakistan. *Sustainability* 2020, 12, 9176, <http://goi.org/10.3390/su12219176>.
31. Perrino EV, Wagensommer RP. Crop wild relatives (CWRs) threatened and endemic to Italy: urgent actions for protection and use. *Biology* 2022, 11, 193, <http://doi.org/10.3390/biology11020193>
3214. Ramirez, C.R. Ethnobotany and the loss of traditional knowledge in the 21st Century. *Ethnobot. Res. Appl.* 2007, 5, 245-247.
3315. Torres-Avilez, W.; Muniz-de-Medeiros, P.; Albuquerque, U.P. Effect of gender on the knowledge of medicinal plants: Systematic review and meta-analysis. *Evid.-Based Complement. Altern. Med.* 2016, 6592363; <http://doi.org/10.1155/2016/6592363>.
16. —Rzedowski, J. *Vegetación de México*, 1st ed.; Editorial Limusa: CDMX, Mexico, 1978.
34. Morrone, J.J. Hacia una síntesis biogeográfica de México. *Rev. Mex. Biodiv.* 2005, 76, 2.
35. Morrone, J.J. Mexican biogeographic provinces: Map and shapefiles. *Zootaxa.* 2017, 4277, 2, 277-279.
36. Instituto Nacional de Estadística y Geografía (INEGI). *Síntesis geográfica de Nuevo León; Secretaría de Programación y Presupuesto: Nuevo León, México, 2020.*
37. ~~González-Medrano, F. Las comunidades vegetales de México. 2nd ed.; Secretaría del Medio Ambiente y Recursos Naturales/Instituto Nacional de Ecología: México, 2004.~~
38. 18. —Estrada, E.; Arévalo, J.R.; Villarreal, J.A, Salinas-Rodríguez, M.M.; Encina-Domínguez, J.A.; González-Rodríguez, H.; Cantú-Ayala, C.M. Classification and ordination of main plant communities along an altitudinal gradient in the arid and temperate climates of northeastern Mexico. *Sci. Nat.* 2015,102; <http://doi.org/10.1007/s00114-015-1306-3>.
19. —Instituto Nacional de Estadística y Geografía (INEGI). *Anuario estadístico y geográfico de Coahuila de Zaragoza, 1st ed.; Instituto Nacional de Estadística y Geografía: Coahuila, México, 2017.*
20. —Instituto Nacional de Estadística y Geografía (INEGI). *Censo de población y vivienda, principales resultados por localidad; Instituto Nacional de Estadística y Geografía: CDMX, México, 2010.*
21. —Instituto Nacional de Estadística y Geografía (INEGI). *Síntesis geográfica de Nuevo León; Secretaría de Programación y Presupuesto: Nuevo León, México, 1986.*
22. —~~González-Medrano, F. Las comunidades vegetales de México. 2nd ed.; Secretaría del Medio Ambiente y Recursos Naturales/Instituto Nacional de Ecología: México, 2004.~~

- ~~3923.~~ Villarreal-Quintanilla, J.A.; Estrada-Castillón, E. Flora de Nuevo León. Listados Florísticos de México XXIV, 1st ed.; Universidad Nacional Autónoma de México: CDMX, México, 2008.
- ~~4024.~~ Thiers, B. Index herbariorum: a global directory of public herbaria and associated staff. New York Botanical Garden's Virtual Herbarium. 2022. Accessed Jun 2021. <http://sweetgum.nybg.org/science/ih>
- ~~4125.~~ Martin, G.J. Ethnobotany. 1st ed.; Chapman & Hall: London, 1995.
- ~~26.~~ Estrada-Castillón, E.; Villarreal-Quintanilla, J.A.; Rodríguez-Salinas, M.M.; Encinas-Domínguez, A.; González-Rodríguez, H.; Romero-Figueroa, C.; Arévalo, J.R. Ethnobotanical survey of useful species in Bustamante, Nuevo León, Mexico. Hum. Ecol. 2018, 46, 117–132; <http://doi.org/10.1007/s10745-017-9962-x>.
- ~~4227.~~ International Society of Ethnobiology (ISE). ISE Code of Ethics. 2006. Accessed 15 Oct 2021; <http://ethnobiology.net/code-of-ethics/>.
- ~~4328.~~ Albuquerque, U.P.; Cunha, L.; Lucena, R.; Alves, R.R.N. Methods and techniques in ethnobiology and ethnoecology. 1st ed.; Springer: New York, USA, 2014; <http://doi.org/10.1007/978-1-4614-8636-7>.
- ~~4429.~~ Zar, J.H. Biostatistical Analysis. 1st ed.; Prentice Hall: New York, USA, 1999.
- ~~4530.~~ Hammer, Ø.; Harper, D.A.T. Paleontological data analysis. 1st ed.; Blackwell: USA, 2006.
- ~~4631.~~ Silva, V.A.; Albuquerque, U.P. Técnicas para análise de dados etnobotânicos. In Métodos e técnicas na pesquisa etnobotânica, 1st ed.; Albuquerque, P., Paiva de Lucena, R.F., Cunha, L.V., Eds.; NUPEEA: Pernambuco, Brazil, 2004. pp. 63–88.
- ~~4732.~~ Friedman, J.; Zohara, Y.; Amotz, D.; Palewitch, D. A preliminary classification of the healing potential of medicinal plants, based on a rational analysis of an a rational analysis of an ethnopharmacological field survey among Bedouins in the Negev Desert, Israel. J Ethnopharmacol. 1986, 16, 275–287; [http://doi.org/10.1016/0378-8741\(86\)90094-2](http://doi.org/10.1016/0378-8741(86)90094-2).
- ~~33.~~ Heinrich, M.; Ankli, A.; Fre, B.; Weimann, C.; Sticher, O. Medicinal plants in Mexico: Healer's consensus and cultural importance. Soc Sci Med. 1998, 47, 1859–1871; [http://doi.org/10.1016/s0277-9536\(98\)00181-6](http://doi.org/10.1016/s0277-9536(98)00181-6).
- ~~34.~~ Estrada, E.; Villarreal, J.A.; Cantú, C.; Cabral, I.; Scott, L.; Yen, C. Ethnobotany in the Cumbres de Monterrey National Park, Nuevo León, Mexico. J. ethnobiol ethnomed. 2007, 3; <http://doi.org/10.1186/1746-4269-3-8>.
- ~~35.~~ Estrada-Castillón, E.; Garza-López, M.; Villarreal-Quintanilla, J.A.; Salinas-Rodríguez, M.M.; Soto-Mata, B.E.; González-Rodríguez, H.; González-Uribe, D.U.; Cantú-Silva, I.; Carrillo-Parra, A.; Cantú-Ayala, C. Ethnobotany in Rayones, Nuevo León, Mexico. J. ethnobiol ethnomed. 2014, 10; <http://doi.org/10.1186/1746-4269-10-62>.
- ~~4836.~~ Wilken MA: An ethnobotany of Baja California's Kumeyaay Indians. 2012. Accessed 25 Oct 2021. <https://digitallibrary.sdsu.edu/islandora/object/sdsu%3A3815>.
- ~~4937.~~ Farfán, B.; Casas, A.; Ibarra-Manríquez, G.; Pérez-Negrón, E. Mazahua ethnobotany and subsistence in the Monarch Butterfly Biosphere Reserve, Mexico. Econ. Bot. 2007, 61, 173–191; <http://jstor.org/stable/4257197>.
- ~~5038.~~ Paredes-Flores, M.; Lira, R.; Dávila, P. Estudio etnobotánico de Zapotitlán Salinas, Puebla. Acta Bot. Mex. 2007, 79, 13–61.
- ~~39.~~ Villaseñor, J.L. Checklist of the native vascular plants of Mexico. Rev. Mex. Biodiv. 2016, 87, 559–902.
- ~~40.~~ Villarreal-Quintanilla, J.A. Listados florísticos de México: XXIII. Flora de Coahuila. 1st ed.; Universidad Nacional Autónoma de México: CDMX, Mexico, 2001.
- ~~41.~~ Martínez Pérez, A.; López, A.; Gil-Muñoz, A.; Cuevas-Sánchez, J.A. Plantas silvestres útiles y prioritarias identificadas en la Mixteca Poblana, México. Act. Bot. Mex. 2015, 98; <http://doi.org/10.21829/abm98.2012.1141>.
- ~~42.~~ Ávila-Uribe, M.M.; García-Zárate, S.N.; Sepúlveda-Barrera, A.S.; Godínez-Rodríguez, M.A. Plantas medicinales en dos poblados del municipio de San Martín de las Pirámides, Estado de México. Polibotánica 2016, 42; <http://doi/10.18387/polibotanica.42.11>.

43. Heinrich, M.; Ankli, A.; Fre, B.; Weimann, C.; Sticher, O. Medicinal plants in Mexico: Healer's consensus and cultural importance. *Soc Sci Med.* 1998, 47, 1859–1871; [http://doi.org/10.1016/s0277-9536\(98\)00181-6](http://doi.org/10.1016/s0277-9536(98)00181-6). 1178 1179
44. Beltrán Rodríguez, L.; Ortiz Sánchez, A.; Mariano, N.A.; Maldonado Almanza, B.; Reyes García, V. Factors affecting ethnobotanical knowledge in a mestizo community of the Sierra de Huautla Biosphere Reserve, Mexico. *J. ethnobiol. ethnomed.* 2014, 10, <http://doi.org/10.1186/1746-4269-10-14>. 1180 1181 1182
45. Andrade-Cetto, A. Ethnobotanical study of the medicinal plants from Tlanchinol, Hidalgo, México. *J. Ethnopharmacol.* 2009, 122, 163–171; <http://doi.org/10.1016/j.jep.2008.12.008>. 1183 1184
46. Esquivel García, R.; Pérez-Calix, E.; Ochoa Zarzosa, A.; García Pérez, M.E. Ethnomedicinal plants used for the treatment of dermatological affections on the Purépecha Plateau, Michoacán, Mexico. *Act. Bot. Mex.* 2018, 125, 95–132; <http://doi.org/10.21829/abm125.2018.1339>. 1185 1186 1187
5147. Zhang, N.; Zheng, X.; Wang, X. Assessment of aesthetic quality of urban landscapes by integrating objective and subjective factors: a case study for riparian landscapes. *Front. Ecol. Evol.* 2022; <http://doi.org/10.3389/fevo.2021.735905>. 1188 1189
5248. Lazos-Chavero, E.; Álvarez-Buylla, M.A. Ethnobotany in a tropical-humid region: The home gardens of Balzapaote, Veracruz, Mexico. *Jour. Ethnobot.* 1988, 8, 45–79. 1190 1191
53. Rendón-Correa, A.; Fernández-Nava, R. Plantas con potencial uso ornamental del estado de Morelos, México. *Polibotánica*, 2007, 23, 121–165. 1192 1193
54. Varela Romero, C.; Vizcarrondo, G.; Martínez, M. Plantas ornamentales tóxicas en Venezuela. *Bonplandia* 2017, 26, 15–34. 1194 1195
55. McKay, D.L.; Blumberg, J.B. A review of the bioactivity and potential health benefits of chamomile tea (*Matricaria recutita* L.). *Phytother. Res.* 2006, 20, 519–530; <http://doi.org/10.1002/ptr.1936>. 1196 1197
56. Bouhrim, M.; Boutahiri, S.; Kharchoufa, L.; Mechchate, H.; Al Kamaly, O.M.; Berraaouan, A.; Acute and subacute toxicity and cytotoxicity of *Opuntia dillenii* (Ker Gawl) Haw. seed oil and its impact on the isolated rat diaphragm glucose absorption. *Molecules* 2021, 26, <http://doi.org/10.3390/molecules26082172>. 1198 1199 1200
57. Taib, M.; Rezzak, Y.; Bouyazza, L.; Lyoussi, B. Medicinal uses, phytochemistry, and pharmacological activities of *Quercus* species. *Evid. Based Complement. Altern. Medicine.* 2020, 1920683; <http://doi.org/10.1155/2020/1920683>. 1201 1202
58. Koros, H.; Malombe, I.; Mwendwa, K.; Jeruto, P.; Humphrey, A.; Konje, M. Indigenous knowledge, uses and conservation of *Prunus africana* (Hook. F.) Kalkman in Nandi Forests. *Jour. Nat. Sci. Res.* 2016, 6, 56–62. 1203 1204
59. Dosoky, N.S.; Setzer, W.N. Biological activities and safety of *Citrus* spp. essential oils. *Int. Jour. Molec. Sci.* 2018, 19, 1966; <http://doi.org/10.3390/ijms19071966>. 1205 1206
60. Cichewicza, R.H.; Thorpe, P.A. The antimicrobial properties of chile peppers (*Capsicum* species) and their uses in Mayan medicine. *J. Ethnopharmacol.* 1996, 52, 61–70; [http://doi.org/10.1016/0378-8741\(96\)01384-0](http://doi.org/10.1016/0378-8741(96)01384-0). 1207 1208
6154. Pérez-Negrón, E.; Dávila, P.; Casas, A. 2014. Use of columnar cacti in the Tehuacán Valley, Mexico: perspectives for sustainable management of non-timber forest products. *J. ethnobiol. ethnomed.* 2014, <http://doi.org/10.1186/1746-4269-10-79>. 1209 1210 1211
55. Heinrich, M.; Ankli, A.; Fre, B.; Weimann, C.; Sticher, O. Medicinal plants in Mexico: Healer's consensus and cultural importance. *Soc Sci Med.* 1998, 47, 1859–1871; [http://doi.org/10.1016/s0277-9536\(98\)00181-6](http://doi.org/10.1016/s0277-9536(98)00181-6). 1212 1213
62. Lira, R.; Casas, A.; Rosas López, R.; Paredes Flores, M.; Pérez Negrón, E.; Rangel Landa, S.; Solís, L.; Torres, I.; Dávila, P. Traditional knowledge and useful plant richness in the Tehuacán-Cuicatlan Valley, México. *Econ Bot.* 2009, 63, 271–287; <http://doi.org/10.1007/s12231-009-9075-6>. 1214 1215 1216
63. Hernández Verdugo, S.; Dávila, P.; Oyama, K. Synthesis of taxonomic knowledge, origin and domestication of genus *Capsicum*. *Bot. Sci.* 1999, 64, 65–84; <http://doi.org/10.17129/botsci.1583>. 1217 1218

64. Pío León, J.F.; Nieto Caribay, A.; León de la Luz, J.L.; Delgado Vargas, F.D.; Vega Aviña, R.; Ortega Rubio, A. Plantas silvestres consumidas como tés recreativos por grupos de rancheros en Baja California Sur, México. *Act. Bot. Mex.* 2018, 123, 7–19; <http://doi.org/10.21829/abm123.2018.1275>.
65. García Sánchez, F.; López Villafranco, M.E.; Aguilar Rodríguez, S.; Aguilar Contreras, A. Ethnobotany and comparative morpho-anatomy of three species of *Tagetes* used in Nicolas Romero, State of Mexico. *Bot Sci.* 2012, 90, 221–232; <http://doi.org/10.17129/botsoci.388>.
66. Contreras Angulo, L.A.; Vega Gaxiola, D.; Emus Medina, A.; Heredia, J.B. Pharmacognostic study of leaves of *Hedeoma patens*. *Pharmacogn J.* 2018, 10, 921–924; <http://doi.org/10.5530/pj.2018.5.155>.
67. Lara Reimers, E.A.; Fernández Cusimamani, E.; Lara Rodríguez, E.A.; Zepeda-del Valle, J.M.; Polesny, Z.; Pawera, L. An ethnobotanical study of medicinal plants used in Zacatecas state, Mexico. *Act Societ Botan Polon.* 2018, 87, 247–253; <http://doi.org/10.5586/asbp.3581>.
68. Cruz-Vega, D.E.; Verde-Star, M.J.; Salinas-González, N.; Rosales-Hernández, B.; Estrada-García, I.; Mendez-Aragón, P.; Carranza-Rosales, P.; González-Garza, M.T.; Castro-Garza, J. Antimycobacterial activity of *Juglans regia*, *Juglans mollis*, *Carya illinoensis* and *Bocconia frutescens*. *Phytoter Res.* 2008, 22, 557–559; <http://doi.org/10.1002/ptr.2343>.
69. Ghogar, A.; Jiraungkoorskul, K.; Jiraungkoorskul, W. Paper flower, *Bougainvillea spectabilis*: Update properties of traditional medicinal plant. 2016, 16, 82–87; <http://doi.org/10.18311/jnr/2016/5703>.
70. Pío-León, J.F.; Nieto-Garibay, A.; León-de-la Luz, J.L.; Delgado-Vargas, F.D.; Vega-Aviña, R.; Ortega-Rubio, A. Plantas silvestres consumidas como tés recreativos por grupos de rancheros en Baja California Sur, México. *Act. Bot. Mex.* 2018, 123, 7–19; <http://doi.org/10.21829/abm123.2018.1275>.
71. Lara-Reimers, E.A.; Fernández-Cusimamani, E.; Lara-Rodríguez, E.A.; Zepeda-del-Valle, J.M.; Polesny, Z.; Pawera, L. An ethnobotanical study of medicinal plants used in Zacatecas state, Mexico. *Act Societ Botan Polon.* 2018, 87, 247–253; <http://doi.org/10.5586/asbp.3581>.
72. Clement, Y.N.; Baksh Comeau, Y.S.; Seaforth, C.E. An ethnobotanical survey of medicinal plants in Trinidad. *J. ethnobiol ethnomed.* 2015, 11; <http://doi.org/10.1186/s13002-015-0052-0>.
73. WHO World Health Organization “ICD-10 Version:2010” International Statistical Classification of Diseases and Related Health Problems 2012. Accessed 14 Mar 2022. <https://www.who.int/en>.
74. Arsenov, D; Župunski, M.; Pajević, S.; Nemeš, I.; Simin, N.; Alnuqaydan, A.M.; Watson, M.; Aloliqi, A.; Mimica-Dukić, N. Roots of *Apium graveolens* and *Petroselinum crispum* insight into phenolic status against toxicity level of trace elements. *Plants.* 2021, 10, 1785; <http://doi.org/10.3390/plants10091785>.
75. Supratman, U.; Fujita, T.; Akiyama, K.; Hayashi, H.; Murakami, A.; Sakai, H.; Koshimizu, K.; Ohigashi, H. Anti-tumor promoting activity of Bufadienolides from *Kalanchoe pinnata* and *K. daigremontiana* x *tubiflora*. *Biosc Biotechn Biochem.* 2001, 65, <http://doi.org/10.1271/bbb.65.947>.
76. Alrashedy, N.A.; Molina, J. The ethnobotany of psychoactive plant use: a phylogenetic perspective. *Peer J.* 2016, 4, e2546; <http://doi.org/10.7717/peerj.2546>.
77. Nicholson, M.S.; Arzeni, C.B. The market medicinal plants of Monterrey, Nuevo León, Mexico. *Econ. Bot.* 1993, 47, 184–192; <http://doi.org/10.1007/bf02862021>.
78. Oviedo-Chavez, T.; Ramírez-Apan, M.; Soto-Hernandez, M.; Martínez-Vazquez, M. Principles of the bark of *Amphipterygium adstringens* (Julianaceae) with anti-inflammatory activity. *Phytomedicine* 2004, 11, 436–445; <http://doi.org/10.1016/j.phymed.2003.05.003>.



77. —Alonso-Castro, A.J.; Domínguez, F.; Maldonado-Miranda, J.J.; Castillo-Pérez, L.J.; Carranza-Álvarez, C.; Solano, E.; Isiordia-Espinosa, M.A.; Juárez-Vázquez, M.C.; Zapata-Morales, J.R.; Argueta-Fuentes, M.A.; Ruiz-Padilla, A.J.; Solorio-Alvarado, C.R.; Rangel-Velázquez, J.E.; Ortiz-Andrade, R.; González-Sánchez, I.; Cruz-Juménez, G.; Orozco-Castellanos, L.M. Use of medicinal plants by health professionals in Mexico. *J Ethnopharmacol.* 2016, 198, 81–86; <http://doi.org/10.1016/j.jep.2016.12.038>
6478. Gómez-Hernández, M.A.; Flores-Merino, M.V.; Sánchez-Flores, J.E.; Burrola-Aguilar, C.; Zepeda-Gómez, C.; Nieto-Trujillo, A.; Estrada-Zúñiga, M.E. Photoprotective activity of *Buddleja cordata* cell culture methanolic extract on UVB-irradiated 3T3-Swiss albino fibroblasts. *Plants* 2021, 10, 266; <http://doi.org/10.3390/plants10020266>.
79. —Tantengco, O.A.; Condes, M.L.; Estadilla, H.H.; Ragragio, E. Ethnobotanical survey of medicinal plants used by Ayta communities in Dinalupihan, Bataan, Philippines. *Pharmacogn J.* 2018, 10, 859–870; <http://doi.org/10.5530/pj.2018.5.145>.
6580. Neal, J.M.; Sato, P.T.; Howald, W.N.; McLaughlin, J.L. Peyote alkaloids: identification in the Mexican cactus *Pelecypora aselliformis* ehrenberg. *Science*. 1972, 176, 1131–1133; <http://doi.org/10.1126/science.176.4039.1131>.
66. Lowe, H.; Steele, B.; Bryant, J.; Toyang, N.; Ngwa, W. Non-cannabinoid metabolites of *Cannabis sativa* L. with therapeutic potential. *Plants*. 2021. 10, 400; <http://doi.org/10.3390/plants10020400>.
81. —Martin-Andre, C.; Landorelle, Y. Dietary antioxidants and oxidative stress from a human and plant perspective: A Review. *Curr. Res. Nutr. Food Sci.* 2010, 6, 2–12; <http://doi.org/10.2174/157340110790909563>.
6782. Jarić, S.; Mitrović, M.; Pavlović, P. Review of ethnobotanical, phytochemical, and pharmacological study of *Thymus serpyllum* L. *Evid-Based Complement. Alter. Med.* 2015, 101978; <http://doi.org/10.1155/2015/101978>.
6883. de-Wet, H.; Nkwanyana, M.N.; van-Vuuren, S.F. Medicinal plants used for the treatment of diarrhoea in northern Maputaland, KwaZulu-Natal Province, South Africa. *J Ethnopharmacol.* 2010, 130, 284–289; <http://doi.org/10.1016/j.jep.2010.05.004>.
84. —Afroz, M.; Akter, S.; Ahmed, A.; Rouf, R.; Shilpi, J.A.; Tiralongo, E. Ethnobotany and antimicrobial peptides from plants of the Solanaceae Family: An update and future prospects. *Front. Pharmacol.* 2020; <https://doi.org/10.3389/fphar.2020.00565>.
6985. Gutiérrez-Tlahque, J.; Aguirre-Mancilla, C.L.; López-Palestina, C.; Sánchez-Fernández, R.E.; Hernández-Fuentes, A.D.; Torres-Valencia, J.M. Constituents, antioxidant and antifungal properties of *Jatropha dioica* var. *dioica*. *Nat Prod Commun.* 2019; <http://doi.org/10.1177/1934578X19852433>.
86. —Ascensão, L.; Figueiredo, A.C.; Barroso, J.G.; Pedro, L.G.; Schripsema, J.; Deans, S.G. *Plectranthus madagascariensis*: Morphology of the glandular trichomes, essential oil composition, and its biological activity. *Int J Plant Sci.* 1998, 159, 31–38; <http://doi.org/10.1086/297518>.
8770. Khan, F.A.; Mahmood, T.; Alia, M.; Saeed, A.; Maalik, A. Pharmacological importance of an ethnobotanical plant: *Capsicum annuum* L. *Nat Prod Res.* 2014, 28, 1267–1274; <http://doi.org/10.1080/14786419.2014.895723>.
88. —Luo, X.J.; Peng, J.; Li, Y.J. Recent advances in the study on capsaicinoids and capsinoids. *Eur J Pharmacol.* 2011, 650, 1–7; <http://doi.org/10.1016/j.ejphar.2010.09.074>.
89. —Alonso-Castro, A.J.; Villarreal, M.L.; Salazar-Olivo, L.A.; Gómez-Sánchez, M.; Domínguez, F.; García-Carranza, A. Mexican medicinal plants used for cancer treatment: pharmacological, phytochemical and ethnobotanical studies. *J Ethnopharmacol.* 2011, 133, 945–972; <http://doi.org/10.1016/j.jep.2010.11.055>.
90. —Lawson, S.K.; Satyal, P.; Setzer, W.N. The volatile phytochemistry of *Monarda* species growing in south Alabama. *Plants*. 2021, 10, <http://doi.org/10.3390/plants10030482>.

91. O'Meara, S.; Hopkins, M.P.; Spears, M.C.; Ferguson, T.J. Ute ethnographic and ethnobotanical research in the Bonita Peak Mining District. 1st ed.; Southern Ute Indian Tribe: Arizona, País, 2021. 1299
92. Manzanero Medina, G.I.; Vasquez Dávila, M.A.; Lustre Sánchez, H.; Pérez Herrera, A. Ethnobotany of food plants (quelites) sold in two traditional markets of Oaxaca, Mexico. S. Afr. J. Bot. 2020, 130, 215–223; <http://doi.org/10.1016/j.sajb.2020.01.002>. 1300
93. Cao, Y.; Zhou, S.; Song, L.; Quan, R.; Hu, H. Ethnobotanical study on wild edible plants used by three trans-boundary ethnic groups in Jiangecheng County, Pu'er, Southwest China. J. ethnobiol. ethnomed. 2020, 16, <http://doi.org/10.1186/s13002-020-00420-1>. 1301
94. Susandarini, R.; Khasanah, U.; Rosalia, N. Ethnobotanical study of plants used as food and for maternal health care by the Malays communities in Kampar Kiri Hulu, Riau, Indonesia. Biod J Biol Diver. 2021, 22, <http://doi.org/10.13057/biodiv/d220613>. 1302
95. Urso, V.; Signorini, M.A.; Tonini, M.; Bruschi, P. Wild medicinal and food plants used by communities living in Mopane woodlands of southern Angola: Results of an ethnobotanical field investigation. J Ethnopharmacol. 2016, 177, 126–139; <http://doi.org/10.1016/j.jep.2015.11.041>. 1303
96. Mosina, C.K.E.; Maroyi, A. Edible plants of urban domestic gardens in the Capricorn District, Limpopo Province, South Africa. Trop Ecol. 2016, 57, 181–91. 1304
97. Rigat, M.; Bonet M.A.; García S.; Carnatje, T.; Vallès, J. Ethnobotany of food plants in the High River Ter Valley (Pyrenees, Catalonia, Iberian Peninsula): Non-crop food vascular plants and crop food plants with medicinal properties. Ecol Food Nutr. 2009, 48, 303–326; <http://doi.org/10.1080/03670240903022320>. 1305
7198. Lentini, F.; Venza, F. Wild food plants of popular use in Sicily. J. ethnobiol. ethnomed. 2007, 15, <http://doi.org/10.1186/1746-4269-3-15>. 1306
7299. Ezekwe, M.O.; Omara-Alwala, T.R.; Membrahtu, T. Nutritive characterization of purslane accessions as influenced by planting date. Plant Foods Hum Nutr. 1999, 54, 183–191; <http://doi.org/10.1023/a:1008101620382>. 1307
100. Picchi, G.; Pieroni, A. Atlante dei prodotti tipici: le erbe. 1st ed.; Agra/RAI Eri: Italy, Roma, 2005. 1308
40473. Hecht, S.S.; Chung, F.L.; Richie, J.P.; Akerkar, S.A.; Borukhova, A.; Skowronski, L.; Carmella, S.G. Effects of watercress consumption on metabolism of a tobacco-specific lung carcinogen in smokers. Cancer Epidemiol. Biomark. Prev. 1995, 4, 877–884. 1309
40274. Gill, C.I.R.; Haldar, S.; Boyd, L.A.; Bennett, R.; Whiteford, J.; Butler, M.; Pearson J.R.; Bradbury, I.; Rowland. Watercress supplementation in diet reduces lymphocyte DNA damage and alters blood antioxidant status in healthy adults. Am J Clin Nutr 2007, 85, 504–510; <http://doi.org/10.1093/ajcn/85.2.504>. 1310
40375. Vázquez-Alonso M.T.; Bye, R.; López-Mata, L.; Pulido-Salas, M.A.P.; Mcclung-de-Tapia, E.; Koch, S.D. Etnobotánica de la cultura Teotihuacana. Bot Sci. 2014, 92, 563–574. 1311
76404. Gentry, H.S. Origin of the common bean, *Phaseolus vulgaris*. Econ Bot. 1969, 23, 55–69; <http://doi.org/10.1007/bf02862972>. 1312
105. Brown, C.H.; Clement, C.R.; Epps, P.; Luedeling, E.; Wichmann, S. The paleobiolinguistics of the common bean (*Phaseolus vulgaris* L.). Ethnobiol. Lett. 2014, 23, 55–69; <http://doi.org/10.14237/ebi.5.2014.203>. 1313
77406. Yêyinou-Loko, L.E.; Toffa, J.; Adjatin, A.; Akpo, A.K.; Orobiyi, A.; Dansi, A. Folk taxonomy and traditional uses of common bean (*Phaseolus vulgaris* L.) landraces by the sociolinguistic groups in the central region of the Republic of Benin. J. ethnobiol. ethnomed. 2018, 14; <http://doi.org/10.1186/s13002-018-0251-6>. 1314

- ~~78107.~~ Jouad, H.; Haloui, M.; Rhiauani, H.; Hilaly, J.El.; Eddouks, M. Ethnobotanical survey of medicinal plants used for the treatment of diabetes, cardiac and renal diseases in the North centre region of Morocco (Fez-Boulemane). *J. ethnobiol ethnomed.* 2001, 77, 2-3, [http://doi.org/10.1016/s0378-8741\(01\)00289-6](http://doi.org/10.1016/s0378-8741(01)00289-6).
- ~~79.~~ Valero-Galván, J.; Reyna-González, M.; Chico-Romero, P.A.; Martínez-Ruiz, N.R.; Núñez-Gastélum, I.A.; Monroy-Sosa, A.; Ruiz-May, E.; González-Fernández, R. Seed characteristics and nutritional composition of pine nut from five propulations of *P. cembroides* from the states of Hidalgo and Chihuahua, Mexico. *Molecules.* 2019, 24, 2057; <http://doi.org/10.3390/molecules24112057>.
- ~~108.~~ Martínez Moreno, D.; Alvarado Flores, R.; Mendoza Cruz, M.; Basurto Peña, F. Plantas medicinales de cuatro mercados del estado de Puebla, México. *Bol Soc Bot Méx.* 2006, <http://doi.org/10.17129/botsci.1735>.
- ~~109.~~ Bye, R.A. Botanical perspectives of ethnobotany of the Greater Southwest. *Econ Bot.* 1985, 39, 375–386.
- ~~110.~~ Schmidt, B.M.; Cheng, D.M. *Ethnobotany: A phytochemical perspective.* Wiley Blackwell; 2017.
- ~~80111.~~ Hurrell, J.A.; Ulibarri, E.A.; Puentes, J.P.; Costantino, F.B.; Arenas, P.M.; Pochettino, M.L. Leguminosas medicinales y alimenticias utilizadas en la conurbación Buenos Aires-La Plata, Argentina. *Bol Lat Car Pl Med Arom.* 2011, 10, 443–455.
- ~~81112.~~ Bussmann, R.W.; Paniagua-Zambrana, N.Y.; Sikharulidze, S.; Kikvidze, Z.; Kikodze, D.; Tchelidze, D.; Khutsishvili, M.; Batsatsashvili, K.; Hart, R.E. A comparative ethnobotany of Khevsureti, Samtskhe-Javakheti, Tusheti, Svaneti, and Racha-Lechkhumi, Republic of Georgia (Sakartvelo), Caucasus. *J. ethnobiol ethnomed.* 2016, 43, <http://doi.org/10.1186/s13002-016-0110-2>.
- ~~82113.~~ Singh, R.; Subrata, D.; Belkheir, A. *Avena sativa* (oat), a potential nutraceutical and therapeutic agent: an overview. *Crit Rev Food Sci Nutr.* 2013, 53; <http://doi.org/10.1080/10408398.2010.526725>.
- ~~83114.~~ Kennedy, D.O.; Bonnländer, B.; Lang, S.C.; Pischel, I.; Forster, J.; Khan, J.; Jackson, P.A.; Wighman, E.L. Acute and chronic effects of green oat (*Avena sativa*) extract on cognitive function and mood during a laboratory stressor in healthy adults: a randomised, double-blind, placebo-controlled study in healthy humans. *Nutrients.* 2020, 12, 1598; <http://doi.org/10.3390/nu12061598>.
- ~~84115.~~ Sørensen, M. Promoting the conservation and use of underutilized and neglected crops. Yam bean *Pachyrhizus* DC. 1st ed.; International Plant Genetic Resources Institute: Rome, 1996.
- ~~116.~~ Prance, G.; Nesbitt, M. *The cultural history of plants.* Routledge, 2005. p. 61–76.
- ~~85.~~ Saraiva, A.; Carrascosa, C.; Ramos, F.; Raheem, D.; Raposo, A. Agave syrup: chemical analysis and nutritional profile, applications in the food industry and health impacts. *Int. J. Environ. Res. Public Health.* 2022, 19, 7022; <http://doi.org/10.3390/ijerph19127022>.
- ~~117.~~ Bogler, D.J. Systematics of *Dasyllirion*: Taxonomy and molecular phylogeny. *Bol. Soc. Bot. Mex.* 1995, 56, <http://doi.org/10.17129/botsci.1465>.
- ~~1186.~~ Camou-Guerrero, A.; Reyes-García, V.; Martínez-Ramos, M.; Casas, A. Knowledge and use value of plant species in a Rarámuri community: A gender perspective for conservation. *Hum Ecol.* 2008, 36, 259–272; <http://doi.org/10.1007/s10745-007-9152-3>.
- ~~11987.~~ Sotelo, A.; López-García, S.; Basurto-Peña, F. Content of nutrient and antinutrient in edible flowers of wild plants in Mexico. *Plant Foods Hum Nutr.* 2007, 62, 133–138; <http://doi.org/10.1007/s11130-007-0053-9>.
- ~~88120.~~ del-Castillo, R.F.; Trujillo, S. Ethnobotany of *Ferocactus histrix* and *Echinocactus platyacanthus* (Cactaceae) in the semiarid Central Mexico: past, present and future. *Econ Bot.* 1991, 45, 495–502; <http://doi.org/10.1007/BF02930713>.
- ~~89121.~~ Griffith, M.P. The origins of an important cactus crop, *Opuntia ficus-indica* (cactaceae): new molecular evidence. *Amer J Bot.* 2004, 91, 1915–1921; <http://doi.org/10.3732/ajb.91.11.1915>.

- ~~90122.~~ Inglese, P.; Basile, F.; Schirra, M. Cactus pear fruit production. In: Cacti: biology and uses, 1st ed.; Nobel, P., Ed.; University of California/Berkeley: California, USA, 2002; <http://doi.org/10.1525/california/9780520231573.003.0010>. 1379
- ~~91423.~~ Lira, R.; Caballero, J. Ethnobotany of the wild mexican Cucurbitaceae. Econ Bot. 2002, 56, 380-398; [http://doi.org/10.1663/0013-0001\(2002\)056\[0380:EOTWMC\]2.0.CO;2](http://doi.org/10.1663/0013-0001(2002)056[0380:EOTWMC]2.0.CO;2). 1380
- ~~124.~~ Barrera-Redondo, J.; Hernández-Rosales, H.S.; Cañedo-Torres, V.; Aréstegui-Alegria, K.; Torres-Guevara, J.; Parra, F.; Torres-García, I.; Casas, A. Variedades locales y criterios de selección de especies domesticadas del género *Cucurbita* (Cucurbitaceae) en los Andes Centrales del Perú: Tomayquichua, Huánuco. Bot Sci. 2020, 98, 101-116; <http://doi.org/10.17129/botsci.2239>. 1381
- ~~125.~~ Peerzada, A.M.; Ali, H.H.; Hanif, Z.; Bajwa, A.A.; Kebaso, L.; Frimpong D.; Iqbal, N.; Namubiru, H.; Hashim, S.; Rasool, G.; Manalil, S.; van der Meulen, A.; Chauhan, B.S. Eco-biology, impact, and management of *Sorghum halepense* (L.) Pers. Biol Invasions. 2017; <http://doi.org/10.1007/s10530-017-1410-8>. 1382
- ~~92126.~~ Valverde, B.E.; Gressel, J. Dealing with the evolution and spread of *Sorghum halepense* glyphosate resistance in Argentina. 1st ed.; Consultancy Report to SENASA: Buenos Aires, Argentina, 2006. 1383
- ~~93427.~~ Dejene, T.; Agamy, M.S.; Agúndez, D.; Martin-Pinto, P. Ethnobotanical survey of wild edible fruit tree species in lowland areas of Ethiopia. Forests 2020, 11, 177; <http://doi.org/10.3390/f11020177>. 1384
- ~~94428.~~ Łuczaj, L. Ethnobotanical review of wild edible plants of Slovakia. Act Soc Bot Pol. 2012, 81; <http://doi.org/10.5586/asbp.2012.030>. 1385
- ~~1295.~~ Segura, S.; Fresnedo, J.; Mathuriau, C.; López, J.; Andrés, J.; Muratalla, A. The edible fruit species in Mexico. Genet. Resour. Crop Evol. 2018, 65, 1767-1793; <http://doi.org/10.1007/s10722-018-0652-3>. 1386
- ~~130.~~ Mondragón-Jacobo, C.; Pérez-González, S.; Arias, E.; Reynolds, S.G.; Sánchez, M.D. Cactus (*Opuntia*) as forage. FAO Plant Production and Protection Paper 169. FAO: México, 2001. 1387
- ~~13196.~~ Kargioğlu, M.; Cenkci, S.; Serteser, A.; Konuk, M.; Vural, G. Traditional uses of wild plants in the Middle Aegean Region of Turkey. Hum Ecol. 2010, 38, 429-450; <https://doi.org/10.1007/s10745-010-9318-2>. 1388
- ~~132.~~ Delgado-Salinas, A.; Torres-Colín, L.; Luna-Cavazos, M.; Bye, R. Diversity of useful Mexican legumes: Analyses of herbarium specimen records. Diversity. 2021, 13, 267; <http://doi.org/10.3390/d13060267>. 1389
- ~~133.~~ Bullock, S.H.; Heath, D. Growth rates and age of native palms in the Baja California desert. J Arid Env. 2006, 67, 931-402; <http://doi.org/10.1016/j.jaridenv.2006.03.002>. 1390
- ~~134.~~ Reinhard, K.J.; Chaves, S.M.; Jones, J.G.; Iniguez, A.M. Evaluating chloroplast DNA in prehistoric Texas coprolites: medicinal, dietary, or ambient ancient DNA? J Archaeol Sci. 2008, 35, 1748-1755; <http://doi.org/10.1016/j.jas.2007.11.013>. 1391
- ~~135.~~ Stone, D.E. Juglandaceae (*Carya*). Flora of North America Vol 3. Accessed 18 Jan 2022. <http://eFloras.org>. 1392
- ~~136.~~ Casas, A.; Caballero, J.; Valiente-Banuet, A. Use, management and domestication of columnar cacti in South Central Mexico: A historical perspective. J Ethnobiol. 1999, 19, 71-95. 1393
- ~~97137.~~ De-la-Torre, L.; Cummins, I.; Logan-Hines, E. *Agave americana* and *Furcraea andina*: Key species to Andean cultures in Ecuador. Bot Sci. 2018, 96, 246-266; <http://doi.org/10.17129/botsci.1813>. 1394
- ~~138.~~ Figueredo Urbina, C.J.; Álvarez-Ríos, G.D.; Cortés-Zárraga, L. Edible flowers commercialized in local markets of Pachuca de Soto, Hidalgo, Mexico. Bot Sci. 2022, 100, 120-138; <http://doi.org/10.17129/botsci.2831>. 1395
- ~~139.~~ Oldfield, S. Cactus and succulent plants. 1st ed. IUCN: Zebra, Cheltenham, UK, 1997. 1396
- ~~140.~~ Junsongduang, A.; Sirithip, K.; Inta, A.; Nachai, R.; Onputtha, B.; Tanming, W.; Balslev, H. Diversity and traditional knowledge of textile dyeing plants in northeastern Thailand. Econ Bot. 2017, 71, 241-255; <http://doi.org/10.1007/s12231-017-9390-2>. 1397

- ~~98~~141. Hamblin-Hart, K.; Cox, P.A. A cladistic approach to comparative ethnobotany: dye plants of the southwestern United States. *J Ethnobiol.* 2000, 2082, 303-325.
99. Casas, A.; Caballero, J.; Valiente-Baunet, A. Use, management and domestication of columnar cacti in South Central Mexico: A historical perspective. *J Ethnobiol.* 1999, 19, 71-95.
100. Figueredo-Urbina, C.I.; Álvarez-Ríos, G.D.; Cortés-Zárraga, L. Edible flowers commercialized in local markets of Pachuca de Soto, Hidalgo, Mexico. *Bot Sci.* 2022, 100, 120-138; <http://doi.org/10.17129/botsci.2831>.
101. Pike, C.C.; Williams, M.; Brennan, A.; Woeste, K.; Jacobs, J.; Hoban, S.; Moore, M.; Romero-Severson, J. Save our species: A blueprint for restoring butternut (*Juglans cinerea*) across Eastern North America. *J For.* 2021, 119, 196-206; <http://doi.org/10.1093/jofore/fvaa053>.
- ~~142~~. Pike, C.C.; Williams, M.; Brennan, A.; Woeste, K.; Jacobs, J.; Hoban, S.; Moore, M.; Romero-Severson, J. Save our species: A blueprint for restoring butternut (*Juglans cinerea*) across Eastern North America. *J For.* 2021, 119, 196-206; <http://doi.org/10.1093/jofore/fvaa053>.
- ~~143~~102. Fernandes-de-Araújo, F.; de-Paulo, F.D.; Neri-Numa, I.A.; Pastore, G.M. Underutilized plants of the Cactaceae family: Nutritional aspects and technological applications. *Food Chem.* 2021, 362, 130196; <http://doi.org/10.1016/j.foodchem.2021.130196>.
- ~~144~~103. Felger, R.S.; Joyal, E. The palms (Arecaceae) of Sonora, Mexico. *Aliso.* 1999, 18, 1-18.
104. Saslis-Lagoudakis, C.H.; Klitgaard B.B.; Forest, F.; Francis, L.; Savolainen, V.; Williamson, E.M.; Hawkins, J.A. The use of phylogeny to interpret cross-cultural patterns in plant use and guide medicinal plant discovery: an example from *Pterocarpus* (Leguminosae). *PlosOne.* 2011, 6, 7, e22275.
105. García-Gómez, Y.; Mendieta-Alcántara, M.R., Mendieta-Zerón, H. *Eryngium heterophyllum* and *Amphipterygium adstringens* tea effect on triglyceride levels; a clinical trial. *Trad Integr Med.* 2019, 4, 22-27; <http://doi.org/10.18502/tim.v4i1.1665>.
- ~~146~~. Farzaei, M.H.; Abbasabadie, Z.; Shams-Ardekani, M.R.; Rahimi, R.; Farzaei, F. Parsley: a review of ethnopharmacology, phytochemistry and biological activities. *J Trad Chin Med.* 2013, 33, 815-826; [http://doi.org/10.1016/S0254-6272\(14\)60018-2](http://doi.org/10.1016/S0254-6272(14)60018-2).
106. Agyare, C.; Appiah, T.; Boakye, Y.D.; Apenteng J.A. *Petroselinum crispum*: a review. In *Medicinal species and vegetables from Africa*. 1st ed.; Academic Press: 2017. p. 527-547.
107. Nieto, G. Biological activities of three essential oils of the Lamiaceae family. *Medicines*, 4, 3, 63; <http://doi.org/10.3390/medicines4030063>.
108. Rolnik, A.; Olas, B. The plants of the Asteraceae family as agents in the protection of human health. *Int. J. Mol. Sci.* 2021, 22, 6, 3009; <http://doi.org/10.3390/ijms22063009>.



**Appendix A.** Families, genera, species and their uses in Iturbide, Nuevo León, Mexico. The letter after author name indicates: N = Native, E = Exotic. The collection number belongs to Eduardo Estrada (EE).

| Scientific name                                                                               | Common name      | Uses (system)                                         | Part used                         | Method of use                                                        |
|-----------------------------------------------------------------------------------------------|------------------|-------------------------------------------------------|-----------------------------------|----------------------------------------------------------------------|
| ACANTHACEAE                                                                                   |                  |                                                       |                                   |                                                                      |
| <i>Hypoestes phyllostachya</i> Baker, E, EE25323                                              | Paleta de pintor | Ornamental                                            | Whole plant                       | Planted in private gardens                                           |
| <i>Beloperone gutatta</i> Brenderge, N, EE25325                                               | Camarón          | Ornamental                                            | Whole plant                       | Planted in private gardens                                           |
| ACERACEAE                                                                                     |                  |                                                       |                                   |                                                                      |
| <i>Acer negundo</i> L., EE25383                                                               | Maple            | Ornamental                                            | Whole plant                       | Planted in public parks and private gardens                          |
| ACTINIDIACEAE                                                                                 |                  |                                                       |                                   |                                                                      |
| <i>Actinidia deliciosa</i> (A.Chev.) C.F.Liang & A.R.Ferguson, E, EE25447                     | Kiwi             | Food                                                  | Fruit (pulp)                      | Raw                                                                  |
| ADOXACEAE                                                                                     |                  |                                                       |                                   |                                                                      |
| <i>Sambucus canadensis</i> L., N, EE25384                                                     | Sauco            | Ornamental                                            | Whole plant                       | Planted in public parks and private gardens                          |
|                                                                                               |                  | Medicinal (respiratory system)                        | Inflorescences and flowers        | Boiled, drink the infusion                                           |
| AMARANTHACEAE                                                                                 |                  |                                                       |                                   |                                                                      |
| <i>Amaranthus palmeri</i> S.Watson, N, EE25326                                                | Quelite          | Food                                                  | Leaves and inflorescences (young) | Cook with oil or raw (previously disinfected with chlorine in water) |
|                                                                                               |                  | Forage Food                                           | Whole plant Leaves                | Raw Boiled, lique                                                    |
| <i>Beta vulgaris</i> subsp. <i>adanensis</i> (Pamukç.) Ford-Lloyd & J.T. Williams, E, EE25448 | Betabel          |                                                       |                                   |                                                                      |
|                                                                                               |                  | medicinal (gastrointestinal system), detoxify the gut | Leaves                            | Raw, boiled or cooked                                                |
|                                                                                               |                  | Dye                                                   | Root                              | Raw, squeezed                                                        |
| <i>Beta vulgaris</i> L. var. <i>cicla</i> L., E, EE25371                                      | Acelga           | Food                                                  | Leaves                            | Raw, boiled or fried.                                                |

|                                                                  |                 |                                                                    |                                           |                                                                    |
|------------------------------------------------------------------|-----------------|--------------------------------------------------------------------|-------------------------------------------|--------------------------------------------------------------------|
| <i>Chenopodium ambrosioides</i> L., N, EE25324                   | Epazote         | Food                                                               | Leaves, inflorescences and flowers        | Boil or cook with beans (to add flavor)                            |
|                                                                  |                 | Medicinal (gastrointestinal system), to eliminate intestinal worms | Leaves, stems, inflorescences and flowers | Boiled, drink the solution                                         |
|                                                                  |                 | Condiment                                                          | Leaves and stems                          | Dry, crushed, added to flavor the food                             |
|                                                                  |                 | Forage                                                             | Whole plant                               | Raw                                                                |
| <i>Spinacia oleracea</i> (L.) E.H.L.Krause, E, EE25449           | Espinaca        | Food                                                               | Leaves                                    | Raw (previously disinfected with chlorine in water)                |
|                                                                  |                 | Medicinal (gastrointestinal system)                                | Leaves                                    | Liquate, raw, to eliminate amoeba.                                 |
| <b>AMARYLLIDACEAE</b>                                            |                 |                                                                    |                                           |                                                                    |
| <i>Crinum asiaticum</i> L., E, 25450                             | Lirio listado   | Ornamental                                                         | Whole plant                               | Planted in private gardens                                         |
| <i>Clivia miniata</i> (Lindl.) Bosse, E, EE25451                 | Clivia          | Ornamental                                                         | Whole plant                               | Planted in private gardens                                         |
| <b>ANACARDIACEAE</b>                                             |                 |                                                                    |                                           |                                                                    |
| <i>Amphipterygium adstringens</i> (Schltdl.) Standl., N, EE25452 | Cuacharalate    | Medicinal (dermic system), antiseptic, antibiotic                  | Bark                                      | Boiled, used as cataplasm, wound washing                           |
| <i>Mangifera indica</i> L., E, EE25454                           | Mango           | Food                                                               | Fruit                                     | Raw, and mixed with green salads                                   |
|                                                                  |                 | Ornamental                                                         | Whole plant                               | Planted in private gardens                                         |
| <i>Rhus trilobata</i> Nutt., N, EE25455                          | Lantrisco, jobo | Ornamental                                                         | Whole plant                               | Planted in private gardens                                         |
|                                                                  |                 | Construction                                                       | Trunks and branches                       | Dry, to make columns of houses, tools and fuel                     |
| <i>Rhus virens</i> Lindh. ex A. Gray, N, EE25456                 | Lantrisco       | Construction of tools and fuel                                     | Trunks and branches                       | Dry, to make columns of houses, tools and fuel                     |
|                                                                  |                 | Forage                                                             | Leaves                                    | Raw                                                                |
| <i>Schinus molle</i> L., E, EE25457                              | Pirul           | Rites (soul cleansing) and religion                                | Small branches and leaves                 | The leaves are rubbed all over the individual's body while praying |

|                                                         |                  |                                                         |                  |                                         |
|---------------------------------------------------------|------------------|---------------------------------------------------------|------------------|-----------------------------------------|
|                                                         |                  | Ornamental                                              | Whole plant      | Planted in private gardens              |
| <b>ANNONACEAE</b>                                       |                  |                                                         |                  |                                         |
| <i>Annona muricata</i> L., N, EE25453                   | Guanábana        | Food                                                    | Fruit            | Raw, or liqued to make fruit drinks     |
| <b>APIACEAE</b>                                         |                  |                                                         |                  |                                         |
| <i>Apium graveolens</i> L., E, EE25327                  | Apio             | Food                                                    | Leaves           | Raw, in salads                          |
|                                                         |                  | Medicinal (blood system), low cholesterol               | Leaves and stems | Raw                                     |
| <i>Coriandrum sativum</i> L., EE25328                   | Cilantro         | Food (condiment)                                        | Leaves           | Raw or cooked in broth                  |
| <i>Cuminum cyminum</i> L., E, EE25329                   | Comino           | Food (condiment)                                        | Seeds            | Cooked with rice and meat               |
| <i>Daucus carota</i> L., E                              | Zanahoria        | Food                                                    | Root             | Raw or cooked with different vegetables |
| <i>Daucus carota</i> L., E, EE25330                     | Hierba del sapo  | Medicinal (urinary system), kidney stones               | Leaves and stems | Boiled, drink the solution              |
| <i>Eryngium heterophyllum</i> Hemsl. & Rose, N, EE25504 | Perejil          | Medicinal (blood system), cholesterol and triglycerides | Root             | Boiled, drink the solution              |
|                                                         |                  | Food                                                    | Leaves adn stems | Raw or cooked with different vegetables |
| <i>Petroselinum crispum</i> (Mill.) Fuss, E, EE25331    |                  | Medicinal (Urinary system)                              | Leaves           | Prevent bladder infections              |
|                                                         |                  | Medicinal (blood system)                                | Leaves           | Purifies the blood                      |
| <b>APOCYNACEAE</b>                                      |                  |                                                         |                  |                                         |
| <i>Cascabela thevetia</i> (L.) Lippold, E, EE25503      | Cascabel         | Ornamental                                              | Whole plant      | Planted in private gardens              |
| <i>Plumeria rubra</i> L., N                             | Ramo de novia    | Ornamental                                              | Whole plant      | Planted in private gardens              |
| <i>Vinca minor</i> L., E, EE25220                       | Teresita         | Ornamental                                              | Whole plant      | Planted in private and public gardens   |
| <b>ARACEAE</b>                                          |                  |                                                         |                  |                                         |
| <i>Spathiphyllum wallisii</i> Regel, N, EE25502         | Cuna de Moisés   | Ornamental                                              | Whole plant      | Planted in private gardens              |
| <i>Anthurium magnificum</i> Linden, N, EE25501          | Anturio, lampazo | Ornamental                                              | Whole plant      | Planted in private gardens              |

|                                                                                      |                     |                |                                                                      |
|--------------------------------------------------------------------------------------|---------------------|----------------|----------------------------------------------------------------------|
| <i>Zantedeschia aethiopica</i> (L.) Spreng., E, Alcatraz 25500                       | Ornamental          | Whole plant    | Planted in private gardens                                           |
| <b>ARECAECEAE</b>                                                                    |                     |                |                                                                      |
| <i>Brahea berlandieri</i> (Kunth) Mart., N, Palmito EE25499                          | Ornamental          | Whole plant    | Planted in private gardens                                           |
|                                                                                      | Rites               | Leaves         | Ornaments in floral bouquets                                         |
|                                                                                      | Construction        | Leafs          | Roofs of houses and cabins                                           |
| <i>Cocos nucifera</i> L., E, EE25385                                                 | Food                | Fruit          | Raw pulp and its water, and to make candies                          |
| <i>Washingtonia filifera</i> (Linden ex André) Palma H.Wendl. ex de Bary, N, EE25386 | Ornamental          | Whole plant    | Planted in private gardens                                           |
|                                                                                      | Construction, roofs | Leaves         | Dry                                                                  |
| <b>ASPARAGACEAE</b>                                                                  |                     |                |                                                                      |
| <i>Agave lechuguilla</i> Torr., N, EE25251                                           | Healthy hair        | Root           | Milled, raw, used as shampoo                                         |
|                                                                                      | Fibers              | Leaves         | Leaves are divided into multiple fibers used to make woven products  |
|                                                                                      | Food                | Root           | Boiled and fermented (to prepare alcoholic beverages)                |
|                                                                                      | Living fences       | Whole plant    | Planted in private gardens                                           |
| <i>Agave americana</i> L. var. americana, N, Maguey EE25251b                         | Food                | Root           | Aguamiel (sap), raw or cooked to make syrup                          |
|                                                                                      | Food (quite)        | Peduncle       | Cooked in a well, with hot stones and firewood, covered for 24 hours |
|                                                                                      | Food                | Flowers        | Cooked                                                               |
|                                                                                      | Food                | Root           | Boiled and fermented (to prepare alcoholic beverages)                |
|                                                                                      | Ornamental          | Whole plant    | Planted in public and private gardens                                |
|                                                                                      | Construction        | Peduncle (dry) | Livestock keeper                                                     |
|                                                                                      | Living fences       | Whole plant    | Planted in private gardens                                           |
| <i>Agave aff. scabra</i> Ortega, N, EE25251c                                         | Food (quite)        | Peduncle       | Cooked in a well, with hot stones and firewood, covered for 24 hours |

|                                                                                                     |                        |                                                |                          |                                                                                                                                                                  |
|-----------------------------------------------------------------------------------------------------|------------------------|------------------------------------------------|--------------------------|------------------------------------------------------------------------------------------------------------------------------------------------------------------|
| <i>Asparagus setaceus</i> Kunth, E, EE25332<br><i>Dasyllirion berlandieri</i> S. Watson, N, EE25253 | Hoja elegante<br>Sotol | Fibers                                         | Leaves                   | Used to make ties                                                                                                                                                |
|                                                                                                     |                        | Living fences                                  | Whole plant              | Planted in private gardens                                                                                                                                       |
|                                                                                                     |                        | Living fences                                  | Whole plant              | Planted in private gardens                                                                                                                                       |
|                                                                                                     |                        | Ornamental                                     | Whole plant              | Planted in private gardens                                                                                                                                       |
|                                                                                                     |                        | Food                                           | Root                     | Boiled and fermented (to prepare alcoholic beverages)                                                                                                            |
|                                                                                                     |                        | Rites and religion                             | Leaves (base)            | With the base of the leaves, structures similar to flowers are made that adorn the main square and streets in the celebration of the patronal feast of San Pedro |
| <i>Polianthes tuberosa</i> L., N, EE25254                                                           | Nardo                  | Ornamental                                     | Whole plant              | Planted in private gardens                                                                                                                                       |
| <i>Sansevieria trifasciata</i> Prin., E, EE25498                                                    | Lengua de suegra       | Ornamental                                     | Whole plant              | Planted in private and public gardens                                                                                                                            |
| <i>Yucca filifera</i> Chabaud, N, EE25155                                                           | Palma china            | Food                                           | Flowers (called chochas) | Raw, collected before opening and the reproductive structures are removed so that when cooking they do not make the food bitter                                  |
| <i>Yucca filifera</i> Chabaud, N, EE25155                                                           | Palma china            | Food                                           | Fuits (called dátiles)   | Raw                                                                                                                                                              |
|                                                                                                     |                        | Food                                           | Fruit                    | Raw                                                                                                                                                              |
|                                                                                                     |                        | Ornamental                                     | Whole plant              | Raw                                                                                                                                                              |
| <i>Yucca treculeana</i> Carrière, N, EE25155b                                                       | Palma samandoca        | Food                                           | Flowers (called chochas) | Raw, collected before opening and the reproductive structures are removed so that when cooking they do not make the food bitter                                  |
|                                                                                                     |                        | Live fences                                    | Whole plant              | Planted in private gardens                                                                                                                                       |
| <b>ASPHODELACEAE</b>                                                                                |                        |                                                |                          |                                                                                                                                                                  |
| <i>Kalanchoe blosfeldiana</i> Poelln., E, EE25152                                                   | Brujita                | Ornamental, for its beautiful fleshy leaves    | Whole plant              | Planted in private gardens                                                                                                                                       |
| <i>Kalanchoe digremontiana</i> Raym.-Hamet & H. Perrier, E, EE25333                                 | Urania                 | Medicinal (endocrin system), anti inflammatory | Sap                      | Raw, drink the sap                                                                                                                                               |
|                                                                                                     |                        | Medicinal (gastric system), heal               | Leaves (pulp)            | Raw, milled, drink the sap                                                                                                                                       |



|                                                         |                                            |  |                                                                           |                  |                                                                    |
|---------------------------------------------------------|--------------------------------------------|--|---------------------------------------------------------------------------|------------------|--------------------------------------------------------------------|
|                                                         |                                            |  | gastrointestinal problems                                                 |                  |                                                                    |
| <b>ASTERACEAE</b>                                       |                                            |  | Ornamental                                                                | Whole plant      | Planted in private gardens                                         |
| <i>Artemisia ludoviciana</i> Nutt., N, EE25256, EE25334 | Estafiate                                  |  | Medicinal (gastrointestinal system), diarrhea, flatulences                | Leaves and stems | Boiled, drink infusion                                             |
| <i>Baccharis salicifolia</i> Nutt, N, EE25258           | Jara, jarilla                              |  | Medicinal (gastro-intestinal system), diarrhea, flatulences               | Leaves and stems | Cut into pieces, boil in water, drink the solution                 |
| <i>Calea oliveri</i> B.L.Rob. & Greenm., N, EE25368     | Ámbula                                     |  | Medicinal (nervous system), insomnia                                      | Leaves           | Boiled in water, drink the solution                                |
| <i>Chrysactinia mexicana</i> A. Gray, N, EE25370        | Hierba de San Nicolás                      |  | Medicinal (Reproductive system), aphrodisiac                              | Leaves           | Boiled in water, drink the solution                                |
| <i>Chrysanthemum morifolium</i> Ramat., EE25222         | Crisantemo                                 |  | Ornamental                                                                | Whole plant      | Planted in private gardens                                         |
| <i>Conyza filaginoides</i> (DC.) Hieron, N, EE25497     | Simonillo                                  |  | Ornamental                                                                | Whole plant      | Planted in private gardens                                         |
|                                                         |                                            |  | Medicinal (gastro-intestinal system), diarrhea, colic                     | Leaves and stems | Boiled in water, drink the solution                                |
|                                                         |                                            |  | Medicinal (endocrine system), diabetes and cancer                         | Leaves and stems | Boiled in water, drink the solution                                |
| <i>Dahlia coccinea</i> Cav., N, EE25388                 | Dalia (the representative plant of Mexico) |  | Ornamental, by its showy and big inflorescences with red external flowers | Whole plant      | Planted in private gardens                                         |
| <i>Flourensia cernua</i> DC., N, EE25387                | Hojasé                                     |  | Medicinal (gastro-intestinal system), constipation                        | Leaves           | Boil only 3-4 leaves, very astringent effect and very bitter taste |

|                                                                      |            |                                                                  |                                                        |                                                                         |
|----------------------------------------------------------------------|------------|------------------------------------------------------------------|--------------------------------------------------------|-------------------------------------------------------------------------|
| <i>Gnaphalium viscosum</i> Kunth, N, EE25389                         | Gordolobo  | Medicinal (respiratory system), cough, throat pain               | Stems, leaves, inflorescences and flowers              | Boiled in water, drink the solution                                     |
| <i>Grindelia inuloides</i> Willd. var. <i>inuloides</i> , N, EE25390 | Árnica     | Medicinal (Skeletal-muscular system), external wounds            | Leaves and inflorescences, boiled, the solution use as | Boiled in hot wtaer, drink the solution                                 |
| <i>Gutierrezia sarothrae</i> (Pursh) Britton & Rusby, N, EE25496     | Amargosa   | Medicinal (broken bones),                                        | Leaves                                                 | Used as plaster (glutinous stems, sticky)                               |
| <i>Gymnosperma glutinosum</i> Less., N, EE25369                      | Marica     | Fibers                                                           | Branches                                               | Dry, they                                                               |
|                                                                      |            | Household items                                                  | Leaves and stems                                       | Dried, intertwine and tie and attach to a stick to make homemade brooms |
| <i>Helianthus annuus</i> L., N, EE24495                              | Girasol    | Forage                                                           | Whole plant                                            | Raw                                                                     |
| <i>Lactuca sativa</i> L., E, EE25391                                 | Lechuga    | Food                                                             | Leaves                                                 | Raw, previosly disinfected with chlorine                                |
| <i>Machaeranthera tanacetifolia</i> (Kunth) Nees, N, EE25494         | Árnica     | Medicinal                                                        | Leaves and inflorescences                              | Boiled, the solution used as cataplasm                                  |
| <i>Matricaria recutita</i> L., E, EE25493                            | Manzanilla | Medicinal (gastro-intestinal system), colic, stomach ache        | Leaves                                                 | Boiled, drink the solution                                              |
| <i>Parthenium hysterophorus</i> L., N, EE25492                       | Amargoso   | Mosquito repellent                                               | Whole plant (dry)                                      | Burning in the yard, the smoke produced repels insects and other pests  |
|                                                                      |            | Household items                                                  | Leaves and stems                                       | Dried, intertwine and tie and attach to a stick to make homemade brooms |
| <i>Tagetes lucida</i> (Sweet) Voss, N, EE25491                       | Yerbanís   | Beverage                                                         | Leaves, stems, inflorescens, and flowers               | Boiled, drink as tea                                                    |
|                                                                      |            | Medicinal (gastro-intestinal system), stomach ache, colic, ulcer | Leaves, stems, inflorescens, and flowers               | Boiled, drink as tea                                                    |

|                                                                    |                      |                                           |                                 |                                            |
|--------------------------------------------------------------------|----------------------|-------------------------------------------|---------------------------------|--------------------------------------------|
| <i>Tanacetum parthenium</i> (L.) Sch.Bip., E, EE25490              | Altamisa             | Mosquito repellent                        | Whole plant                     | Alive, inside the house                    |
|                                                                    |                      | Medicinal (gastric system), stomach ache  | Leaves and stems                | Boiled, drink the solution                 |
| <i>Taraxacum officinale</i> (L.) Weber ex F. H.Wigg., E, EE25489   | Diente de león       | Food                                      | Leaves                          | Raw (previously disinfected with chlorine) |
| <i>Trixis californica</i> Kellogg, N, EE25488                      | Árnica               | Forage<br>Medicinal                       | Whole plant<br>Leaves and stems | Raw<br>Boiled, drink the solution          |
| <i>Zinnia elegans</i> L., N, EE25335                               | Cartulina            | Ornamental                                | Whole plant                     | Planted in private and public gardens      |
| <b>BALSAMINACEAE</b>                                               |                      |                                           |                                 |                                            |
| <i>Impatiens hawkeri</i> W. Bull, E, EE25219                       | Belén                | Ornamental                                | Whole plant                     | Planted in private gardens                 |
| <b>BEGONIACEAE</b>                                                 |                      |                                           |                                 |                                            |
| <i>Begonia gracilis</i> Kunth, N, EE25236                          | Begonia              | Ornamental                                | Whole plant                     | Planted in private gardens                 |
| <b>BIGNONIACEAE</b>                                                |                      |                                           |                                 |                                            |
| <i>Chilopsis linearis</i> (Cav.) Sweet, N, EE25487                 |                      | Ornamental, by its beautiful flowers      | Whole plant                     | Planted in private and public gardens      |
| <i>Tecoma stans</i> (L.) Juss. ex Kunth, N, EE25218                | Tronadora, San Pedro | Ornamental                                | Whole plant                     | Planted in public and private gardens      |
| <b>BORAGINACEAE</b>                                                |                      |                                           |                                 |                                            |
| <i>Cordia boissieri</i> A. DC., N, EE25157                         | Anacahuita           | Medicinal (Respiratory system), pneumonia | Flowers and fruit (pulp)        | Boiled, drink the infusion                 |
|                                                                    |                      | Ornamental                                | Whole plant                     | Planted in public and private gardens      |
|                                                                    |                      | Forage                                    | Fruits                          | Raw                                        |
| <i>Ehretia anacua</i> (Terán & Berland.) I. M. Johnst., N, EE25163 | Anacua               | Ornamental                                | Whole plant                     | Planted in public and private gardens      |
| <b>BRASSICACEAE</b>                                                |                      |                                           |                                 |                                            |
| <i>Brassica oleracea</i> L., E, EE25486                            | Repollo              | Food                                      | Leaves                          | Raw or cooked with other vegetables.       |

|                                                                                 |              |                                                             |                  |                                                                                     |
|---------------------------------------------------------------------------------|--------------|-------------------------------------------------------------|------------------|-------------------------------------------------------------------------------------|
| <i>Lepidium peruvianum</i> G. Chacón, E, EE25336                                | Raíz peruana | Medicinal (gastrointestinal, endocrin, and urinary systems) | Root             | Boiled, drink the infusion                                                          |
| <i>Rorippa officinale</i> R. Br., E, EE25485                                    | Berro        | Medicinal (endocrin system), problems                       | Leaves and stems | Boiled, eat and drink infusion                                                      |
|                                                                                 |              | Food                                                        | Leaves           | Raw (previously disinfected with chlorine in water) or cooked with other vegetables |
| <i>Raphanus sativus</i> L., E, EE25484                                          | Rábano       | Food                                                        | Root             | Raw, in salads                                                                      |
|                                                                                 |              | Medicinal (respiratory system), problems                    | Root             | Raw, pulp                                                                           |
|                                                                                 |              | Medicinal (Blood system), lower blood pressure              | Root             | Raw, pulp                                                                           |
| <b>BROMELIACEAE</b>                                                             |              |                                                             |                  |                                                                                     |
| <i>Ananas comosus</i> (L.) Merr., E, EE25483                                    | Piña         | Food                                                        | Fruit            | Raw                                                                                 |
|                                                                                 |              | Food                                                        | Fruit juice      | Meat tenderizer                                                                     |
| <i>Hechtia podantha</i> Mez, N, EE25392                                         | Guapilla     | Fibers                                                      | Leaves           | Leaves are divided into multiple fibers used to make woven products (ties)          |
| <i>Tillandsia usneoides</i> (L.) L., N, EE25231                                 | Paixtle      | Rites and religion                                          | Leaves           | Dry, decorate the christmas tree                                                    |
|                                                                                 |              | Manufacture of articles                                     | Leaves           | To make pillows                                                                     |
| <b>BUDDLEJACEAE</b>                                                             |              |                                                             |                  |                                                                                     |
| <i>Buddleja cordata</i> ssp. <i>tomentella</i> (Standl.) E.M.Norman, N, EE25393 | Tepozán      | Medicinal (skeletal-muscular system), general pain          | Leaves           | Boiled in water, the solution used as cataplasm                                     |
| <b>CACTACEAE</b>                                                                |              |                                                             |                  |                                                                                     |

|                                                                           |                  |                                                                            |                                                                                          |                                                                       |
|---------------------------------------------------------------------------|------------------|----------------------------------------------------------------------------|------------------------------------------------------------------------------------------|-----------------------------------------------------------------------|
| <i>Cylindropuntia imbricata</i> (Haw.) F.M.Knuth, N, EE25246              | Coyonoxtle       | Medicinal (skeletal-muscular system), breaks, breaks and fissures of bones | Stems pulp                                                                               | Raw, use as cataplasm, smear the pulp on the injured area and bandage |
| <i>Cylindropuntia leptocaulis</i> (DC.) F.M.Knuth, N, EE25246b            | Tasajillo        | Medicinal (endocrin system) cancer                                         | Stems pulp                                                                               | Boiled, drink the infusion                                            |
| <i>Echinocactus platyacanthus</i> Link & Otto, N, EE25482                 | Biznaga burra    | Food                                                                       | Stem pulp                                                                                | Cooked with piloncillo (brown sugar) to make candies                  |
| <i>Hylocereus undatus</i> (Haw.) Britton & Rose, N, EE25377               | Pithaya          | Food                                                                       | Fruit                                                                                    | Raw, blended with water to make drinks                                |
| <i>Lophophora williamsii</i> (Lem. ex Salm-Dyck) J.M. Coult., N, EE25394  | Peyote           | Ornamental                                                                 | Whole plant                                                                              | Planted in private gardens                                            |
|                                                                           |                  | Dye                                                                        | Fruit                                                                                    | Raw, squeezed                                                         |
|                                                                           |                  | Spiritual-religious                                                        | Whole plant                                                                              | Raw, eaten in pieces or blended in water and drink the potion         |
|                                                                           |                  | Medicinal (Skeletal-muscular system)                                       | Whole plant or cut into pieces inside alcohol and mixed with marijuana (Canabis sativa), | Raw, cataplasm, rubbing on sore joints                                |
| <i>Mammillaria heyderi</i> Muehlenpf., N, EE25395                         | Chilitos         | Medicinal (nervous system), insomnia                                       | Pieces of plant                                                                          | Raw, eaten in pieces or blended in water and drink the potion         |
|                                                                           |                  | Ornamental                                                                 | Whole plant                                                                              | Planted in private gardens                                            |
| <i>Myrtillocactus geometrizans</i> (Mart. ex Pfeiff.) Console, N, EE25396 | Garambuyo        | Living fences                                                              | Whole plant                                                                              | Planted in private gardens                                            |
| <i>Opuntia ficus-indica</i> (L.) Mill., N, EE25397                        | Nopal sin espina | Ornamental                                                                 | Whole plant                                                                              | Planted in private gardens                                            |
|                                                                           |                  | Ornamental                                                                 | Whole plant                                                                              | Planted in private gardens                                            |
|                                                                           |                  | Forage                                                                     | Stems (cladodes)                                                                         | Raw, cut into pieces and scorched (to remove thorns)                  |
|                                                                           |                  | Food                                                                       | Stems (cladodes) and fruits                                                              | Peeled and cut into pieces, raw or cooked; fruit eaten raw            |



|                                                |             |                                                        |                                                                     |                                                                        |
|------------------------------------------------|-------------|--------------------------------------------------------|---------------------------------------------------------------------|------------------------------------------------------------------------|
|                                                |             | Medicinal (endocrin system), low cholesterol           | Stems                                                               | Raw, cut into pieces and eat                                           |
| <i>Opuntia lindheimeri</i> Engelm., N, EE25249 | Nopal       | Forage                                                 | Stems (cladodes) and fruits                                         | Raw, cut into pieces and scorched (to remove thorns); fruits eaten raw |
|                                                |             | Food                                                   | Stems                                                               | Raw                                                                    |
|                                                |             | Medicinal (endocrin system), low cholesterol           | Stems                                                               | Raw, stem pulp                                                         |
|                                                |             | Medicinal (gastrointestinal system), improve digestion | Stems                                                               | Raw, stem pulp, liquefied                                              |
| <b>CANNABACEAE</b>                             |             |                                                        |                                                                     |                                                                        |
| <i>Celtis leavigata</i> Willd., N, EE25233b    | Palo blanco | Ornamental                                             | Whole plant                                                         | Planted in private gardens                                             |
| <i>Celtis pallida</i> Torr., N, EE25233        | Granjeno    | Food                                                   | Fruits                                                              | Raw or boiled to make syrup                                            |
|                                                |             | Ornamental                                             | Whole plant                                                         | Planted in private gardens                                             |
| <b>CANNABINACEAE</b>                           |             |                                                        |                                                                     |                                                                        |
| <i>Cannabis sativa</i> L., E, EE25481          | Mariguana   | Medicinal (Skeletal-muscular system)                   | Female inflorescences and leaves into alcohol and mixed with peyote | Cataplasm, rubbing on sore joints                                      |
|                                                |             | Recreational playful use                               | Female inflorescences                                               | Smoked                                                                 |
| <b>CANNACEAE</b>                               |             |                                                        |                                                                     |                                                                        |
| <i>Canna indica</i> L., E, EE25240             | Coyol       | Ornamental, for its beautiful flowers                  | Whole plant                                                         | Planted in private gardens                                             |
| <b>CAPRIFOLIACEAE</b>                          |             |                                                        |                                                                     |                                                                        |
| <i>Lonicera japonica</i> Thunb., E, EE26167    | Madreselva  | Ornamental, for the delicious aroma of its flowers     | Whole plant                                                         | Planted in private gardens                                             |
| <b>CARICACEAE</b>                              |             |                                                        |                                                                     |                                                                        |
| <i>Carica papaya</i> L., N, EE25480            | Papaya      | Food                                                   | Fruit                                                               | Raw, or in fruit salads                                                |

---

**CARYOPHYLLACEAE**

|                                             |           |                                       |             |                            |
|---------------------------------------------|-----------|---------------------------------------|-------------|----------------------------|
| <i>Dianthus caryophyllus</i> L., E, EE25224 | Clavel    | Ornamental, for its beautiful flowers | Whole plant | Planted in private gardens |
| <i>Dianthus deltoides</i> L., E, EE25440    | Clavelina | Ornamental, for its beautiful flowers | Whole plant | Planted in private gardens |
| <i>Gypsophila paniculata</i> L., E, EE25441 | Ilusión   | Ornamental, for its beautiful flowers | Whole plant | Planted in private gardens |

**COMMELINACEAE**

|                                               |                  |                                       |             |                            |
|-----------------------------------------------|------------------|---------------------------------------|-------------|----------------------------|
| <i>Commelina coelestis</i> Willd., N, EE25442 | Hierba del pollo | Ornamental, for its beautiful flowers | Whole plant | Planted in private gardens |
|-----------------------------------------------|------------------|---------------------------------------|-------------|----------------------------|

**COSTACEAE**

|                                            |          |                                       |        |                            |
|--------------------------------------------|----------|---------------------------------------|--------|----------------------------|
| <i>Costus igneus</i> N. E. Br., E, EE25443 | Insulina | Medicinal (endocrin system), diabetes | Leaves | Boiled, drink the infusion |
|--------------------------------------------|----------|---------------------------------------|--------|----------------------------|

**CONVOLVULACEAE**

|                                               |                    |                                              |             |                            |
|-----------------------------------------------|--------------------|----------------------------------------------|-------------|----------------------------|
| <i>Ipomoea batatas</i> (L.) Lam., N, EE25444  | Camote             | Food                                         | Root        | Rosted or boiled           |
| <i>Ipomoea purpurea</i> (L.) Roth, N, EE25445 | Manto de la virgen | Ornamental, for its beautiful purple flowers | Whole plant | Planted in private gardens |

**CRASSULACEAE**

|                                             |             |                                                                                                       |                    |                                         |
|---------------------------------------------|-------------|-------------------------------------------------------------------------------------------------------|--------------------|-----------------------------------------|
| <i>Echeveria simulans</i> Rose, N, EE25446  | Siempreviva | Ornamental, for its beautiful fleshy leaves<br>Medicinal (ophthlmic system), red eyes, irritated eyes | Whole plant<br>Sap | Planted in private gardens<br>Eye drops |
| <i>Sedum diffusum</i> S. Watson, N, EE25437 | Chismes     | Ornamental, for its beautiful fleshy leaves<br>Medicinal (ophthlmic system), red eyes, irritated eyes | Whole plant<br>Sap | Planted in private gardens<br>Eye drops |
| <i>Sedum palmeri</i> S. Watson, N, EE25438  | Deditos     | Ornamental, for its beautiful fleshy leaves                                                           | Whole plant        | Planted in private gardens              |

**CUCURBITACEAE**

|                                                               |             |                |                           |                                                      |
|---------------------------------------------------------------|-------------|----------------|---------------------------|------------------------------------------------------|
| <i>Citrullus lanatus</i> (Thunb.) Matsum. & Nakai, E, EE25151 | Sandía      | Food           | Fruit                     | Raw, cut into pieces                                 |
| <i>Cucumis anguria</i> L., E, EE25364                         | Pepinillo   | Forage (pigs)  | Fruit peel                | Raw                                                  |
|                                                               |             | Food           | Fruit                     | Boiled, into brine                                   |
|                                                               |             | Forage         | Fruit                     | Raw                                                  |
| <i>Cucumis melo</i> L., E, EE25365                            | Melón       | Food           | Fruit                     | Raw, cut into pieces                                 |
|                                                               |             | Forage (pigs)  | Fruit peel                | Raw                                                  |
| <i>Cucurbita ficifolia</i> Bouché, E, EE25366                 | Chilacayote | Food           | Fruit                     | Boiled in water with sugar to make candies           |
|                                                               |             | Forage         | Fruit                     | Raw                                                  |
|                                                               |             | Food           | Fruit                     | Cooked with other vegetables                         |
| <i>Cucurbita moschata</i> Duchesne, N, EE25367                | Calabaza    | Food           | Fruit                     | Cooked or boiled in water with sugar to make candies |
| <i>Cucurbita pepo</i> L., N, EE25439                          | Calabaza    | Forage         | Leaves                    | Raw                                                  |
|                                                               |             | Food           | Fruit                     | Cooked                                               |
|                                                               |             | Food           | Seeds                     | Raw, dried, toasted and salty                        |
|                                                               |             | Forage         | Leaves and fruits         | Raw                                                  |
| <i>Luffa aegyptiaca</i> Mill., E, EE25435                     | Estropajo   | Fibers         | Inner part of dried fruit | To wash dishes or to carve skin for bathing          |
| <i>Sechium edule</i> (Jacq.) Sw., N, EE25479                  | Chayote     | Food           | Fruit                     | Raw, cut into pieces or boiled                       |
| <b>CUPRESSACEAE</b>                                           |             |                |                           |                                                      |
| <i>Cupressus arizonica</i> Greene, N, EE25153                 | Cedro       | Ornamental     | Whole plant               | Planted in public and private gardens                |
|                                                               |             | Fuel           | Wood                      | Dry                                                  |
|                                                               |             | Furniture      | Wood                      | Dry                                                  |
|                                                               |             | Rites-religion | Sap (resin)               | Used as incense during religious prayers             |
|                                                               |             | Construction   | Wood                      | Dry, to make columns and beams of houses             |
| <i>Cupressus lousitanica</i> Mill., E, EE25153a               | Ciprés      | Ornamental     | Whole plant               | Planted in public and private gardens                |
|                                                               |             | Furniture      | Wood                      | Dry                                                  |

|                                                  |                 |     |                                         |                     |                                                |
|--------------------------------------------------|-----------------|-----|-----------------------------------------|---------------------|------------------------------------------------|
|                                                  |                 |     | Fuel                                    | Wood                | Dry                                            |
|                                                  |                 |     | Construction                            | Wood                | Dry, to make columns and beams of houses       |
| <i>Cupressus sempervirens</i> L., E, EE25378     | Pincel          |     | Ornamental                              | Whole plant         | Planted in public and private gardens          |
|                                                  |                 |     | Fuel                                    | Wood                | Dry                                            |
|                                                  |                 |     |                                         | Construction        | Wood, Dry, to make columns and beams of houses |
| <i>Juniperus flaccida</i> Schltdl., N, EE25436   | Táscate         |     | Ornamental                              | Whole plant         | Planted in public and private gardens          |
|                                                  |                 |     | Fuel                                    | Wood                | Dry                                            |
|                                                  |                 |     | Construction                            | Wood                | Dry, to make columns and beams of houses       |
| <i>Thuja occidentalis</i> L., E, EE25172         | Tuya            |     | Ornamental                              | Whole plant         | Planted in public and private gardens          |
| <b>CYCADACEAE</b>                                |                 |     |                                         |                     |                                                |
| <i>Cycas revoluta</i> Thunb., N, EE25434         | Chamal, cica    |     | Ornamental                              | Whole plant         | Planted in public and private gardens          |
| <i>Dioon edule</i> Lindl., N, EE25375            | Chamal          |     | Ornamental                              | Whole plant         | Planted in public and private gardens          |
|                                                  |                 |     | Food                                    | Seeds               | To make flour and tortillas                    |
| <b>EBENACEAE</b>                                 |                 |     |                                         |                     |                                                |
| <i>Diospyros palmeri</i> Eastw., N, EE25432      | Chapote         |     | Ornamental                              | Whole plant         | Planted in public and private gardens          |
|                                                  |                 |     | Forage                                  | Fruits              | Raw, for cattle, sheeps, goats and pigs        |
|                                                  |                 |     | Fuel                                    | Trunks and branches | Dry                                            |
|                                                  |                 |     | Construction                            | Wood                | Dry, to make columns and beams of houses       |
| <b>EQUISETACEAE</b>                              |                 |     |                                         |                     |                                                |
| <i>Equisetum laevigatum</i> A. Braun, N, EE25433 | Cola de caballo |     | Medicinal (urinary system), kidney pain | Stems               | Boiled, drink the infusion                     |
| <b>EUPHORBIACEAE</b>                             |                 |     |                                         |                     |                                                |
| <i>Acalypha hederacea</i> Torr., N, EE25173      | Hierba cáncer   | del | Medicinal (endocorin system), cancer    | Leaves and stems    | Boiled, drink the solution                     |
|                                                  |                 |     | Forage                                  | Whole plant         | Raw                                            |

|                                                             |                  |                                                     |                   |                                              |
|-------------------------------------------------------------|------------------|-----------------------------------------------------|-------------------|----------------------------------------------|
| <i>Croton suaveolens</i> Torr., N, EE25478                  | Salvia           | Medicinal (blood system), anemia                    | Leaves and stems  | Boiled in water, drink the infusion          |
| <i>Euphorbia pulcherrima</i> Willd. ex Klotzsch, N, EE25156 | Noche buena      | Ornamental                                          | Whole plant       | Planted in public and private gardens        |
| <i>Euphorbia dentata</i> Michx., N, EE25261                 | Golondrina       | Medicinal (Respiratory system), sinusitis           | Leaves and stems  | Boil in water, e infusion used a nasal drops |
| <i>Euphorbia milii</i> Des Moul., E, EE25261b               | Corona de Cristo | Ornamental                                          | Whole plant       | Planted in public and private gardens        |
| <i>Jatropha dioica</i> Sessé, N, EE25431                    | Sangre de Drago  | Medicinal (dermatologic system), hair growth, fungi |                   | Milled, the pulp used as shampoo             |
|                                                             |                  | Medicinal (gastric system), harden the gums         | Leaves and stems  | Milled, chew and spit out the pulp           |
| <i>Ricinus communis</i> L., E, EE25159                      | Higuerilla       | Ornamental                                          | Whole plant       | Planted in public and private gardens        |
| <i>Sapium sebiferum</i> (L.) Roxb., E, EE25164              | Sapium           | Ornamental                                          | Whole plant       | Planted in public and private gardens        |
| <i>Tragia ramosa</i> Torr., N, EE25363                      | Mala mujer       | Medicinal (urinary system), kidney diseases         | Leaves            | Boiled, drink the infusion                   |
| <b>FABACEAE</b>                                             |                  |                                                     |                   |                                              |
| <i>Arachis hypogaea</i> L., E, EE25429                      | Cacahuete        | Food                                                | Seeds             | Raw                                          |
|                                                             |                  | Forage                                              | Leaves            | Raw                                          |
| <i>Bauhinia purpurea</i> L., N, EE25225                     | Pata de vaca     | Ornamental                                          | Whole plant       | Planted in public and private gardens        |
|                                                             |                  | Medicinal (gastrointestinal system)                 | Leaves            | Boiled, drink the infusion                   |
| <i>Calliandra conferta</i> A.Gray, N, EE25430               | Charrasquillo    | Forage                                              | Leaves and fruits | Raw                                          |
| <i>Cercis canadensis</i> L., N, EE25165                     | Duraznillo       | Ornamental                                          | Whole plant       | Planted in public and private gardens        |
| <i>Cicer arietinum</i> L., E, EE25379                       | Garbanzo         | Food                                                | Seeds             | Cooked                                       |

|                                                                                       |           |              |                         |                                                                                 |
|---------------------------------------------------------------------------------------|-----------|--------------|-------------------------|---------------------------------------------------------------------------------|
| <i>Erythrostemon mexicanus</i> (A. Gray) Gagnon & G. P. Lewis, N, EE25229             | Potro     | Ornamental   | Whole plant             | Planted in public and private gardens                                           |
| <i>Eysenhardtia texana</i> Scheele, N, 25477                                          | Palo azul | Ornamental   | Whole plant             | Planted in public and private gardens                                           |
| <i>Lens culinaris</i> Medik, E, EE25428                                               | Lenteja   | Food         | Seeds                   | Cooked                                                                          |
| <i>Pachyrhizus erosus</i> (L.) Urb., N, EE25476                                       | Jicama    |              |                         |                                                                                 |
| <i>Phaseolus vulgaris</i> L., N, EE25475                                              | Frijol    | Food         | Seeds                   | Cooked                                                                          |
| <i>Pisum sativum</i> L., E, EE25474                                                   | Chícharo  | Food         | Seeds                   | Cooked                                                                          |
| <i>Prosopis glandulosa</i> var. <i>torreyana</i> (L.D.Benson) M.C.Johnst., N, EE25473 | Mezquite  | Construction | Tunks and branches      | Dry, to make columns and beams of houses                                        |
|                                                                                       |           | Fuel         | Tunks and branches      | Charcoal                                                                        |
|                                                                                       |           | Forage       | Leaves and fruits       | Raw                                                                             |
| <i>Vachellia farnesiana</i> (L.) Wight & Arn., N, EE25234                             | Huizache  | Construction | Tunks and branches      | Dry                                                                             |
|                                                                                       |           | Fuel         | Tunks and branches      | Charcoal                                                                        |
|                                                                                       |           | Forage       | Leaves and fruits       | Raw                                                                             |
| <i>Vicia faba</i> L., E, EE25238                                                      | Haba      | Food         | Seeds                   | Cooked                                                                          |
| <b>FAGACEAE</b>                                                                       |           |              |                         |                                                                                 |
| <i>Quercus virginiana</i> Mill., N, EE25166                                           | Encino    | Construction | Wood                    | Dry, to manufacture furniture and household goods                               |
|                                                                                       |           | Forage       | Seeds (called bellotas) | Raw                                                                             |
|                                                                                       |           | Fuel         | Wood                    | Dry, cut into pieces                                                            |
| <i>Quercus canbyi</i> Trel., N, EE25427                                               | Encino    | Ornamental   | Whole plant             | Planted in public and private gardens                                           |
|                                                                                       |           | Ornamental   | Whole plant             | Planted in public and private gardens                                           |
|                                                                                       |           | Construction | Wood                    | Dry, to manufacture furniture, household goods, and columns and beams of houses |
|                                                                                       |           | Forage       | Seeds (called bellotas) | Raw                                                                             |
|                                                                                       |           | Fuel         | Wood                    | Dry, cut into pieces                                                            |



|                                                           |                   |               |                         |                                                                                         |
|-----------------------------------------------------------|-------------------|---------------|-------------------------|-----------------------------------------------------------------------------------------|
| <i>Quercus polymorpha</i> Schltdl. & Cham., N, EE25426    | Encino            | Construction  | Wood                    | Dry, to manufacture furniture, household goods, and columns and beams of houses         |
|                                                           |                   | Ornamental    | Whole plant             | Planted in public and private gardens                                                   |
|                                                           |                   | Ornamental    | Whole plant             | Planted in public and private gardens                                                   |
|                                                           |                   | Forage        | Seeds (called bellotas) | Raw                                                                                     |
|                                                           |                   | Fuel          | Wood                    | Dry, cut into pieces                                                                    |
|                                                           |                   | Construction  | Wood                    | To manufacture furniture and household goods                                            |
| FOUQUERACEAE                                              |                   |               |                         |                                                                                         |
| <i>Fouquieria splendens</i> Engelm., N, EE25380           | Ocotillo, albarda | Living fences | Stems                   | Stems are cut and planted in rows, eventually producing root and leaves (living fences) |
| GERANIACEAE                                               |                   | Ornamental    | Whole plant             | Planted in private gardens                                                              |
|                                                           |                   | Ornamental    | Whole plant             | Planted in private gardens                                                              |
| <i>Pelargonium hortorum</i> L.H. Bailey, E, EE25227       | Geranio           |               |                         |                                                                                         |
| GESNERIACEAE                                              |                   |               |                         |                                                                                         |
| <i>Tulipa gesneriana</i> L., E, EE25472                   | Tulipán           | Ornamental    | Whole plant             | Planted in private gardens                                                              |
| HYDRANGEECEAE                                             |                   |               |                         |                                                                                         |
| <i>Hydrangea macrophylla</i> (Thunb.) Ser., E, EE25471    | Hortensia         | Ornamental    | Whole plant             | Planted in private gardens                                                              |
| JUGLANDACEAE                                              |                   |               |                         |                                                                                         |
| <i>Carya illinionensis</i> (Wangenh.) K. Koch, N, EE25168 | Nogal             | Forage        | Leaves                  | Raw                                                                                     |
|                                                           |                   | Food          | Fruit                   | Raw                                                                                     |
|                                                           |                   | Construction  | Wood                    | Dry                                                                                     |
|                                                           |                   | Fuel          | Wood                    | Dry                                                                                     |
|                                                           |                   | Ornamental    | Whole plant             | Planted in public and private gardens                                                   |

|                                                                       |                           |                                                             |                  |                                                               |
|-----------------------------------------------------------------------|---------------------------|-------------------------------------------------------------|------------------|---------------------------------------------------------------|
|                                                                       |                           | Medicinal (endocrin system), diabetes                       | Fruit            | Raw                                                           |
|                                                                       |                           | Medicinal (dermic system), hair dye                         | Bark             | Boiled in water, wash hair with solution                      |
| <i>Carya myristiciformis</i> (F. Michx.) Nutt. ex Elliott, N, EE25470 | Nogal                     | Ornamental                                                  | Whole plant      | Planted in public and private gardens                         |
|                                                                       |                           | Medicinal (dermic system), hair dye                         | Bark             | Boiled in water, wash hair with solution                      |
| <i>Juglans major</i> (Torr.) A. Heller, N, EE25469                    | Nogal de nuez encarcelada | Forage                                                      | Leaves           | Raw                                                           |
|                                                                       |                           | Food                                                        | Fruit            | Raw                                                           |
|                                                                       |                           | Construction                                                | Wood             | Dry                                                           |
|                                                                       |                           | Fuel                                                        | Wood             | Dry                                                           |
|                                                                       |                           | Ornamental                                                  | Whole plant      | Planted in public and private gardens                         |
|                                                                       |                           | Medicinal (dermic system), hair dye                         | Bark             | Boiled in water, wash hair with solution                      |
|                                                                       |                           | Medicinal (gastrointestinal system), colics                 | Leaves           | Boiled in water                                               |
| <b>LAMIACEAE</b>                                                      |                           |                                                             |                  |                                                               |
| <i>Hedeoma drummondii</i> Benth., N, EE25468                          | Poleo                     | Medicinal (Nervous system), to fall asleep                  | Whole plant      | Boiled, drink the infusion                                    |
| <i>Lavandula angustifolia</i> Mill., E                                | Lavanda                   | Ornamental                                                  | Whole plant      | Planted in public and private gardens                         |
| <i>Marrubium vulgare</i> L., E, EE25424                               | Marrubio                  | Medicinal (gastro-intestinal system)                        | Leaves           | Boiled, drink the solution                                    |
|                                                                       |                           | Medicinal (respiratory system), cough                       | Leaves and stems | Boiled, drink the infusion, chew and swallow leaves and stems |
| <i>Melissa officinalis</i> L., E, EE25425                             | Toronjil                  | Ornamental, for its delicious aroma and to repel mosquitoes | Whole plant      | Planted in private gardens                                    |

|                                                                                     |                         |                                                                  |                  |                                                                   |
|-------------------------------------------------------------------------------------|-------------------------|------------------------------------------------------------------|------------------|-------------------------------------------------------------------|
| <i>Mentha piperita</i> L., E, EE25241                                               | Yerbabuena              | Medicinal (gastro-intestinal system), colics                     | Leaves and stems | Boiled, drink the infusion                                        |
|                                                                                     |                         | Medicinal (respiratory system), cough                            | Leaves and stems | Boiled, drink the infusion                                        |
|                                                                                     |                         | Medicinal (respiratory system), cough                            | Leaves and stems | Boiled, drink the infusion, chew and swallow leaves and stems     |
|                                                                                     |                         | Medicinal (respiratory system), fever and cold                   | Leaves and stems | Boiled, drink the infusion                                        |
| <i>Mentha spicata</i> L., E, EE25241b                                               | Yerbabuena              | Medicinal (gastro-intestinal system), spasms                     | Leaves and stems | Boiled, drink the infusion                                        |
|                                                                                     |                         | Medicinal (respiratory system), flu and asthma                   | Leaves           | Boiled, drink the infusion                                        |
| <i>Monarda citriodora</i> var. <i>austromontana</i> (Epling) B.L.Turner, N, EE25381 | Poleo cabezón, betónica | Medicinal (respiratory system), cough                            | Leaves and stems | Boiled, drink the infusion, chew and swallow leaves and stems     |
|                                                                                     |                         | Medicinal (Nervous system), to fall asleep                       | Leaves           | Dry, put a piece of branch under the pillow at night              |
|                                                                                     |                         | Ornamental, for its delicious aroma and beautiful flowers        | Whole plant      | Planted in private gardens                                        |
| <i>Ocimum basilicum</i> L., E, EE25242                                              | Albahaca                | Medicinal (Nervous system), used agians insomnia, to fall asleep | Leaves and stems | Boiled, drink the infusion                                        |
|                                                                                     |                         | Religious rites                                                  | Whole plant      | Part of the flower bouquets used in pilgrimages                   |
| <i>Origanum majorana</i> L., E, EE25257                                             | Orégano                 | Food (condiment)                                                 | Leaves           | Dry, added to broths and soups                                    |
|                                                                                     |                         | Medicinal (respiratory system), cough and cold                   | Leaves and stems | Boiled, drink the infusion                                        |
| <i>Plectranthus coleoides</i> Benth., E, EE25362                                    | Vaporú                  | Medicinal (respiratory system), cough                            | Leaves and stems | Milled, mixed with glycerine and spread on the chest and nostrils |
|                                                                                     |                         | Religious rites                                                  | Whole plant      | Dry, milled, used as incense                                      |

|                                                  |                 |    |                                                          |                           |                                             |
|--------------------------------------------------|-----------------|----|----------------------------------------------------------|---------------------------|---------------------------------------------|
|                                                  |                 |    | Ornamental, by its delicious aroma and beautiful flowers | Whole plant               | Planted in private gardens                  |
| <i>Poliomintha longiflora</i> A.Gray, N, EE25259 | Orégano montaña | de | Food (condiment)                                         | Leaves and stems          | Dry, added to broths and soups              |
|                                                  |                 |    | Medicinal (respiratory system), cough, throat pain       | Leaves and stems          | Boiled, drink the infusion                  |
|                                                  |                 |    | Ornamental, by its beautiful flowers and aroma           | Whole plant               | Planted in private gardens                  |
| <i>Rosmarinus officinalis</i> L., E, EE25382     | Romero          |    | Medicinal (gastro-intestinal system) colics              | Leaves                    | Boiled, drink the infusion                  |
|                                                  |                 |    | Medicinal (respiratory system), nasal congestion         | Stems, leaves and flowers | Cut into pieces, boiled, drink the infusion |
|                                                  |                 |    | Ornamental, by its beautiful flowers and aroma           | Whole plant               | Planted in private gardens                  |
| <i>Scutellaria</i> sp., N, EE25422               | Mirto           |    | Condiment                                                | Leaves                    | Dry, added to flavor the food               |
|                                                  |                 |    | Ornamental, by its beautiful flowers and aroma           | Whole plant               | Planted in private gardens                  |
| <i>Teucrium cubense</i> L., N, EE25423           | Verneba         |    | Medicinal (fever)                                        | Leaves and stems          | Boiled, drink the solution                  |
| <i>Thymus vulgaris</i> L., E, EE25360            | Tomillo         |    | Medicinal (respiratory system), cough and expectorant    | Leaves and stems          | Boiled, drink the infusion                  |
|                                                  |                 |    | Medicinal (dermic system), dermic infections             | Leaves                    | Boilded, use as cataplasm                   |
|                                                  |                 |    | Food (condiment)                                         | Leaves and stems          | Dry, add to stews, soups and broths         |

---

**LAURACEAE**

|                                              |           |                                                           |             |                                            |
|----------------------------------------------|-----------|-----------------------------------------------------------|-------------|--------------------------------------------|
| <i>Cinnamomum verum</i> J.Presl., E, EE25361 | Canela    | Medicinal (gastro-intestinal system), stomach pain, vomit | Bark        | Boiled, drink the infusion                 |
|                                              |           | Medicinal (respiratory system), cough and throat pain     | Bark        | Boiled, drink the infusion                 |
|                                              |           | Medicinal (endocrinal system), diabetes                   | Bark        | Boiled, drink the infusion                 |
|                                              |           | Medicinal (blood system), improve blood circulation       | Bark        | Boiled, drink the infusion                 |
| <i>Litsea glauscecens</i> Kunth, N, EE25359  | Laurel    | Food (condiment)                                          | Leaves      | Dry, add to stews, soups and broths        |
| <i>Persea americana</i> Mill., N, EE25170    | Aguacate  | Ornamental, by its showy green stems                      | Whole plant | Planted in private gardens                 |
|                                              |           | Food                                                      | Fruit       | Raw, used in multiple ways                 |
|                                              |           | Medicinal (respiratory system), asthma                    | Leaves      | Boiled, drink the infusion                 |
|                                              |           | Medicinal (circulatory system), arterial hypertension     | Leaves      | Boiled, drink the infusion                 |
| <i>Persea podadenia</i> S. F. Blake, N       | Salsafrás | Medicinal (circulatory system), anemia                    | Bark        | Cut into pices, boiled, drink the infusion |

**LILIACEAE**

|                                   |         |                                                           |       |                                                 |
|-----------------------------------|---------|-----------------------------------------------------------|-------|-------------------------------------------------|
| <i>Allium cepa</i> L., E, EE25358 | Cebolla | Food                                                      | Stem  | Raw or boiled                                   |
|                                   |         | Medicinal (respiratory system), cough, asthma, flu        | Stem  | Boiled, drink the infusion along with honey bee |
|                                   |         | Medicinal (circulatory system), improve blood circulation | Stems | Boiled, drink the infusion                      |

|                                                     |          |                                                                      |               |                                                                                             |
|-----------------------------------------------------|----------|----------------------------------------------------------------------|---------------|---------------------------------------------------------------------------------------------|
| <i>Allium sativum</i> L., E, EE25421                | Ajo      | Medicinal (circulatory system), low cholesterol, improve circulation | Stems         | Boiled, drink the infusion, raw cutt into pieces, milled                                    |
|                                                     |          | Medicinal (dermic system), dermic wounds                             | Cloves        | Ground garlic cloves, the pulp is smeared on the wound                                      |
|                                                     |          | Medicinal (auditive system), earache                                 | Cloves        | Milled, pulp is semeared inside the ears                                                    |
|                                                     |          | Food (condiment)                                                     | Bulb (clove)  | Raw or boiled, added to mutiple foods                                                       |
|                                                     |          | Religious-rites                                                      | Complete bulb | Dry, several bulbs are braided and hung at the entrance of the houses to ward off bad vibes |
| <i>Allium</i> sp., N, EE25467                       | Cebollín | Medicinal (auditive system)                                          | Bulb          | Raw, milled, the pulp is meared inside the ears                                             |
| <i>Lilium candidum</i> L., E, EE25466               | Lirio    | Ornamental, by its beautiful flowers                                 | Whole plant   | Planted in private gardens                                                                  |
| <b>LOMARIOPSIDACEAE</b>                             |          |                                                                      |               |                                                                                             |
| <i>Nephrolepis exaltata</i> (L.) Schott, N, EE25465 | Helecho  | Ornamental, by its beautiful perennial foliage                       | Whole plant   | Planted in pots in private gardens                                                          |
| <b>LHYTRACEAE</b>                                   |          |                                                                      |               |                                                                                             |
| <i>Heimia salicifolia</i> (Kunth) Link, N, EE25169  | Jarilla  | Medicinal (dermic system), dermatitis                                | Leaves        | Milled, boiled in water, use as cataplam                                                    |
| <i>Lagerstroemia indica</i> L., E, EE25244          | Crespón  | Ornamental, by its beautiful perennial foliage anf showy flowers     | Whole plant   | Planted in pots in public and private gardens                                               |
| <i>Punica granatum</i> L., E, EE25154               | Granada  | Ornamental                                                           | Whole plant   | Planted in private gardens                                                                  |
|                                                     |          | Medicinal (gastro-intestinal system), diarrhea                       | Peel          | Boiled in water, drink the solution                                                         |



|                                                 |                    | Food                                                                                   | Fruit                          | Raw                                                                                                 |
|-------------------------------------------------|--------------------|----------------------------------------------------------------------------------------|--------------------------------|-----------------------------------------------------------------------------------------------------|
| <b>MAGNOLIACEAE</b>                             |                    |                                                                                        |                                |                                                                                                     |
| <i>Magnolia grandiflora</i> L., N, EE25171      | Magnolia           | Ornamental, by its perennial foliage and beautiful white flowers                       | Whole plant                    | Planted in public and private gardens                                                               |
| <b>MALVACEAE</b>                                |                    |                                                                                        |                                |                                                                                                     |
| <i>Alcea rosea</i> L., E, EE25357               | Malva rosa         | Ornamental, by its big and beautiful flowers                                           | Whole plant                    | Planted in private gardens                                                                          |
| <i>Hibiscus denudatus</i> Benth., N, EE25174    | Hibisco            | Ornamental, by its beautiful flowers                                                   | Whole plant                    | Planted in private gardens                                                                          |
| <i>Hibiscus syriacus</i> L., E, EE25417         | Malva              | Ornamental, by its beautiful flowers                                                   | Whole plant                    | Planted in private gardens                                                                          |
| <i>Malva parviflora</i> L., N, EE25418          | Malva de patio     | Medicinal (circulatory system), varicose veins                                         | Fruits and leaves              | Boiled, drink the solution and chew and swallow the ground fruits and leaves                        |
| <i>Tilia mexicana</i> Schltdl., N, EE25419      | Tila               | Medicinal (nervous system) insomnia<br>Ornamental                                      | Dried flowers<br>Whole plant   | Boiled in water, drink the solution<br>Planted in private gardens by its majestic bearing           |
| <i>Sida rhombifolia</i> L., N, EE25420          | Hierba del cochino | Medicinal (gastro-intestinal system) diarrhea                                          | Immature fruits                | Boiled in water, drink the infusion                                                                 |
| <b>MELIACEAE</b>                                |                    |                                                                                        |                                |                                                                                                     |
| <i>Azadirachta indica</i> A.Juss., E, EEEE25265 | Neem (Nim)         | Medicinal (gastro-intestinal system), stomach pain, cramps, constipation<br>Ornamental | Bark<br>Whole plant            | Boiled in water, drink solution<br>Planted in private gardens                                       |
| <i>Melia azedarach</i> L., E, EE25266           | Canelo             | Medicinal (dermic system), wound, skin irritation<br>Ornamental                        | Bark and leaves<br>Whole plant | Boiled, the infusion used as cataplasm in the wounded area<br>Planted in public and private gardens |
| <b>MORACEAE</b>                                 |                    |                                                                                        |                                |                                                                                                     |

|                                                    |           |                                                     |                       |                                                                     |
|----------------------------------------------------|-----------|-----------------------------------------------------|-----------------------|---------------------------------------------------------------------|
| <i>Ficus carica</i> L., E, EE25268                 | Higo      | Food<br>Ornamental                                  | Fruit<br>Whole plant  | Raw or boiled and canned fruit<br>Planted in private gardens        |
|                                                    |           | Medicinal (endocrin system), diabetes               | Fruits; leaves        | Raw; leaves boiled, drink the infusion                              |
| <i>Morus celtidifolia</i> Kunth, N, EE25349        | Mora      | Medicinal (endocrin system), diabetes<br>Ornamental | Fruits<br>Whole plant | Boiled, drink the solution<br>Planted in public and private gardens |
|                                                    |           | Food                                                | Fruits                | Raw                                                                 |
|                                                    |           | Dye                                                 | Fruits                | Raw, squeezed                                                       |
| <b>MORINGACEAE</b>                                 |           |                                                     |                       |                                                                     |
| <i>Moringa oleifera</i> Lam., E, EE25351           | Moringa   | Medicinal (endocrin system), diabetes               | Leaves                | Boiled, drin the infusion                                           |
| <b>MUSSACEAE</b>                                   |           |                                                     |                       |                                                                     |
| <i>Mussa x oleifera</i> Lam., E, EE25415           | Plátano   | Food                                                | Fruit                 | Raw                                                                 |
| <b>MYRTACEAE</b>                                   |           |                                                     |                       |                                                                     |
| <i>Eucalyptus camaldulensis</i> Dehnh., E, EE25416 | Eucalipto | Ornamental                                          | Whole plant           | Planted in private gardens                                          |
|                                                    |           | Medicinal (respiratory system), nasal congestion    | Leaves                | Boiled, drink the infusion                                          |
|                                                    |           | Medicinal (nervous system) stress                   | Leaves                | Boiled, drink the infusion                                          |
| <i>Psidium guajava</i> L., N, EE25228              | Guayaba   | Medicinal (gastro-intestinal system), fever         | Leaves                | Boiled, drink the infusion                                          |
|                                                    |           | Medicinal (gastro-intestinal system), diarrhea      | Fruit                 | Raw, eat several fruits                                             |
|                                                    |           | Food                                                | Fruit                 | Raw, and canned fruits                                              |
|                                                    |           | Medicinal (endocrin system), diabetes               | Leaves                | Boiled, drink the infusion                                          |

|                                                                 |                  |                                                |                                |                                          |
|-----------------------------------------------------------------|------------------|------------------------------------------------|--------------------------------|------------------------------------------|
| <i>Syzygium aromaticum</i> (L.) Merr. & L. M. Perry, E, EE25350 | Clavo            | Food (condiment)                               | Floral buds (immature and dry) | Raw or boiled used in multiple ways      |
|                                                                 |                  | Medicinal (gastro-intestinal), constipation    | Fruits                         | Boiled, drink the infusion or chewed     |
| <b>NYCTAGINACEAE</b>                                            |                  |                                                |                                |                                          |
| <i>Bougainvillea spectabilis</i> Willd., N, EE25223             | Bugambilia       | Ornamental, by its showy flowers               | Whole plant                    | Planted in public and private gardens    |
|                                                                 |                  | Medicinal (respiratory system)                 | Bracts and flowers             | Boiled in water, drink the solution      |
| <i>Mirabilis jalapa</i> L., N, EE25252                          | Maravilla        | Ornamental, by its showy and beautiful flowers | Whole plant                    | Planted in private gardens               |
| <b>OLEACEAE</b>                                                 |                  |                                                |                                |                                          |
| <i>Fraxinus americana</i> L., N, EE25255b                       | Fresno           | Ornamental                                     | Whole plant                    | Planted in public and private gardens    |
|                                                                 |                  | Construction                                   | Wood                           | Dry, to make columns and beams of houses |
| <i>Fraxinus cuspidata</i> Torr., N, EE25255                     | Fresno           | Ornamental, by its beautiful flowers           | Whole plant                    | Planted in public and private gardens    |
| <i>Fraxinus greggi</i> A. Gray, N, EE25255c                     | Barretilla       | Ornamental                                     | Whole plant                    | Planted in public and private gardens    |
|                                                                 |                  | Construction                                   | Wood                           | Dry, piles and columns for houses        |
|                                                                 |                  | Fuel                                           | Wood                           | Dry                                      |
| <i>Jasminum floridum</i> Bunge, E, EE25372                      | Jazmín           | Ornamental                                     | Whole plant                    | Planted in private gardens               |
| <i>Jasminum officinale</i> L., E, EE25372b                      | Jazmin           |                                                |                                |                                          |
| <i>Ligustrum japonicum</i> Thunb., E, EE25162                   | Trueno           | Ornamental                                     | Whole plant                    | Planted in public and private gardens    |
| <b>ONAGRACEAE</b>                                               |                  |                                                |                                |                                          |
| <i>Oenothera rosea</i> L'Hér. ex Aiton, N, EE25413              | Hierba del golpe | Medicinal (dermic system), wounds              | Whole plant                    | Raw, milled, smear in the wounded area   |
| <b>PAPAVERACEAE</b>                                             |                  |                                                |                                |                                          |

|                                                   |           |                  |                                         |                  |                                      |
|---------------------------------------------------|-----------|------------------|-----------------------------------------|------------------|--------------------------------------|
| <i>Hunnemannia fumariifolia</i> EE25348           | Sweet, N, | Amapola de campo | Ornamental, by its showy yellow flowers | Whole plant      | Planted in private gardens           |
| PINACEAE                                          |           |                  |                                         |                  |                                      |
| <i>Pinus cembroides</i> Zucc., N, EE25353         |           | Piñonero         | Food                                    | Seeds            | Raw                                  |
|                                                   |           |                  | Fuel                                    | Wood             | Dry                                  |
|                                                   |           |                  | Ornamental                              | Whole plant      | Planted in private gardens           |
| <i>Pinus greggii</i> Engelm. ex Parl., N, EE25354 |           | Pino             | Fuel                                    | Wood             | Dry                                  |
|                                                   |           |                  | Ornamental                              | Whole plant      | Planted in private gardens           |
| <i>Pinus pseudostrobus</i> Lindl., N, EE25414     |           | Pino blanco      | Fuel                                    | Wood             | Dry                                  |
|                                                   |           |                  | Ornamental                              | Whole plant      | Planted in private gardens           |
|                                                   |           |                  | Rites-religious                         | Resin            | In prayer altars                     |
| PIPERACEAE                                        |           |                  |                                         |                  |                                      |
| <i>Piper nigrum</i> L., E, EE25356                |           | Pimienta         | Food (condiment)                        | Seeds            | Mixed with different meals           |
| PLANTAGINACEAE                                    |           |                  |                                         |                  |                                      |
| <i>Antirrhinum majus</i> L., E, EE25459           |           | Perritos         | Ornamental, by its beautiful flowers    | Whole plant      | Planted in private gardens           |
| <i>Plantago lanceolata</i> L., N, EE25458         |           | Llantés          | Medicinal (endocrin system), cancer     | Leaves           | Boiled in water, drink the infusion  |
| PLUMBAGINACEAE                                    |           |                  |                                         |                  |                                      |
| <i>Plumbago pulchella</i> Boiss., E, EE25158      |           | Júdica           | Ornamental                              | Whole plant      | Planted in private gardens           |
|                                                   |           |                  | Medicinal (dermic system)               | Stems and leaves | Boiled, use the solution as catpalsm |
| POLYGONACEAE                                      |           |                  |                                         |                  |                                      |
| <i>Polygonum punctatum</i> Elliot, N, EE25407     |           | Chilillo         | Ornamental                              | Whole plant      | Planted in private gardens           |
| POACEAE                                           |           |                  |                                         |                  |                                      |
| <i>Arundo donax</i> L., E, EE25408                |           | Carrizo          | Religious-rites                         | Stems            | Religious ornaments                  |
|                                                   |           |                  | Construction                            | Stems            | Roofs                                |
| <i>Avena sativa</i> L., E, EE25373                |           | Avena            | Food                                    | Seeds            | Raw or boiled                        |

|                                                          |                |                                        |                         |                                                                            |
|----------------------------------------------------------|----------------|----------------------------------------|-------------------------|----------------------------------------------------------------------------|
| <i>Bambusa</i> sp., E, EE25374                           |                | Religious-rites                        | Stems                   | Religious ornaments                                                        |
|                                                          |                | Construction                           | Stems                   | Roofs                                                                      |
| <i>Bouteloua curtipendula</i> (Michx.) Torr., N, EE25409 | Banderita      | Forage                                 | Whole plants            | Raw                                                                        |
| <i>Cymbopogon citratus</i> (DC.) Stapf, E, EE25410       | Zacate limón   | Ornamental                             | Whole plant             | Planted in private gardens                                                 |
|                                                          |                | Medicinal (gastrointestinal system)    | Stems and leaves        | Boiled, drink the infusion                                                 |
| <i>Sorghum bicolor</i> (L.) Moench, E, EE25411           | Sorgo          | Forage                                 | Whole plants            | Raw                                                                        |
| <i>Sorghum halepense</i> (L.) Pers., E, EE25412          | Zacate Johnson | Forage                                 | Whole plants            | Raw                                                                        |
| <i>Zea mays</i> L., N, EE25347                           | Maíz           | Food                                   | Fruits (seeds)          | Boiled or cooked with multiple foods                                       |
|                                                          |                | Medicinal (gastrointestinal parasites) | Styles (female flowers) | Boiled in water, drink the solution                                        |
|                                                          |                | Medicinal (urinary system), problems   | Seeds                   | Milled, boiled, drink the solution                                         |
| <b>PORTULACACEAE</b>                                     |                |                                        |                         |                                                                            |
| <i>Portulaca mundula</i> I. M. Johnston, E, 25216        | Verdolaga      | Food                                   | Leaves and stems        | Raw (previously disinfected with chlorine), or cooked with different foods |
|                                                          |                | Ornamental                             | Whole plant             | Planted in private gardens (pots)                                          |
| <b>RANUNCULACEAE</b>                                     |                |                                        |                         |                                                                            |
| <i>Clematis drummondii</i> Torr. & A.Gray, N, EE25405    | Barba de chivo | Ornamental                             | Whole plant             | Planted in private gardens                                                 |
| <b>RHAMNACEAE</b>                                        |                |                                        |                         |                                                                            |
| <i>Colubrina greggii</i> S.Watson, N                     | Colubrina      | Ornamental                             | Whole plant             | Planted in private gardens                                                 |
| <b>ROSACEAE</b>                                          |                |                                        |                         |                                                                            |
| <i>Crataegus mexicana</i> Moc. & Sessé ex DC., N, 25355  | Tejocote       | Medicinal (endocrine system), diabetes | Fruit                   | Raw or boiled, drink the fruit pulp                                        |

|                                                                     |                  |                                                                           |                        |                                       |
|---------------------------------------------------------------------|------------------|---------------------------------------------------------------------------|------------------------|---------------------------------------|
|                                                                     |                  | Medicinal (blood system)                                                  | Fruit                  | Raw or boiled, drink the fruit pulp   |
| <i>Cydonia oblonga</i> Mill., E, EE25346                            | Membrillo        | Food                                                                      | Fruit                  | Raw or boiled to make canned fruits   |
| <i>Eriobotrya japonica</i> (Thunb.) Lindl., E, EE25406              | Níspero          | Food                                                                      | Fruit                  | Raw                                   |
|                                                                     |                  | Medicinal (endocrin and blood system), diabetes and arterial hipertension | Fruit                  | Raw, liquefied in water               |
| <i>Malus domestica</i> Borkh., E, EE25343                           | Manzana          | Food                                                                      | Fruit                  | Raw                                   |
|                                                                     |                  | Food                                                                      | Canned fruits          | Boiled                                |
|                                                                     |                  | Alcoholic beverages                                                       | Fruit                  | Fermented                             |
| <i>Prunus armeniaca</i> L., E, EE25344                              | Chabacano        | Food                                                                      | Fruit                  | Raw                                   |
|                                                                     |                  | Ornamental                                                                | Whole plant            | Planted in private gardens            |
| <i>Prunus domestica</i> L., E, EE25345                              | Ciruelo          | Food                                                                      | Fruit                  | Raw                                   |
| <i>Prunus persica</i> (L.) Batsch, E, EE25150                       | Durazno          | Food                                                                      | Fruit                  | Raw                                   |
|                                                                     |                  | Ornamental                                                                | Whole plant            | Planted in private gardens            |
| <i>Purshia plicata</i> (D.Don) Henr., N, EE25460                    | Rosa de castilla | Medicinal (gastro-intestinal system), diarrhea                            | Leaves                 | Boiled, drink the solution            |
| <i>Rosa montezumae</i> Humb. & Bonpl. ex Redout & Thory, N, EE25461 | Rosa             | Ornamental                                                                | Whole plant            | Planted in private gardens            |
| <b>RUTACEAE</b>                                                     |                  |                                                                           |                        |                                       |
| <i>Casimiroa pringlei</i> (S. Wats.) Engl., N, EE25342              | Manguito         | Ornamental                                                                | Whole plant            | Planted in public and private gardens |
|                                                                     |                  | Food                                                                      | Fruit                  | Raw                                   |
| <i>Citrus limon</i> (L.) Osbeck, E, EE25404                         | Limón            | Food                                                                      | Fruit                  | Raw                                   |
|                                                                     |                  | Medicinal (respiratory system), cough, chest pain, throat pain            | Leaves and fruit juice | Boiled, drink the solution            |



|                                                         |              |                                                                |                                       |                                                               |
|---------------------------------------------------------|--------------|----------------------------------------------------------------|---------------------------------------|---------------------------------------------------------------|
| <i>Citrus sinensis</i> (L.) Osbeck, E, EE25341          | Naranja      | Ornamental                                                     | Whole plant                           | Planted private gardens                                       |
|                                                         |              | Food                                                           | Fruit                                 | Raw                                                           |
|                                                         |              | Medicinal (respiratory system), cough, chest pain, throat pain | Leaves and fruit peel and fruit juice | Boiled, drink the solution                                    |
|                                                         |              | Ornamental                                                     | Whole plant                           | Planted in public and private gardens                         |
| <i>Helietta parvifolia</i> (A. Gray) Benth., N, EE25215 | Barreta      | Ornamental                                                     | Whole plant                           | Planted in public and private gardens                         |
|                                                         |              | Construction                                                   | Wood                                  | Dry, piles and columns for houses, fences (very durable wood) |
|                                                         |              | Ornamental                                                     | Whole plant                           | Planted in public and private gardens                         |
|                                                         |              | Ornamental                                                     | Whole plant                           | Planted in public and private gardens                         |
| <i>Ruta graveolens</i> L., E, EE25221                   | Ruda         | Medicinal (respiratory system), cold                           | Leaves and stems                      | Boiled                                                        |
| <i>Zanthoxylum fagara</i> (L.) Sarg., N, EE25247        | Colima       | Construction                                                   | Wood                                  | Dry, piles and columns for houses                             |
|                                                         |              | Forage                                                         | Leaves                                | Raw                                                           |
|                                                         |              | Medicinal (respiratory system), asthma                         | Leaves                                | Boiled, drink the solution                                    |
|                                                         |              | Medicinal (skeletal-muscular system), arthritis                | Leaves                                | Boiled, drink the solution                                    |
|                                                         |              |                                                                |                                       |                                                               |
| SALICACEAE                                              |              |                                                                |                                       |                                                               |
| <i>Populus mexicana</i> Wesm. Ex DC., N, EE25248        | Álamo, chopo | Ornamental                                                     | Whole plant                           | Planted in public and private gardens                         |
| <i>Salix nigra</i> Marshall, N, EE25462                 | Sauce        | Ornamental                                                     | Whole plant                           | Planted in public and private gardens                         |
|                                                         |              | Fuel                                                           | Wood                                  | Dry                                                           |
| SAPINDACEAE                                             |              |                                                                |                                       |                                                               |
| <i>Koelreuteria paniculata</i> Laxm., E, EE25238        | Alfombrilla  | Ornamental, by its showy, psrsisten fruits                     | Whole plant                           | Planted in private gardens                                    |
| SCROPHULARIACEAE                                        |              |                                                                |                                       |                                                               |

|                                                                                           |                            |                                                     |                     |                                                                             |
|-------------------------------------------------------------------------------------------|----------------------------|-----------------------------------------------------|---------------------|-----------------------------------------------------------------------------|
| <i>Leucophyllum frutescens</i> (Berland.) I. M. Johnston., N, EE25161                     | Cenizo                     | Medicinal (endocrin system), hepatitis              | Whole plant         | Cut into the pieces, boiled, drink and take a bath with the solution        |
|                                                                                           |                            | Ornamental                                          | Whole plant         | Planted in public and private gardens                                       |
|                                                                                           |                            | Religious-rites                                     | Branches and leaves | Part of the floral bouquets used in prayers and pilgrimages                 |
| SOLANACEAE                                                                                |                            |                                                     |                     |                                                                             |
| <i>Capsicum annum</i> var. <i>glabriusculum</i> (Dunal) Heiser & Pickersgill, N, EE25217  | Chile piquín, chile quipín | Food (condiment)                                    | Fruit               | Raw                                                                         |
|                                                                                           |                            | Ornamental                                          | Whole plant         | Planted in public and private gardens                                       |
| <i>Capsicum annum</i> var. <i>glabriusculum</i> (Dunal) Heiser & Pickersgill, N, EE25217b | Chile japonés              | Medicinal (respiratory system), cough, phlegm       | Fruit (milled)      | Liquefied in water, drink (very spicy drink)                                |
|                                                                                           |                            | Food (condiment)                                    | Fruit               | Raw                                                                         |
|                                                                                           |                            | Ornamental                                          | Whole plant         | Planted in public and private gardens                                       |
| <i>Capsicum annum</i> var. <i>glabriusculum</i> (Dunal) Heiser & Pickersgill, N, EE25217c | Chile morrón               | Food (condiment)                                    | Fruit               | Raw                                                                         |
| <i>Capsicum annum</i> var. <i>glabriusculum</i> (Dunal) Heiser & Pickersgill, N, EE25217d | Chile jalapeño             | Food (condiment)                                    | Fruit               | Raw                                                                         |
| <i>Capsicum annum</i> var. <i>glabriusculum</i> (Dunal) Heiser & Pickersgill, N, EE25217e | Chile serrano              | Food (condiment)                                    | Fruit               | Raw                                                                         |
|                                                                                           |                            | Medicinal (respiratory system), cough, phlegm       | Fruit (milled)      | Liquefied in water, drink (very spicy drink)                                |
| <i>Datura stramonium</i> L., N, EE25339                                                   | Toloache                   | Falling in love                                     | Leaves and seeds    | Leaves (boiled in wtaer, drink the solution), seeds (raw, chew and swallow) |
| <i>Lycopersicon esculentum</i> Mill., E, EE25403                                          | Tomate                     | Food                                                | Fruit               | Raw or cooked with other foods                                              |
|                                                                                           |                            | Medicinal (skeletal-muscular system), muscular pain | Fruit               | Raw, pulp, use as cataplasm                                                 |
| <i>Physalis philadelphica</i> Lam., N, EE25260                                            | Tomate fresadilla          | Food                                                | Fruit               | Mixed with other foods, broths, sauces and stews                            |
| <i>Solanum ovigerum</i> Dunal, E, EE25463                                                 | Huevitos                   | Ornamental, by its fruits (egg-like)                | Whole plant         | Planted in private gardens                                                  |

|                                                             |                            |                                                     |                                  |                                                                                        |
|-------------------------------------------------------------|----------------------------|-----------------------------------------------------|----------------------------------|----------------------------------------------------------------------------------------|
| <i>Solanum tuberosum</i> L., E, EE25464                     | Papa                       | Food                                                | Root                             | Mixed with other foods, broths, sauces and stews                                       |
| <b>TURNERACEAE</b>                                          |                            |                                                     |                                  |                                                                                        |
| <i>Turnera diffusa</i> Willd. ex Schult., N, EE25340        | Damiana, hierba del venado | Medicinal (genito-urinary system)                   | Leaves, stems and inflorescences | Boiled in water, drink the solution                                                    |
|                                                             |                            | Forage                                              | Whole plant                      | Raw                                                                                    |
| <b>URTICACEAE</b>                                           |                            |                                                     |                                  |                                                                                        |
| <i>Urtica dioica</i> L., N, EE25402                         | Hiedra                     | Medicinal (blood system), purify the blood          | Whole plant                      | Boiled in water, drink the solution                                                    |
| <b>VERBENCEAE</b>                                           |                            |                                                     |                                  |                                                                                        |
| <i>Lippia graveolens</i> Kunth, N, EE25400                  | Orégano                    | Food (condiment)                                    | Leaves                           | Dry, added to different foods, broths and stews                                        |
| <i>Verbena canescens</i> Kunth, N, EE25401                  | Verbena                    | Medicinal (nervous system), insomnia                | Leaves and stems                 | Boiled in water, drink solution, and bathe with the solution                           |
| <b>VITACEAE</b>                                             |                            |                                                     |                                  |                                                                                        |
| <i>Parthenocissus quinquefolia</i> (L.) Planch., N, EE25160 | Viña virgen                | Ornamental                                          | Whole plant                      | Planted in private gardens                                                             |
| <i>Vitis berlandieri</i> Planch., N, EE25338                | Parra, vid                 | Ornamental<br>Food                                  | Whole plant<br>Fruit             | Planted in private gardens<br>Raw                                                      |
| <b>XANTHORRHOACEAE</b>                                      |                            |                                                     |                                  |                                                                                        |
| <i>Aloe vera</i> (L.) Burm.f., E, EE25250                   | Sábila                     | Medicinal (gastro-intestinal), gastritis            | Leaves                           | Pulp, milled, liquefied, drink the solution                                            |
|                                                             |                            | Medicinal (dermic system), hair restoration; wounds | Leaves                           | Pulp, smear the pulp all over the hair; raw, smear the milled pulp in the wounded area |
|                                                             |                            | Ornamental                                          | Whole plant                      | Planted in private gardens                                                             |
| <b>ZYGOPHYLLACEAE</b>                                       |                            |                                                     |                                  |                                                                                        |

|                                                                       |             |                                                              |                      |        |                                                              |
|-----------------------------------------------------------------------|-------------|--------------------------------------------------------------|----------------------|--------|--------------------------------------------------------------|
| <i>Larrea tridentata</i> (Sessé & Moc. ex DC.)<br>Coville, N, EE25399 | Gobernadora | Medicinal<br>intestinal<br>spasms                            | (gastro-<br>system), | Leaves | Boiled in water, drink the solution                          |
| <b>ZINGIBERACEAE</b><br><i>Zingiber officinale</i> Roscoe, E, EE25398 | Jengibre    | Medicinal<br>system), bad smell                              | (dermic              | Leaves | Boiled in water, wash bad smelling parts of<br>the body      |
|                                                                       |             | Smelly feet                                                  |                      | Leaves | Dry, put leaves inside shoes                                 |
|                                                                       |             | Cleaning the interior of<br>car radiators                    |                      | Leaves | Boiled in water, drain the hot solution into the<br>radiator |
|                                                                       |             | Food (condiment)                                             |                      | Root   | Raw, cut into the pieces                                     |
|                                                                       |             | Medicinal<br>intestinal<br>intestinal inflammation,<br>fever | (gastro-<br>system), | Root   | Raw, iquefied, drink the solution                            |
|                                                                       |             | Medicinal<br>system),<br>wounds                              | (dermic<br>external  | Root   | Raw, milled, smear in the wounded areas                      |

---

|
