# Supplementary material for: Ethnobotany in Iturbide, Nuevo León: The Traditional Knowledge on Plants Used in the Semiarid Mountains of Northeastern Mexico
Source: Preprints.org preprint supplement (doi:10.20944/preprints202208.0414.v1), 2022-08-24
Supplement: Supplementary file 1 [file supplementary]

**Appendix A.** Families, genera, species and their uses in Iturbide, Nuevo León, Mexico. The letter after author name indicates: N = Native, E = Exotic. The collection number belongs to Eduardo Estrada (EE).

| **Scientific name** | **Common name** | **Uses (system)** | **Part used** | **Method of use** |
| --- | --- | --- | --- | --- |
| **ACANTHACEAE** |  |  |  |  |
| *Hypoestes phyllostachya* Baker, E, EE25323 | Paleta de pintor | Ornamental | Whole plant | Planted in private gardens |
| *Beloperone gutatta* Brendegee, N, EE25325 | Camarón | Ornamental | Whole plant | Planted in private gardens |
| **ACERACEAE** |  |  |  |  |
| *Acer negundo* L., EE25383 | Maple | Ornamental | Whole plant | Planted in public parks and private gardens |
| **ACTINIDIACEAE** |  |  |  |  |
| *Actinidia deliciosa* (A.Chev.) C.F.Liang & A.R.Ferguson, E, EE25447 | Kiwi | Food | Fruit (pulp) | Raw |
| **ADOXACEAE** |  |  |  |  |
| Sambucus canadensis L., N, EE25384 | Sauco | Ornamental | Whole plant | Planted in public parks and private gardens |
|  |  | Medicinal (respiratory system) | Inflorescences and flowers | Boiled, drink the infusion |
| **AMARANTHACEAE** |  |  |  |  |
| *Amaranthus palmeri* S.Watson, N, EE25326 | Quelite | Food | Leaves and inflorescences (young) | Cook with oil or raw (previously disinfected with chlorine in water) |
|  |  | Forage | Whole plant | Raw |
| *Beta vulgaris* subsp. *adanensis* (Pamukç.) Ford-Lloyd & J.T. Williams, E, EE25448 | Betabel | Food | Leaves | Boiled, liquate |

| Continued Appendix A | | | | |
| --- | --- | --- | --- | --- |
| **Scientific name** | **Common name** | **Uses (system)** | **Part used** | **Method of use** |
|  |  | medicinal (gastrointestinal system), detoxify the gut | Leaves | Raw, boiled or cooked |
|  |  | Dye | Root | Raw, squeezed |
| *Beta vulgaris* L. var. cicla L., E, EE25371 | Acelga | Food | Leaves | Raw, boiled or fried. |
| *Chenopodium ambrosioides* L., N, EE25324 | Epazote | Food | Leaves, inflorescences and flowers | Boil or cook with beans (to add flavor) |
|  |  | Medicinal (gastrointestinal system), to eliminate intestinal worms | Leaves, stems, inflorecences and flowers | Boiled, drink the solution |
|  |  | Condiment | Leaves and stems | Dry, crushed, added to flavor the food |
|  |  | Forage | Whole plant | Raw |
| *Spinacia oleracea* (L.) E.H.L.Krause, E, EE25449 | Espinaca | Food | Leaves | Raw (previusly disinfected with chlorine in water) |
|  |  | Medicinal (gastrointestinal system) | Leaves | Liquate, raw, to eliminate amoeba. |
| **AMARYLLIDACEAE** |  |  |  |  |
| *Crinum asiaticum* L., E, 25450 | Lirio listado | Ornamental | Whole plant | Planted in private gardens |
| *Clivia miniata* (Lindl.) Bosse, E, EE25451 | Clivia | Ornamental | Whole plant | Planted in private gardens |
| **ANACARDIACEAE** |  |  |  |  |
| *Amphipterygium adstringens* (Schltdl.) Standl., N, EE25452 | Cuacharalate | Medicinal (dermic system), antiseptic, antibiotic | Bark | Boiled, used as cataplasm, wound washing |
| *Mangifera indica* L., E, EE25454 | Mango | Food | Fruit | Raw, and mixed with green salads |
|  |  | Ornamental | Whole plant | Planted in private gardens |
| *Rhus trilobata* Nutt., N, EE25455 | Lantrisco, jobo | Ornamental | Whole plant | Planted in private gardens |
|  |  | Construction | Trunks and branches | Dry, to make columns of houses, tools and fuel |
| *Rhus virens* Lindh. ex A. Gray, N, EE25456 | Lantrisco | Construction of tools and fuel | Trunks and branches | Dry, to make columns of houses, tools and fuel |
|  |  | Forage | Leaves | Raw |
| *Schinus molle* L., E, EE25457 | Pirul | Rites (soul cleansing) and religion | Small branches and leaves | The leaves are rubbed all over the individual's body while praying |
|  |  | Ornamental | Whole plant | Planted in private gardens |
| **ANNONACEAE** |  |  |  |  |
| *Annona muricata* L., N, EE25453 | Guanábana | Food | Fruit | Raw, or liqued to make fruit drinks |
| **APIACEAE** |  |  |  |  |
| *Apium graveolens* L., E, EE25327 | Apio | Food | Leaves | Raw, in salads |
|  |  | Medicinal (blood system), low cholesterol | Leaves and stems | Raw |
| *Coriandrum sativum* L., EE25328 | Cilantro | Food (condiment) | Leaves | Raw or cooked in broth |
| *Cuminum cyminum* L., E, EE25329 | Comino | Food (condiment) | Seeds | Cooked with rice and meat |
| *Daucus carota* L., E | Zanahoria | Food | Root | Raw or cooked with different vegetables |
| *Daucus carota* L., E, EE25330 | Hierba del sapo | Medicinal (urinary system), dissolve kidney stones | Leaves and stems | Boiled, drink the solution |
| *Eryngium heterophyllum* Hemsl. & Rose, N, EE25504 | Perejil | Medicinal (blood system), Low cholesterol and triglycerides | Root | Boiled, drink the solution |
|  |  | Food | Leaves adn stems | Raw or cooked with different vegetables |
| *Petroselinum crispum* (Mill.) Fuss, E, EE25331 |  | Medicinal (Urinary system) | Leaves | Prevent bladder infections |
|  |  | Medicinal (blood system) | Leaves | Purifies the blood |
| **APOCYNACEAE** |  |  |  |  |
| *Cascabela thevetia* (L.) Lippold, E, EE25503 | Cascabel | Ornamental | Whole plant | Planted in private gardens |
| *Plumeria rubra* L., N | Ramo de novia | Ornamental | Whole plant | Planted in private gardens |
| *Vinca minor* L., E, EE25220 | Teresita | Ornamental | Whole plant | Planted in private and public gardens |
| **ARACEAE** |  |  |  |  |
| *Spathiphyllum wallisii* Regel, N, EE25502 | Cuna de Moisés | Ornamental | Whole plant | Planted in private gardens |
| *Anthurium magnificum* Linden, N, EE25501 | Anturio, lampazo | Ornamental | Whole plant | Planted in private gardens |
| *Zantedeschia aethiopica* (L.) Spreng., E, 25500 | Alcatraz | Ornamental | Whole plant | Planted in private gardens |
| **ARECAECEAE** |  |  |  |  |
| *Brahea berlandieri* (Kunth) Mart., N, EE25499 | Palmito | Ornamental | Whole plant | Planted in private gardens |
|  |  | Rites | Leaves | Ornaments in floral bouquets |
|  |  | Construction | Leafs | Roofs of houses and cabins |
| *Cocos nucifera* L., E, EE25385 | Coco | Food | Fruit | Raw pulp and its water, and to make candies |
| *Washingtonia filifera* (Linden ex André) H.Wendl. ex de Bary, N, EE25386 | Palma | Ornamental | Whole plant | Planted in private gardens |
|  |  | Construction, roofs | Leaves | Dry |
| **ASPARAGACEAE** |  |  |  |  |
| *Agave lechuguilla* Torr., N, EE25251 | Lechugilla | Healthy hair | Root | Milled, raw, used as shampoo |
|  |  | Fibers | Leaves | Leaves are divided into multiple fibers used to make woven products |
|  |  | Food | Root | Boiled and fermented (to prepare alcoholic beverages) |
|  |  | Living fences | Whole plant | Planted in private gardens |
| *Agave americana* L. var. americana, N, EE25251b | Maguey | Food | Root | Aguamiel (sap), raw or cooked to make syrup |
|  |  | Food (quiote) | Peduncle | Cooked in a well, with hot stones and firewood, covered for 24 hours |
|  |  | Food | Flowers | Cooked |
|  |  | Food | Root | Boiled and fermented (to prepare alcoholic beverages) |
|  |  | Ornamental | Whole plant | Planted in public and private gardens |
|  |  | Construction | Peduncle (dry) | Livestock keeper |
|  |  | Living fences | Whole plant | Planted in private gardens |
| *Agave* aff. *scabra* Ortega, N, EE25251c | Maguey, bronco | Food (quiote) | Peduncle | Cooked in a well, with hot stones and firewood, covered for 24 hours |
|  |  | Fibers | Leaves | Used to make ties |
|  |  | Living fences | Whole plant | Planted in private gardens |
|  |  | Living fences | Whole plant | Planted in private gardens |
| *Asparagus setaceus* Kunth, E, EE25332 | Hoja elegante | Ornamental | Whole plant | Planted in private gardens |
| *Dasylirion berlandieri* S. Watson, N, EE25253 | Sotol | Food | Root | Boiled and fermented (to prepare alcoholic beverages) |
|  |  | Rites and religion | Leaves (base) | With the base of the leaves, structures similar to flowers are made that adorn the main square and streets in the celebration of the patronal feast of San Pedro |
| *Polianthes tuberosa* L., N, EE25254 | Nardo | Ornamental | Whole plant | Planted in private gardens |
| *Sansevieria trifasciata* Prin., E, EE25498 | Lengua de suegra | Ornamental | Whole plant | Planted in private and public gardens |
| *Yucca filifera* Chabaud, N, EE25155 | Palma china | Food | Flowers (called chochas) | Raw, collected before opening and the reproductive structures are removed so that when cooking they do not make the food bitter |
|  |  | Food | Fuits (called dátiles) | Raw |
| *Yucca filifera* Chabaud, N, EE25155 | Palma china | Food | Fruit | Raw |
|  |  | Ornamental | Whole plant | Raw |
| *Yucca treculean*a Carrière, N, EE25155b | Palma samandoca | Food | Flowers (called chochas) | Raw, collected before opening and the reproductive structures are removed so that when cooking they do not make the food bitter |
|  |  | Live fences | Whole plant | Planted in private gardens |
| **ASPHODELACEAE** |  |  |  |  |
| *Kalanchoe blosfeldiana* Poelln., E, EE25152 | Brujita | Ornamental, for its beautiful fleshy leaves | Whole plant | Planted in private gardens |
| *Kalanchoe digremontiana* Raym.-Hamet & H. Perrier, E, EE25333 | Urania | Medicinal (endocrin system), anti inflamatory | Sap | Raw, drink the sap |
|  |  | Medicinal (gastric system), heal gastrointetinal problems | Leaves (pulp) | Raw, milled, drink the sap |
|  |  | Ornamental | Whole plant | Planted in private gardens |
| **ASTERACEAE** |  |  |  |  |
| *Artemisia ludoviciana* Nutt., N, EE25256, EE25334 | Estafiate | Medicinal (gastrointestinal system), diarrhea, flatulences | Leaves and stems | Boiled, drink infusion |
| *Baccharis salicifolia* Nutt, N, EE25258 | Jara, jarilla | Medicinal (gastro-intestinal system), diarrhea, flatulences | Leaves and stems | Cut into pieces, boil inwater, drink the solution |
| *Calea oliveri* B.L.Rob. & Greenm., N, EE25368 | Ámbula | Medicinal (nervous system), insomnia | Leaves | Boiled in water, drink the solution |
| *Chrysactinia mexicana* A. Gray, N, EE25370 | Hierba de San Nicolás | Medicinal (Reproductive system), aphrodisiac | Leaves | Boiled in water, drink the solution |
| *Chrysanthemum morifolium* Ramat., EE25222 | Crisantemo | Ornamental | Whole plant | Planted in private gardens |
| *Conyza filaginoides* (DC.) Hieron, N, EE25497 | Simonillo | Ornamental | Whole plant | Planted in private gardens |
|  |  | Medicinal (gastro-intestinal system), diarrhea, colic | Leaves and stems | Boiled in water,drink the solution |
|  |  | Medicinal (endocrin system), diabetes and cancer | Leaves and stems | Boiled in water,drink the solution |
| *Dahlia coccinea* Cav., N, EE25388 | Dalia (the representative plant of Mexico) | Ornamental,by its showy and big inflorescences with red external flowers | Whole plant | Planted in private gardens |
| *Flourensia cernua* DC., N, EE25387 | Hojasé | Medicinal (gastro-intestinal system), constipation | Leaves | Boil only 3-4 leaves, very astringent effect and very bitter taste |
| *Gnaphalium viscosum* Kunth, N, EE25389 | Gordolobo | Medicinal (respiratory system), cough, throat pain | Stems, leaves, inflorescences and flowers | Boiled in water, drink the solution |
| *Grindelia inuloides* Willd. var. *inuloides*, N, EE25390 | Árnica | Medicinal (Skeletal-muscular system), external wounds | Leaves and inflorescences, boiled, the solution use as | Boiled in hot wtaer, drink the solution |
| *Gutierrezia sarothrae* (Pursh) Britton & Rusby, N, EE25496 | Amargosa | Medicinal (broken bones), | Leaves | Used as plaster (glutinous stems, sticky) |
| *Gymnopserma glutinosum* Less., N, EE25369 | Marica | Fibers | Branches | Dry, they |
|  |  | Household items | Leaves and stems | Dried, intertwine and tie and attach to a stick to make homemade brooms |
| *Helianthus annuus* L., N, EE24495 | Girasol | Forage | Whole plant | Raw |
| *Lactuca sativa* L., E, EE25391 | Lechuga | Food | Leaves | Raw, previosly disinfected with chlorine |
| *Machaeranthera tanacetifolia* (Kunth) Nees, N, EE25494 | Árnica | Medicinal | Leaves and inflorescences | Boiled, the solution used as cataplasm |
| *Matricaria recutita* L., E, EE25493 | Manzanilla | Medicinal (gastro-intestinal system), colic, stomach ache | Leaves | Boiled, drink the solution |
| *Parthenium hysterophorus* L., N, EE25492 | Amargoso | Mosquito repellent | Whole plant (dry) | Burning in the yard, the smoke produced repels insects and other pests |
|  |  | Household items | Leaves and stems | Dried, intertwine and tie and attach to a stick to make homemade brooms |
| *Tagetes lucida* (Sweet) Voss, N, EE25491 | Yerbanís | Beverage | Leaves, stems, inflorescens, and flowers | Boiled, drink as tea |
|  |  | Medicinal (gastro-intestinal system), stomach ache, colic, ulcer | Leaves, stems, inflorescens, and flowers | Boiled, drink as tea |
| *Tanacetum parthenium* (L.) Sch.Bip., E, EE25490 | Altamisa | Mosquito repellent | Whole plant | Alive, inside the house |
|  |  | Medicinal (gastric system), stomach ache | Leaves and stems | Boiled, drink the solution |
| *Taraxacum officinale* (L.) Weber ex F. H.Wigg., E, EE25489 | Diente de león | Food | Leaves | Raw (previously disinfected with chlorine |
|  |  | Forage | Whole plant | Raw |
| *Trixis californica* Kellogg, N, EE25488 | Árnica | Medicinal | Leaves and stems | Boiled, drink the solution |
| *Zinnia elegans* L., N, EE25335 | Cartulina | Ornamental | Whole plant | Planted in private and public gardens |
| **BALSAMINACEAE** |  |  |  |  |
| *Impatiens hawkeri* W. Bull, E, EE25219 | Belén | Ornamental | Whole plant | Planted in private gardens |
| **BEGONIACEAE** |  |  |  |  |
| *Begonia gracilis* Kunth, N, EE25236 | Begonia | Ornamental | Whole plant | Planted in private gardens |
| **BIGNONIACEAE** |  |  |  |  |
| *Chilopsis linearis* (Cav.) Sweet, N, EE25487 |  | Ornamental, by its beautiful flowers | Whole plant | Planted in private and public gardens |
| *Tecoma stans* (L.) Juss. ex Kunth, N, EE25218 | Tronadora, San Pedro | Ornamental | Whole plant | Planted in public and private gardens |
| **BORAGINACEAE** |  |  |  |  |
| *Cordia boisssieri* A. DC., N, EE25157 | Anacahuita | Medicinal (Respiratory system), pneumonia | Flowers and fruit (pulp) | Boiled, drink the infusion |
|  |  | Ornamental | Whole plant | Planted in public and private gardens |
|  |  | Forage | Fruits | Raw |
| *Ehretia anacua* (Terán & Berland.) I. M. Johnst., N, EE25163 | Anacua | Ornamental | Whole plant | Planted in public and private gardens |
| **BRASSICACEAE** |  |  |  |  |
| *Brassica oleracea* L., E, EE25486 | Repollo | Food | Leaves | Raw or cooked with other vegetables. |
| *Lepidium peruvianum* G. Chacón, E, EE25336 | Raíz peruana | Medicinal (gastrointestinal, endocrin, and urinary systems) | Root | Boiled, drink the infusion |
| *Rorippa officinale* R. Br., E, EE25485 | Berro | Medicinal (endocrin system), protstate problems | Leaves and stems | Boiled, eat and drink infusion |
|  |  | Food | Leaves | Raw (previusly disinfected with chlorine in water) or cooked with other vegetables |
| *Raphanus sativus* L., E, EE25484 | Rábano | Food | Root | Raw, in salads |
|  |  | Medicinal (respiratory system), asthma problems | Root | Raw, pulp |
|  |  | Medicinal (Blood system), lower blood pressure | Root | Raw, pulp |
| **BROMELIACEAE** |  |  |  |  |
| *Ananas comosus* (L.) Merr., E, EE25483 | Piña | Food | Fruit | Raw |
|  |  | Food | Fruit juice | Meat tenderizer |
| *Hechtia podantha* Mez, N, EE25392 | Guapilla | Fibers | Leaves | Leaves are divided into multiple fibers used to make woven products (ties) |
| *Tillandsia usneoides* (L.) L., N, EE25231 | Paixtle | Rites and religion | Leaves | Dry, decorate the christmas tree |
|  |  | Manufacture of articles | Leaves | To make pillows |
| **BUDDLEJACEAE** |  |  |  |  |
| *Buddleja cordata* ssp. *tomentella* (Standl.) E.M.Norman, N, EE25393 | Tepozán | Medicinal (skeletal-muscular system), general pain | Leaves | Boiled in water, the solution used as cataplasm |
| **CACTACEAE** |  |  |  |  |
| *Cylindropuntia imbricata* (Haw.) F.M.Knuth, N, EE25246 | Coyonoxtle | Medicinal (skeletal-muscular system), breaks, breaks and fissures of bones | Stems pulp | Raw, use as cataplasm, smear the pulp on the injured area and bandage |
| *Cylindropuntia leptocaulis* (DC.) F.M.Knuth, N, EE25246b | Tasajillo | Medicinal (endocrin system) cancer | Stems pulp | Boiled, drink the infusion |
| *Echinocactus platyacanthus* Link & Otto, N, EE25482 | Biznaga burra | Food | Stem pulp | Cooked with piloncillo (brown sugar) to make candies |
| *Hylocereus undatus* (Haw.) Britton & Rose, N, EE25377 | Pithaya | Food | Fruit | Raw, blended with water to make drinks |
|  |  | Ornamental | Whole plant | Planted in private gardens |
|  |  | Dye | Fruit | Raw, squeezed |
| *Lophophora williamsii* (Lem. ex Salm-Dyck) J.M. Coult., N, EE25394 | Peyote | Spiritual-religious | Whole plant | Raw, eaten in pieces or blended in water and drink the potion |
|  |  | Medicinal (Skeletal-muscular system) | Whole plant or cut into pieces inside alcohol and mixed with marijuana (Cananbis sativa), | Raw, cataplasm, rubbing on sore joints |
|  |  | Medicinal (nervous system), insomnia | Pieces of plant | Raw, eaten in pieces or blended in water and drink the potion |
| *Mammillaria heyderi* Muehlenpf., N, EE25395 | Chilitos | Ornamental | Whole plant | Planted in private gardens |
| *Myrtillocactus geometrizans* (Mart. ex Pfeiff.) Console, N, EE25396 | Garambuyo | Living fences | Whole plant | Planted in private gardens |
|  |  | Ornamental | Whole plant | Planted in private gardens |
| *Opuntia ficus-indica* (L.) Mill., N, EE25397 | Nopal sin espina | Ornamental | Whole plant | Planted in private gardens |
|  |  | Forage | Stems (cladodes) | Raw, cut into pieces and scorched (to remove thorns) |
|  |  | Food | Stems (cladodes) and fruits | Peeled and cut into pieces, raw or cooked; fruit eaten raw |
|  |  | Medicinal (endocrin system), low cholesterol | Stems | Raw, cut into pieces and eat |
| *Opuntia lindheimeri* Engelm., N, EE25249 | Nopal | Forage | Stems (cladodes) and fruits | Raw, cut into pieces and scorched (to remove thorns); fruits eaten raw |
|  |  | Food | Stems | Raw |
|  |  | Medicinal (endocrin system), low cholesterol | Stems | Raw, stem pulp |
|  |  | Medicinal (gastrointestinal system), improve digestion | Stems | Raw, stem pulp, liquefied |
| **CANNABACEAE** |  |  |  |  |
| *Celtis leavigata* Willd., N, EE25233b | Palo blanco | Ornamental | Whole plant | Planted in private gardens |
| *Celtis pallida* Torr., N, EE25233 | Granjeno | Food | Fruits | Raw or boiled to mkae syrup |
|  |  | Ornamental | Whole plant | Planted in private gardens |
| **CANNABINACEAE** |  |  |  |  |
| *Cannabis sativa* L., E, EE25481 | Mariguana | Medicinal (Skeletal-muscular system) | Female inflorescences and leaves into alcohol and mixed with peyote | Cataplasm, rubbing on sore joints |
|  |  | Recreational playful use | Female inflorescences | Smoked |
| **CANNACEAE** |  |  |  |  |
| *Canna indica* L., E, EE25240 | Coyol | Ornamental, for its beautiful flowers | Whole plant | Planted in private gardens |
| **CAPRIFOLIACEAE** |  |  |  |  |
| *Lonicera japonica* Thunb., E, EE26167 | Madreselva | Ornamental, for the delicious aroma of its flowers | Whole plant | Planted in private gardens |
| **CARICACEAE** |  |  |  |  |
| *Carica papaya* L., N, EE25480 | Papaya | Food | Fruit | Raw, or in fruit salads |
| **CARYOPHYLLACEAE** |  |  |  |  |
| *Dianthus caryophyllus* L., E, EE25224 | Clavel | Ornamental, for its beautiful flowers | Whole plant | Planted in private gardens |
| *Dianthus deltoides* L., E, EE25440 | Clavelina | Ornamental, for its beautiful flowers | Whole plant | Planted in private gardens |
| *Gypsophila paniculata* L., E, EE25441 | Ilusión | Ornamental, for its beautiful flowers | Whole plant | Planted in private gardens |
| **COMMELINACEAE** |  |  |  |  |
| *Commelina coelestis* Willd., N, EE25442 | Hierba del pollo | Ornamental, for its beautiful flowers | Whole plant | Planted in private gardens |
| **COSTACEAE** |  |  |  |  |
| *Costus igneus* N. E. Br., E, EE25443 | Insulina | Medicinal (endocrin system), diabetes | Leaves | Boiled, drink the infusion |
| **CONVOLVULACEAE** |  |  |  |  |
| *Ipomoea batatas* (L.) Lam., N, EE25444 | Camote | Food | Root | Rosted or boiled |
| *Ipomoea purpurea* (L.) Roth, N, EE25445 | Manto de la virgen | Ornamental, for its beautiful purple flowers | Whole plant | Planted in private gardens |
| **CRASSULACEAE** |  |  |  |  |
| *Echeveria simulans* Rose, N, EE25446 | Siempreviva | Ornamental, for its beautiful fleshy leaves | Whole plant | Planted in private gardens |
|  |  | Medicinal (ophtlmic system), red eyes, irritated eyes | Sap | Eye drops |
| *Sedum diffusum* S. Watson, N, EE25437 | Chismes | Ornamental, for its beautiful fleshy leaves | Whole plant | Planted in private gardens |
|  |  | Medicinal (ophtlmic system), red eyes, irritated eyes | Sap | Eye drops |
| *Sedum palmeri* S. Watson, N, EE25438 | Deditos | Ornamental, for its beautiful fleshy leaves | Whole plant | Planted in private gardens |
| **CUCURBITACEAE** |  |  |  |  |
| *Citrullus lanatus* (Thunb.) Matsum. & Nakai, E, EE25151 | Sandía | Food | Fruit | Raw, cut into pieces |
|  |  | Forage (pigs) | Fruit peel | Raw |
| *Cucumis anguria* L., E, EE25364 | Pepinillo | Food | Fruit | Boiled, into brine |
|  |  | Forage | Fruit | Raw |
| *Cucumis melo* L., E, EE25365 | Melón | Food | Fruit | Raw, cut into pieces |
|  |  | Forage (pigs) | Fruit peel | Raw |
| *Cucurbita ficifolia* Bouché, E, EE25366 | Chilacayote | Food | Fruit | Boiled in water with sugar to make candies |
|  |  | Forage | Fruit | Raw |
|  |  | Food | Fruit | Cooked with other vegetables |
| *Cucurbita moschata* Duchesne, N, EE25367 | Calabaza | Food | Fruit | Cooked or boiled in water with sugar to make candies |
|  |  | Forage | Leaves | Raw |
| *Cucurbita pepo* L., N, EE25439 | Calabaza | Food | Fruit | Cooked |
|  |  | Food | Seeds | Raw, dried, toasted and salty |
|  |  | Forage | Leaves and fruits | Raw |
| *Luffa aegyptiaca* Mill., E, EE25435 | Estropajo | Fibers | Inner part of dried fruit | To wash dishes or to carve skin for bathing |
| *Sechium edule* (Jacq.) Sw., N, EE25479 | Chayote | Food | Fruit | Raw, cut into pieces or boiled |
| **CUPRESSACEAE** |  |  |  |  |
| *Cupressus arizonica* Greene, N, EE25153 | Cedro | Ornamental | Whole plant | Planted in public and private gardens |
|  |  | Fuel | Wood | Dry |
|  |  | Furniture | Wood | Dry |
|  |  | Rites-religion | Sap (resin) | Used as incense during religious prayers |
|  |  | Construction | Wood | Dry, to make columns and beams of houses |
| *Cupressus lousitanica* Mill., E, EE25153a | Ciprés | Ornamental | Whole plant | Planted in public and private gardens |
|  |  | Furniture | Wood | Dry |
|  |  | Fuel | Wood | Dry |
|  |  | Construction | Wood | Dry, to make columns and beams of houses |
| *Cupressus sempervirens* L., E, EE25378 | Pincel | Ornamental | Whole plant | Planted in public and private gardens |
|  |  | Fuel | Wood | Dry |
|  |  |  | Construction | Wood, Dry, to make columns and beams of houses |
| *Juniperus flaccida* Schltdl., N, EE25436 | Táscate | Ornamental | Whole plant | Planted in public and private gardens |
|  |  | Fuel | Wood | Dry |
|  |  | Construction | Wood | Dry, to make columns and beams of houses |
| *Thuja occidentalis* L., E, EE25172 | Tuya | Ornamental | Whole plant | Planted in public and private gardens |
| **CYCADACEAE** |  |  |  |  |
| *Cycas revoluta* Thunb., N, EE25434 | Chamal, cica | Ornamental | Whole plant | Planted in public and private gardens |
| *Dioon edule* Lindl., N, EE25375 | Chamal | Ornamental | Whole plant | Planted in public and private gardens |
|  |  | Food | Seeds | To make flour and tortillas |
| **EBENACEAE** |  |  |  |  |
| *Diospyros palmeri* Eastw., N, EE25432 | Chapote | Ornamental | Whole plant | Planted in public and private gardens |
|  |  | Forage | Fruits | Raw, for cattle, sheeps, goats and pigs |
|  |  | Fuel | Trunks and branches | Dry |
|  |  | Construction | Wood | Dry, to make columns and beams of houses |
| **EQUISETACEAE** |  |  |  |  |
| *Equisetum laevigatum* A. Braun, N, EE25433 | Cola de caballo | Medicinal (urinary system), kidney pain | Stems | Boiled, drink the infusion |
| **EUPHORBIACEAE** |  |  |  |  |
| *Acalypha hederacea* Torr., N, EE25173 | Hierba del cáncer | Medicinal (endcorin system), cancer | Leaves and stems | Boiled, drink the solution |
|  |  | Forage | Whole plant | Raw |
| *Croton suaveolens* Torr., N, EE25478 | Salvia | Medicinal (blood system), anemia | Leaves and stems | Boiled in water, drink the infusion |
| *Euphorbia pulcherrima* Willd. ex Klotzsch, N, EE25156 | Noche buena | Ornamental | Whole plant | Planted in public and private gardens |
| *Euphorbia dentata* Michx., N, EE25261 | Golondrina | Medicinal (Respiratory system), sinusitis | Leaves and stems | Boil in water, e infusion used a nasal drops |
| *Euphoria milii* Des Moul., E, EE25261b | Corona de Cristo | Ornamental | Whole plant | Planted in public and private gardens |
| *Jatropha dioica* Sessé, N, EE25431 | Sangre de Drago | Medicinal (dermatologic system), hair growth, fungi |  | Milled, the pulp used as shampoo |
|  |  | Medicinal (gastric system), harden the gums | Leaves and stems | Milled, chew and spit out the pulp |
| *Ricinus communis* L., E, EE25159 | Higuerilla | Ornamental | Whole plant | Planted in public and private gardens |
| *Sapium sebiferum* (L.) Roxb., E, EE25164 | Sapium | Ornamental | Whole plant | Planted in public and private gardens |
| *Tragia ramosa* Torr., N, EE25363 | Mala mujer | Medicinal (urinary system), kidney diseases | Leaves | Boiled, drink the infusion |
| **FABACEAE** |  |  |  |  |
| *Arachis hypogaea* L., E, EE25429 | Cacahuate | Food | Seeds | Raw |
|  |  | Forage | Leaves | Raw |
| *Bauhinia purpurea* L., N, EE25225 | Pata de vaca | Ornamental | Whole plant | Planted in public and private gardens |
|  |  | Medicinal (gastrointestinal system) | Leaves | Boiled, drink the infusion |
| *Calliandra conferta* A.Gray, N, EE25430 | Charrasquillo | Forage | Leaves and fruits | Raw |
| *Cercis canadensis* L., N, EE25165 | Duraznillo | Ornamental | Whole plant | Planted in public and private gardens |
| *Cicer arietinum* L., E, EE25379 | Garbanzo | Food | Seeds | Cooked |
| *Erythrostemon mexicanus* (A. Gray) Gagnon & G. P. Lewis, N, EE25229 | Potro | Ornamental | Whole plant | Planted in public and private gardens |
| *Eysenhardtia texana* Scheele, N, 25477 | Palo azul | Ornamental | Whole plant | Planted in public and private gardens |
| *Lens culinaris* Medik, E, EE25428 | Lenteja | Food | Seeds | Cooked |
| *Pachyrhizus erosus* (L.) Urb., N, EE25476 | Jícama |  |  |  |
| *Phaseolus vulgaris* L., N, EE25475 | Frijol | Food | Seeds | Cooked |
| *Pisum sativum* L., E, EE25474 | Chícharo | Food | Seeds | Cooked |
| *Prosopis glandulosa* var. *torreyana* (L.D.Benson) M.C.Johnst., N, EE25473 | Mezquite | Construction | Tunks and branches | Dry, to make columns and beams of houses |
|  |  | Fuel | Tunks and branches | Charcoal |
|  |  | Forage | Leaves and fruits | Raw |
| *Vachellia farnesiana* (L.) Wight & Arn., N, EE25234 | Huizache | Construction | Tunks and branches | Dry |
|  |  | Fuel | Tunks and branches | Charcoal |
|  |  | Forage | Leaves and fruits | Raw |
| *Vicia faba* L., E, EE25238 | Haba | Food | Seeds | Cooked |
| **FAGACEAE** |  |  |  |  |
| *Quercus virginiana* Mill., N, EE25166 | Encino | Construction | Wood | Dry, to manufacture furniture and household goods |
|  |  | Forage | Seeds (called bellotas) | Raw |
|  |  | Fuel | Wood | Dry, cut into pieces |
|  |  | Ornamental | Whole plant | Planted in public and private gardens |
| *Quercus canbyi* Trel., N, EE25427 | Encino | Ornamental | Whole plant | Planted in public and private gardens |
|  |  | Construction | Wood | Dry, to manufacture furniture, household goods, and columns and beams of houses |
|  |  | Forage | Seeds (called bellotas) | Raw |
|  |  | Fuel | Wood | Dry, cut into pieces |
|  |  | Construction | Wood | Dry, to manufacture furniture, household goods, and columns and beams of houses |
|  |  | Ornamental | Whole plant | Planted in public and private gardens |
| *Quercus polymorpha* Schltdl. & Cham., N, EE25426 | Encino | Ornamental | Whole plant | Planted in public and private gardens |
|  |  | Forage | Seeds (called bellotas) | Raw |
|  |  | Fuel | Wood | Dry, cut into pieces |
|  |  | Construction | Wood | To manufacture furniture and household goods |
| **FOUQUERACEAE** |  |  |  |  |
| *Fouquieria spelendens* Engelm., N, EE25380 | Ocotillo, albarda | Living fences | Stems | Stems are cut and planted in rows, eventually producing root and leaves (living fences) |
|  |  | Ornamental | Whole plant | Planted in private gardens |
| **GERANIACEAE** |  |  |  |  |
| *Pelargonium hortorum* L.H. Bailey, E, EE25227 | Geranio | Ornamental | Whole plant | Planted in private gardens |
| **GESNERIACEAE** |  |  |  |  |
| *Tulipa gesneriana* L., E, EE25472 | Tulipán | Ornamental | Whole plant | Planted in private gardens |
| **HYDRANGEECEAE** |  |  |  |  |
| *Hydrangea macrophylla* (Thunb.) Ser., E, EE25471 | Hortensia | Ornamental | Whole plant | Planted in private gardens |
| **JUGLANDACEAE** |  |  |  |  |
| *Carya illinionensis* (Wangenh.) K. Koch, N, EE25168 | Nogal | Forage | Leaves | Raw |
|  |  | Food | Fruit | Raw |
|  |  | Construction | Wood | Dry |
|  |  | Fuel | Wood | Dry |
|  |  | Ornamental | Whole plant | Planted in public and private gardens |
|  |  | Medicinal (endocrin system), diabetes | Fruit | Raw |
|  |  | Medicinal (dermic system), hair dye | Bark | Boiled in water, wash hair with solution |
| *Carya myristiciformis* (F. Michx.) Nutt. ex Elliott, N, EE25470 | Nogal | Ornamental | Whole plant | Planted in public and private gardens |
|  |  | Medicinal (dermic system), hair dye | Bark | Boiled in water, wash hair with solution |
| *Juglans major* (Torr.) A. Heller, N, EE25469 | Nogal de nuez encarcelada | Forage | Leaves | Raw |
|  |  | Food | Fruit | Raw |
|  |  | Construction | Wood | Dry |
|  |  | Fuel | Wood | Dry |
|  |  | Ornamental | Whole plant | Planted in public and private gardens |
|  |  | Medicinal (dermic system), hair dye | Bark | Boiled in water, wash hair with solution |
|  |  | Medicinal (gastrointestinal system), colics | Leaves | Boiled in water |
| **LAMIACEAE** |  |  |  |  |
| *Hedeoma drummondii* Benth., N, EE25468 | Poleo | Medicinal (Nervous system), to fall asleep | Whole plant | Boiled, drink the infusion |
| *Lavandula angustifolia* Mill., E | Lavanda | Ornamental | Whole plant | Planted in public and private gardens |
| *Marrubium vulgare* L., E, EE25424 | Marrubio | Medicinal (gastro-intestinal system) | Leaves | Boiled, drink the solution |
|  |  | Medicinal (respiratory system), cough | Leaves and stems | Boiled, drink the infusion, chew and swallow leaves and stems |
| *Melissa officinalis* L., E, EE25425 | Toronjil | Ornamental, for its delicious aroma and to repel mosquitoes | Whole plant | Planted in private gardens |
|  |  | Medicinal (gastro-intestinal system), colics | Leaves and stems | Boiled, drink the infusion |
|  |  | Medicinal (respiratory system), cough | Leaves and stems | Boiled, drink the infusion |
| *Mentha piperita* L., E, EE25241 | Yerbabuena | Medicinal (respiratory system), cough | Leaves and stems | Boiled, drink the infusion, chew and swallow leaves and stems |
|  |  | Medicinal (respiratory system), fever and cold | Leaves and stems | Boiled, drink the infusion |
| *Mentha spicata* L., E, EE25241b | Yerbabuena | Medicinal (gastro-intestinal system), spasms | Leaves and stems | Boiled, drink the infusion |
|  |  | Medicinal (respiratory system), flu and asthma | Leaves | Boiled, drink the infusion |
| *Monarda citriodora* var. *austromontana* (Epling) B.L.Turner, N, EE25381 | Poleo cabezón, betónica | Medicinal (respiratory system), cough | Leaves and stems | Boiled, drink the infusion, chew and swallow leaves and stems |
|  |  | Medicinal (Nervous system), to fall asleep | Leaves | Dry, put a piece of branch under the pillow at night |
|  |  | Ornamental, for its delicious aroma and beautiful flowers | Whole plant | Planted in private gardens |
| *Ocimum basilicum* L., E, EE25242 | Albahaca | Medicinal (Nervous system), used agians insomnia, to fall asleep | Leaves and stems | Boiled, drink the infusion |
|  |  | Religious rites | Whole plant | Part of the flower bouquets used in pilgrimages |
| *Origanum majorana* L., E, EE25257 | Orégano | Food (condiment) | Leaves | Dry, added to broths and soups |
|  |  | Medicinal (respiratory system), cough and cold | Leaves and stems | Boiled, drink the infusion |
| *Plectranthus coleoides* Benth., E, EE25362 | Vaporú | Medicinal (respiratory system), cough | Leaves and stems | Milled, mixed with glycerine and spread on the chest and nostrils |
|  |  | Religious rites | Whole plant | Dry, milled, used as incense |
|  |  | Ornamental, by its delicious aroma and beautiful flowers | Whole plant | Planted in private gardens |
| *Poliomintha longiflora* A.Gray, N, EE25259 | Orégano de montaña | Food (condiment) | Leaves and stems | Dry, added to broths and soups |
|  |  | Medicinal (respiratory system), cough, throat pain | Leaves and stems | Boiled, drink the infusion |
|  |  | Ornamental, by its beautiful flowers and aroma | Whole plant | Planted in private gardens |
| *Rosmarinus officinalis* L., E, EE25382 | Romero | Medicinal (gastro-intestinal system) colics | Leaves | Boiled, drink the infusion |
|  |  | Medicinal (respiratory system), nasal congetion | Stems, leaves and flowers | Cut into pieces, boiled, drink the infusion |
|  |  | Ornamental, by its beautiful flowers and aroma | Whole plant | Planted in private gardens |
|  |  | Condiment | Leaves | Dry, added to flavor the food |
| *Scutellaria* sp., N, EE25422 | Mirto | Ornamental, by its beautiful flowers and aroma | Whole plant | Planted in private gardens |
| *Teucrium cubense* L., N, EE25423 | Verneba | Medicinal (fever) | Leaves and stems | Boiled, drink the solution |
| *Thymus vulgaris* L., E, EE25360 | Tomillo | Medicinal (respiratory system), cough and expectorant | Leaves and stems | Boiled, drink the infusion |
|  |  | Medicinal (dermic system), dermic infections | Leaves | Boilded, use as cataplasm |
|  |  | Food (condiment) | Leaves and stems | Dry, add to stews, soups and broths |
| **LAURACEAE** |  |  |  |  |
| *Cinnamomum verum* J.Presl., E, EE25361 | Canela | Medicinal (gastro-intestinal system), stomach pain, vomit | Bark | Boiled, drink the infusion |
|  |  | Medicinal (respiratory system), cough and throat pain | Bark | Boiled, drink the infusion |
|  |  | Medicinal (endocrinal system), diabetes | Bark | Boiled, drink the infusion |
|  |  | Medicinal (blood system), improve blood circulation | Bark | Boiled, drink the infusion |
| *Litsea glauscecens* Kunth, N, EE25359 | Laurel | Food (condiment) | Leaves | Dry, add to stews, soups and broths |
|  |  | Ornamental, by its showy green stems | Whole plant | Planted in private gardens |
| *Persea americana* Mill., N, EE25170 | Aguacate | Food | Fruit | Raw, used in multiple ways |
|  |  | Medicinal (respiratory system), asthma | Leaves | Boiled, drink the infusion |
|  |  | Medicinal (circulatory system), arterial hypertension | Leaves | Boiled, drink the infusion |
| *Persea podadenia* S. F. Blake, N | Salsafrás | Medicinal (circualtory system), anemia | Bark | Cut into pices, boiled, drink the infusion |
| **LILIACEAE** |  |  |  |  |
| *Allium cepa* L., E, EE25358 | Cebolla | Food | Stem | Raw or boiled |
|  |  | Medicinal (respiratory system), cough, asthma, flu | Stem | Boiled, drink the infusion along with honey bee |
|  |  | Medicinal (circulatory system), improve blood circulation | Stems | Boiled, drink the infusion |
| *Allium sativum* L., E, EE25421 | Ajo | Medicinal (circulatory system), low cholesterol, improve circulation | Stems | Boiled, drink the infusion, raw cutt into pieces, milled |
|  |  | Medicinal (dermic system), dermic wounds | Cloves | Ground garlic cloves, the pulp is smeared on the wound |
|  |  | Medicinal (auditive system), earache | Cloves | Milled, pulp is semeared inside the ears |
|  |  | Food (condiment) | Bulb (clove) | Raw or boiled, added to mutiple foods |
|  |  | Religious-rites | Complete bulb | Dry, several bulbs are braided and hung at the entrance of the houses to ward off bad vibes |
| *Allium* sp., N, EE25467 | Cebollín | Medicinal (auditive system) | Bulb | Raw, milled, the pulp is meared inside the ears |
| *Lilium candidum* L., E, EE25466 | Lirio | Ornamental, by its beautiful flowers | Whole plant | Planted in private gardens |
| **LOMARIOPSIDACEAE** |  |  |  |  |
| *Nephrolepis exaltata* (L.) Schott, N, EE25465 | Helecho | Ornamental, by its beautiful perennial foliage | Whole plant | Planted in pots in private gardens |
| **LHYTRACEAE** |  |  |  |  |
| *Heimia salicifolia* (Kunth) Link, N, EE25169 | Jarilla | Medicinal (dermic system), dermatitis | Leaves | Milled, boiled in water, use as cataplam |
| *Lagerstroemia indica* L., E, EE25244 | Crespón | Ornamental, by its beautiful perennial foliage anf showy flowers | Whole plant | Planted in pots in public and private gardens |
| *Punica granatum* L., E, EE25154 | Granada | Ornamental | Whole plant | Planted in private gardens |
|  |  | Medicinal (gastro-intestinal system), diarrea | Peel | Boiled in water, drink the solution |
|  |  | Food | Fruit | Raw |
| **MAGNOLIACEAE** |  |  |  |  |
| *Magnolia grandiflora* L., N, EE25171 | Magnolia | Ornamental, by its perennial folage and beautiful white flowers | Whole plant | Planted in public and private gardens |
| **MALVACEAE** |  |  |  |  |
| *Alcea rosea* L., E, EE25357 | Malva rosa | Ornamental, by its big and beautiful flowers | Whole plant | Planted in private gardens |
| *Hibiscus denudatus* Benth., N, EE25174 | Hibisco | Ornamental, by its beautiful flowers | Whole plant | Planted in private gardens |
| *Hibiscus syriacus* L., E, EE25417 | Malva | Ornamental, by its beautiful flowers | Whole plant | Planted in private gardens |
| *Malva parviflora* L., N, EE25418 | Malva de patio | Medicinal (circulatory system), varicose veins | Fruits and leaves | Boiled, drink the solution and chew and swallow the ground fruits and leaves |
| *Tilia mexicana* Schltdl., N, EE25419 | Tila | Medicinal (nervous system) insomnia | Dried flowers | Boiled in water, drink the solution |
|  |  | Ornamental | Whole plant | Planted in private gardens by its majestic bearing |
| *Sida rhombifolia* L., N, EE25420 | Hierba del cochino | Medicinal (gastro-intetinal system) diarrea | Immature fruits | Boiled in water, drink the infusion |
| **MELIACEAE** |  |  |  |  |
| *Azadirachta indica* A.Juss., E, EEEE25265 | Neem (Nim) | Medicinal (gastro-intestinal system), stomach pain, cramps, constipation | Bark | Boiled in water, drink solution |
|  |  | Ornamental | Whole plant | Planted in private gardens |
| *Melia azedarach* L., E, EE25266 | Canelo | Medicinal (dermic system), wound, skin irritation | Bark and leaves | Boiled, the infusion used as cataplasm in the wounded area |
|  |  | Ornamental | Whole plant | Planted in public and private gardens |
| **MORACEAE** |  |  |  |  |
| *Ficus carica* L., E, EE25268 | Higo | Food | Fruit | Raw or boiled and canned fruit |
|  |  | Ornamental | Whole plant | Planted in private gardens |
|  |  | Medicinal (endocrin system), diabetes | Fruits; leaves | Raw; leaves boiled, drink the infusion |
| *Morus celtidifolia* Kunth, N, EE25349 | Mora | Medicinal (endocrin system), diabetes | Fruits | Boiled, drink the solution |
|  |  | Ornamental | Whole plant | Planted in public and private gardens |
|  |  | Food | Fruits | Raw |
|  |  | Dye | Fruits | Raw, squeezed |
| **MORINGACEAE** |  |  |  |  |
| *Moringa oleifera* Lam., E, EE25351 | Moringa | Medicinal (endocrin system), diabetes | Leaves | Boiled, drin the infusion |
| **MUSSACEAE** |  |  |  |  |
| *Mussa* x *oleifera* Lam., E, EE25415 | Plátano | Food | Fruit | Raw |
| **MYRTACEAE** |  |  |  |  |
| *Eucalyptus camaldulensis* Dehnh., E, EE25416 | Eucalipto | Ornamental | Whole plant | Planted in private gardens |
|  |  | Medicinal (respiratory system), nasal congestion | Leaves | Boiled, drink the infusion |
|  |  | Medicinal (nervous system) stress | Leaves | Boiled, drink the infusion |
| *Psidium guajava* L., N, EE25228 | Guayaba | Medicinal (gastro-intestinal system), fever | Leaves | Boiled, drink the infusion |
|  |  | Medicinal (gastro-intestinal system), diarrea | Fruit | Raw, eat several fruits |
|  |  | Food | Fruit | Raw, and canned fruits |
|  |  | Medicinal (endocrin system), diabetes | Leaves | Boiled, drink the infusion |
| *Syzygium aromaticum* (L.) Merr. & L. M. Perry, E, EE25350 | Clavo | Food (condiment) | Floral buds (immature and dry) | Raw or bolied used in multiple ways |
|  |  | Medicinal (gastro-intestinal system), constipation | Fruits | Boiled, drink the infusion or chewed |
| **NYCTAGINACEAE** |  |  |  |  |
| *Bougainvillea spectabilis* Willd., N, EE25223 | Bugambilia | Ornamental, by its showy flowers | Whole plant | Planted in public and private gardens |
|  |  | Medicinal (respiratory system) | Bracts and flowers | Boiled in water, drink the solution |
| *Mirabilis jalapa* L., N, EE25252 | Maravilla | Ornamental, by its showy and besutiful flowers | Whole plant | Planted in private gardens |
| **OLEACEAE** |  |  |  |  |
| *Fraxinus americana* L., N, EE25255b | Fresno | Ornamental | Whole plant | Planted in public and private gardens |
|  |  | Construction | Wood | Dry, to make columns and bems of houses |
| *Fraxinus cuspidata* Torr., N, EE25255 | Fresno | Ornamental, by its beautiful flowers | Whole plant | Planted in public and private gardens |
| *Fraxinus greggi* A. Gray, N, EE25255c | Barretilla | Ornamental | Whole plant | Planted in public and private gardens |
|  |  | Construction | Wood | Dry, piles and columns for houses |
|  |  | Fuel | Wood | Dry |
| *Jasminum floridum* Bunge, E, EE25372 | Jazmín | Ornamental | Whole plant | Planted in private gardens |
| *Jasminum officinale* L., E, EE25372b | Jazmin |  |  |  |
| *Ligustrum japonicum* Thunb., E, EE25162 | Trueno | Ornamental | Whole plant | Planted in public and private gardens |
| **ONAGRACEAE** |  |  |  |  |
| *Oenothera rosea* L'Hér. ex Aiton, N, EE25413 | Hierba del golpe | Medicinal (dermic system), extenral wounds | Whole plant | Raw, milled, smear in the wounded area |
| **PAPAVERACEAE** |  |  |  |  |
| *Hunnemannia fumariifolia* Sweet, N, EE25348 | Amapola de campo | Ornamental, by its showy yellow flowers | Whole plant | Planted in private gardens |
| PINACEAE |  |  |  |  |
| *Pinus cembroides* Zucc., N, EE25353 | Piñonero | Food | Seeds | Raw |
|  |  | Fuel | Wood | Dry |
|  |  | Ornamental | Whole plant | Planted in private gardens |
| *Pinus greggii* Engelm. ex Parl., N, EE25354 | Pino | Fuel | Wood | Dry |
|  |  | Ornamental | Whole plant | Planted in private gardens |
| *Pinus pseudostrobus* Lindl., N, EE25414 | Pino blanco | Fuel | Wood | Dry |
|  |  | Ornamental | Whole plant | Planted in private gardens |
|  |  | Rites-religious | Resin | In prayer altars |
| **PIPERACEAE** |  |  |  |  |
| *Piper nigrum* L., E, EE25356 | Pimienta | Food (condiment) | Seeds | Mixed with different meals |
| **PLANTAGINACEAE** |  |  |  |  |
| *Antirrhinum majus* L., E, EE25459 | Perritos | Ornamental, by its beautiful flowers | Whole plant | Planted in private gardens |
| *Plantago lanceolata* L., N, EE25458 | Llantés | Medicinal (endocrin system), cancer | Leaves | Boiled in water, drink the infusion |
| **PLUMBAGINACEAE** |  |  |  |  |
| *Plumbago pulchella* Boiss., E, EE25158 | Júdica | Ornamental | Whole plant | Planted in private gardens |
|  |  | Medicinal (dermic system) | Stems and leaves | Boiled, use the solution as catpalsm |
| **POLYGONACEAE** |  |  |  |  |
| *Polygonum punctatum* Elliot, N, EE25407 | Chilillo | Ornamental | Whole plant | Planted in private gardens |
| **POACEAE** |  |  |  |  |
| *Arundo donax* L., E, EE25408 | Carrizo | Religious-rites | Stems | Religious ornaments |
|  |  | Construction | Stems | Roofs |
| *Avena sativa* L., E, EE25373 | Avena | Food | Seeds | Raw or boiled |
| *Bambusa* sp., E, EE25374 |  | Religious-rites | Stems | Religious ornaments |
|  |  | Construction | Stems | Roofs |
| *Bouteloua curtipendula* (Michx.) Torr., N, EE25409 | Banderita | Forage | Whole plants | Raw |
| *Cymbopogon citratus* (DC.) Stapf, E, EE25410 | Zacate limón | Ornamental | Whole plant | Planted in private gardens |
|  |  | Medicinal (gastron-intestinal system) | Stems and leaves | Boiled, drink the infusion |
| *Sorghum bicolor* (L.) Moench, E, EE25411 | Sorgo | Forage | Whole plants | Raw |
| *Sorghum halepense* (L.) Pers., E, EE25412 | Zacate Johnson | Forage | Whole plants | Raw |
| *Zea mays* L., N, EE25347 | Maíz | Food | Fruits (seeds) | Boiled or cooked with mutliple foods |
|  |  | Medicinal (gastro-intestinal system), parasites | Styles (female flowers) | Boiled in water, drink the solution |
|  |  | Medicinal (urinary system), kidney problems | Seeds | Milled, boiled, drink the solution |
| **PORTULACACEAE** |  |  |  |  |
| *Portulaca mundula* I. M. Johnston, E, 25216 | Verdolaga | Food | Leaves and stems | Raw (previously disinfected with chlorine), or cooked with different foods |
|  |  | Ornamental | Whole plant | Planted in private gardens (pots) |
| **RANUNCULACEAE** |  |  |  |  |
| *Clematis drummondii* Torr. & A.Gray, N, EE25405 | Barba de chivo | Ornamental | Whole plant | Planted in private gardens |
| **RHAMNACEAE** |  |  |  |  |
| *Colubrina greggii* S.Watson, N | Colubrina | Ornamental | Whole plant | Planted in private gardens |
| **ROSACEAE** |  |  |  |  |
| *Crataegus mexicana* Moc. & Sessé ex DC., N, 25355 | Tejocote | Medicinal (endocrin system), diabetes | Fruit | Raw or boiled, drink the fruit pulp |
|  |  | Medicinal (blood system) | Fruit | Raw or boiled, drink the fruit pulp |
| *Cydonia oblonga* Mill., E, EE25346 | Membrillo | Food | Fruit | Raw or boiled to make canned fruits |
| *Eriobotrya japonica* (Thunb.) Lindl., E, EE25406 | Níspero | Food | Fruit | Raw |
|  |  | Medicinal (endocrin and blood system), diabetes and arterial hipertension | Fruit | Raw, liquefied in water |
| *Malus domestica* Borkh., E, EE25343 | Manzana | Food | Fruit | Raw |
|  |  | Food | Canned fruits | Boiled |
|  |  | Alcoholic beverages | Fruit | Fermented |
| *Prunus armeniaca* L., E, EE25344 | Chabacano | Food | Fruit | Raw |
|  |  | Ornamental | Whole plant | Planted in private gardens |
| *Prunus domestica* L., E, EE25345 | Ciruelo | Food | Fruit | Raw |
| *Prunus persica* (L.) Batsch, E, EE25150 | Durazno | Food | Fruit | Raw |
|  |  | Ornamental | Whole plant | Planted in private gardens |
| *Purshia plicata* (D.Don) Henr., N, EE25460 | Rosa de castilla | Medicinal (gastro-intestinal system), diarrea | Leaves | Boiled, drink the solution |
| *Rosa montezumae* Humb. & Bonpl. ex Redout & Thory, N, EE25461 | Rosa | Ornamental | Whole plant | Planted in private gardens |
| **RUTACEAE** |  |  |  |  |
| *Casimiroa pringlei* (S. Wats.) Engl., N, EE25342 | Manguito | Ornamental | Whole plant | Planted in public and private gardens |
|  |  | Food | Fruit | Raw |
| *Citrus limon* (L.) Osbeck, E, EE25404 | Limón | Food | Fruit | Raw |
|  |  | Medicinal (respiratory system), cough, chest pain, throat pain | Leaves and fruit juice | Boiled, drink the solution |
|  |  | Ornamental | Whole plant | Planted private gardens |
| *Citrus sinensis* (L.) Osbeck, E, EE25341 | Naranja | Food | Fruit | Raw |
|  |  | Medicinal (respiratory system), cough, chest pain, throat pain | Leaves and fruit peel and fruit juice | Boiled, drink the solution |
|  |  | Ornamental | Whole plant | Planted in public and private gardens |
| *Helietta parvifolia* (A. Gray) Benth., N, EE25215 | Barreta | Ornamental | Whole plant | Planted in public and private gardens |
|  |  | Construction | Wood | Dry, piles and columns for houses, fences (very durable wood) |
|  |  | Ornamental | Whole plant | Planted in public and private gardens |
| *Ruta graveolens* L., E, EE25221 | Ruda | Medicinal (respiratory system), cold | Leaves and stems | Boiled |
| *Zanthoxylum fagara* (L.) Sarg., N, EE25247 | Colima | Construction | Wood | Dry, piles and columns for houses |
|  |  | Forage | Leaves | Raw |
|  |  | Medicinal (respiratory system), asthma | Leaves | Boiled, drink the solution |
|  |  | Medicinal (skeletal-muscular system), arthritis | Leaves | Boiled, drink the solution |
| **SALICACEAE** |  |  |  |  |
| *Populus mexicana* Wesm. Ex DC., N, EE25248 | Álamo, chopo | Ornamental | Whole plant | Planted in public and private gardens |
| *Salix nigra* Marshall, N, EE25462 | Sauce | Ornamental | Whole plant | Planted in public and private gardens |
|  |  | Fuel | Wood | Dry |
| **SAPINDACEAE** |  |  |  |  |
| *Koelreuteria paniculata* Laxm., E, EE25238 | Alfombrilla | Ornamental, by its showy, psrsisten fruits | Whole plant | Planted in private gardens |
| **SCROPHULARIACEAE** |  |  |  |  |
| *Leucophyllum frutescens* (Berland.) I. M. Johnst., N, EE25161 | Cenizo | Medicinal (endocrin system), hepatitis | Whole plant | Cut into the pieces, boiled, drink and take a bath with the solution |
|  |  | Ornamental | Whole plant | Planted in public and private gardens |
|  |  | Religious-rites | Branches and leaves | Part of the floral bouquets used in prayers and pilgrimages |
| **SOLANACEAE** |  |  |  |  |
| *Capsicum annum* var. *glabriusculum* (Dunal) Heiser & Pickersgill, N, EE25217 | Chile piquín, chile quipín | Food (condiment) | Fruit | Raw |
|  |  | Ornamental | Whole plant | Planted in public and private gardens |
|  |  | Medicinal (respiratory system), cough, phlegm | Fruit (milled) | Liquefied in water, drink (very spicy drink) |
| *Capsicum annum* var. *glabriusculum* (Dunal) Heiser & Pickersgill, N, EE25217b | Chile japonés | Food (condiment) | Fruit | Raw |
|  |  | Ornamental | Whole plant | Planted in public and private gardens |
| *Capsicum annum* var. *glabriusculum* (Dunal) Heiser & Pickersgill, N, EE25217c | Chile morrón | Food (condiment) | Fruit | Raw |
| *Capsicum annum* var. *glabriusculum* (Dunal) Heiser & Pickersgill, N, EE25217d | Chile jalapeño | Food (condiment) | Fruit | Raw |
| *Capsicum annum* var. *glabriusculum* (Dunal) Heiser & Pickersgill, N, EE25217e | Chile serrano | Food (condiment) | Fruit | Raw |
|  |  | Medicinal (respiratory system), cough, phlegm | Fruit (milled) | Liquefied in water, drink (very spicy drink) |
| *Datura stramonium* L., N, EE25339 | Toloache | Falling in love | Leaves and seeds | Leaves (boiled in wtaer, drink the solution), seeds (raw, chew and swallow) |
| *Lycopersicon esculentum* Mill., E, EE25403 | Tomate | Food | Fruit | Raw or cooked with other foods |
|  |  | Medicinal (skeletal-muscular system), muscular pain | Fruit | Raw, pulp, use as cataplasm |
| *Physalis philadelphica* Lam., N, EE25260 | Tomate de fresadilla | Food | Fruit | Mixed with other foods, broths, sauces and stews |
| *Solanum ovigerum* Dunal, E, EE25463 | Huevitos | Ornamental, by its fruits (egg-like) | Whole plant | Planted in private gardens |
| *Solanum tuberosum* L., E, EE25464 | Papa | Food | Root | Mixed with other foods, broths, sauces and stews |
| **TURNERACEAE** |  |  |  |  |
| *Turnera diffusa* Willd. ex Schult., N, EE25340 | Damiana, hierba del venado | Medicinal (genito-urinary system) | Leaves, stems and inflorescences | Boiled in water, drink the solution |
|  |  | Forage | Whole plant | Raw |
| **URTICACEAE** |  |  |  |  |
| *Urtica dioica* L., N, EE25402 | Hiedra | Medicinal (blood system), purify the blood | Whole plant | Boiled in water, drink the solution |
| **VERBENCEAE** |  |  |  |  |
| *Lippia graveloens* Kunth, N, EE25400 | Orégano | Food (condiment) | Leaves | Dry, added to different foods, broths and stews |
| *Verbena canescens* Kunth, N, EE25401 | Verbena | Medicinal (nervous system), insomnia | Leaves and stems | Boiled in water, drink solution, and bathe with the solution |
| **VITACEAE** |  |  |  |  |
| *Parthenocissus quinquefolia* (L.) Planch., N, EE25160 | Viña virgen | Ornamental | Whole plant | Planted in private gardens |
| *Vitis berlandieri* Planch., N, EE25338 | Parra, vid | Ornamental | Whole plant | Planted in private gardens |
|  |  | Food | Fruit | Raw |
| **XANTHORRHOEACEAE** |  |  |  |  |
| *Aloe vera* (L.) Burm.f., E, EE25250 | Sábila | Medicinal (gastro-intestinal system), gastritis | Leaves | Pulp, milled, liquefied, drink the solution |
|  |  | Medicinal (dermic system), hair restauration; dermical wounds | Leaves | Pulp, smear the pulp all over the hair; raw, smear the milled pulp in the wounded area |
|  |  | Ornamental | Whole plant | Planted in private gardens |
| **ZYGOPHYLLACEAE** |  |  |  |  |
| *Larrea tridentata* (Sessé & Moc. ex DC.) Coville, N, EE25399 | Gobernadora | Medicinal (gastro-intestinal system), spasms | Leaves | Boiled in water, drink the solution |
|  |  | Medicinal (dermic system), bad smell | Leaves | Boiled in water, wash bad smelling parts of the body |
|  |  | Smelly feet | Leaves | Dry, put leaves inside shoes |
|  |  | Cleaning the interior of car radiators | Leaves | Boiled in water, drain the hot solution into the radiator |
| **ZINGIBERACEAE** |  |  |  |  |
| *Zingiber officinale* Roscoe, E, EE25398 | Jengibre | Food (condiment) | Root | Raw, cut into the pieces |
|  |  | Medicinal (gastro-intestinal system), intestinal inflammation, fever | Root | Raw, iquefied, drink the solution |
|  |  | Medicinal (dermic system), external wounds | Root | Raw, milled, smear in the wounded areas |
