# Supplementary material for: Ethnobotany in Iturbide, Nuevo León: The Traditional Knowledge on Plants Used in the Semiarid Mountains of Northeastern Mexico
Source: Preprints.org preprint supplement (doi:10.20944/preprints202208.0414.v1), 2022-08-24
Supplement: Supplementary file 2 [file supplementary]

Archive with 12 entries (12 files):
- 1.Sustainabily_EthnobotanyIturbide_corrections15082022.docx
- 1.Sustainabily_EthnobotanyIturbide_corrections15082022.pdf
- Appendix A_EthnobotanyIturbide15082022.docx
- Appendix A_EthnobotanyIturbide15082022.pdf
- CoverLetterIturbideEthnobotany15082022.pdf
- figure 1.jpg
- figure 2.jpg
- figure 3.jpg
- Table 1.docx
- Table 2.docx
- Table 3.docx
- Table 4.docx
