# Supplementary material for: Ethnobotany in Iturbide, Nuevo León: The Traditional Knowledge on Plants Used in the Semiarid Mountains of Northeastern Mexico
Source: Preprints.org preprint supplement (doi:10.20944/preprints202208.0414.v1), 2022-08-24
Supplement: Supplementary file 2 [file supplementary › Appendix A_EthnobotanyIturbide15082022.pdf]

**Appendix A.** Families, genera, species and their uses in Iturbide, Nuevo León, Mexico. The letter after author name indicates: N = Native, E = Exotic. The collection number belongs to Eduardo Estrada (EE).

| Scientific name                                                                               | Common name      | Uses (system)                  | Part used                         | Method of use                                                        |
|-----------------------------------------------------------------------------------------------|------------------|--------------------------------|-----------------------------------|----------------------------------------------------------------------|
| ACANTHACEAE                                                                                   |                  |                                |                                   |                                                                      |
| <i>Hypoestes phyllostachya</i> Baker, E, EE25323                                              | Paleta de pintor | Ornamental                     | Whole plant                       | Planted in private gardens                                           |
| <i>Beloperone gutatta</i> Brendegee, N, EE25325                                               | Camarón          | Ornamental                     | Whole plant                       | Planted in private gardens                                           |
| ACERACEAE                                                                                     |                  |                                |                                   |                                                                      |
| <i>Acer negundo</i> L., EE25383                                                               | Maple            | Ornamental                     | Whole plant                       | Planted in public parks and private gardens                          |
| ACTINIDIACEAE                                                                                 |                  |                                |                                   |                                                                      |
| <i>Actinidia deliciosa</i> (A.Chev.) C.F.Liang & A.R.Ferguson, E, EE25447                     | Kiwi             | Food                           | Fruit (pulp)                      | Raw                                                                  |
| ADOXACEAE                                                                                     |                  |                                |                                   |                                                                      |
| Sambucus canadensis L., N, EE25384                                                            | Sauco            | Ornamental                     | Whole plant                       | Planted in public parks and private gardens                          |
|                                                                                               |                  | Medicinal (respiratory system) | Inflorescences and flowers        | Boiled, drink the infusion                                           |
| AMARANTHACEAE                                                                                 |                  |                                |                                   |                                                                      |
| <i>Amaranthus palmeri</i> S.Watson, N, EE25326                                                | Quelite          | Food                           | Leaves and inflorescences (young) | Cook with oil or raw (previously disinfected with chlorine in water) |
| <i>Beta vulgaris</i> subsp. <i>adanensis</i> (Pamukç.) Ford-Lloyd & J.T. Williams, E, EE25448 | Betabel          | Forage                         | Whole plant                       | Raw                                                                  |
|                                                                                               |                  | Food                           | Leaves                            | Boiled, liqueate                                                     |

## Continued Appendix A

| Scientific name                                                     | Common name   | Uses (system)                                                               | Part used                                       | Method of use                                          |
|---------------------------------------------------------------------|---------------|-----------------------------------------------------------------------------|-------------------------------------------------|--------------------------------------------------------|
|                                                                     |               | medicinal<br>(gastrointestinal<br>system), detoxify the gut                 | Leaves                                          | Raw, boiled or cooked                                  |
| <i>Beta vulgaris</i> L. var. <i>cicla</i> L., E, EE25371            | Acelga        | Dye                                                                         | Root                                            | Raw, squeezed                                          |
| <i>Chenopodium ambrosioides</i> L., N, EE25324                      | Epazote       | Food                                                                        | Leaves                                          | Raw, boiled or fried.                                  |
|                                                                     |               | Food                                                                        | Leaves,<br>inflorescences and<br>flowers        | Boil or cook with beans (to add flavor)                |
|                                                                     |               | Medicinal<br>(gastrointestinal<br>system), to eliminate<br>intestinal worms | Leaves, stems,<br>inflorescences and<br>flowers | Boiled, drink the solution                             |
|                                                                     |               | Condiment                                                                   | Leaves and stems                                | Dry, crushed, added to flavor the food                 |
|                                                                     |               | Forage                                                                      | Whole plant                                     | Raw                                                    |
| <i>Spinacia oleracea</i> (L.) E.H.L.Krause, E,<br>EE25449           | Espinaca      | Food                                                                        | Leaves                                          | Raw (previously disinfected with chlorine in<br>water) |
|                                                                     |               | Medicinal<br>(gastrointestinal system)                                      | Leaves                                          | Liquate, raw, to eliminate amoeba.                     |
| <b>AMARYLLIDACEAE</b>                                               |               |                                                                             |                                                 |                                                        |
| <i>Crinum asiaticum</i> L., E, 25450                                | Lirio listado | Ornamental                                                                  | Whole plant                                     | Planted in private gardens                             |
| <i>Clivia miniata</i> (Lindl.) Bosse, E, EE25451                    | Clivia        | Ornamental                                                                  | Whole plant                                     | Planted in private gardens                             |
| <b>ANACARDIACEAE</b>                                                |               |                                                                             |                                                 |                                                        |
| <i>Amphipterygium adstringens</i> (Schltdl.)<br>Standl., N, EE25452 | Cuacharalate  | Medicinal (dermic<br>system), antiseptic,<br>antibiotic                     | Bark                                            | Boiled, used as cataplasm, wound washing               |
| <i>Mangifera indica</i> L., E, EE25454                              | Mango         | Food                                                                        | Fruit                                           | Raw, and mixed with green salads                       |

## Continued Appendix A

| Scientific name                                         | Common name     | Uses (system)                                               | Part used                 | Method of use                                                      |
|---------------------------------------------------------|-----------------|-------------------------------------------------------------|---------------------------|--------------------------------------------------------------------|
| <i>Rhus trilobata</i> Nutt., N, EE25455                 | Lantrisco, jobo | Ornamental                                                  | Whole plant               | Planted in private gardens                                         |
|                                                         |                 | Ornamental                                                  | Whole plant               | Planted in private gardens                                         |
|                                                         |                 | Construction                                                | Trunks and branches       | Dry, to make columns of houses, tools and fuel                     |
| <i>Rhus virens</i> Lindh. ex A. Gray, N, EE25456        | Lantrisco       | Construction of tools and fuel                              | Trunks and branches       | Dry, to make columns of houses, tools and fuel                     |
| <i>Schinus molle</i> L., E, EE25457                     | Pirul           | Forage                                                      | Leaves                    | Raw                                                                |
|                                                         |                 | Rites (soul cleansing) and religion                         | Small branches and leaves | The leaves are rubbed all over the individual's body while praying |
|                                                         |                 | Ornamental                                                  | Whole plant               | Planted in private gardens                                         |
| ANNONACEAE                                              |                 |                                                             |                           |                                                                    |
| <i>Annona muricata</i> L., N, EE25453                   | Guanábana       | Food                                                        | Fruit                     | Raw, or liqued to make fruit drinks                                |
| APIACEAE                                                |                 |                                                             |                           |                                                                    |
| <i>Apium graveolens</i> L., E, EE25327                  | Apio            | Food                                                        | Leaves                    | Raw, in salads                                                     |
|                                                         |                 | Medicinal (blood system), low cholesterol                   | Leaves and stems          | Raw                                                                |
| <i>Coriandrum sativum</i> L., EE25328                   | Cilantro        | Food (condiment)                                            | Leaves                    | Raw or cooked in broth                                             |
| <i>Cuminum cyminum</i> L., E, EE25329                   | Comino          | Food (condiment)                                            | Seeds                     | Cooked with rice and meat                                          |
| <i>Daucus carota</i> L., E                              | Zanahoria       | Food                                                        | Root                      | Raw or cooked with different vegetables                            |
| <i>Daucus carota</i> L., E, EE25330                     | Hierba del sapo | Medicinal (urinary system), dissolve kidney stones          | Leaves and stems          | Boiled, drink the solution                                         |
| <i>Eryngium heterophyllum</i> Hemsl. & Rose, N, EE25504 | Perejil         | Medicinal (blood system), Low cholesterol and triglycerides | Root                      | Boiled, drink the solution                                         |
|                                                         |                 | Food                                                        | Leaves adn stems          | Raw or cooked with different vegetables                            |

## Continued Appendix A

| Scientific name                                                                | Common name      | Uses (system)              | Part used   | Method of use                               |
|--------------------------------------------------------------------------------|------------------|----------------------------|-------------|---------------------------------------------|
| <i>Petroselinum crispum</i> (Mill.) Fuss, E, EE25331                           |                  | Medicinal (Urinary system) | Leaves      | Prevent bladder infections                  |
|                                                                                |                  | Medicinal (blood system)   | Leaves      | Purifies the blood                          |
| APOCYNACEAE                                                                    |                  |                            |             |                                             |
| <i>Cascabela thevetia</i> (L.) Lippold, E, EE25503                             | Cascabel         | Ornamental                 | Whole plant | Planted in private gardens                  |
| <i>Plumeria rubra</i> L., N                                                    | Ramo de novia    | Ornamental                 | Whole plant | Planted in private gardens                  |
| <i>Vinca minor</i> L., E, EE25220                                              | Teresita         | Ornamental                 | Whole plant | Planted in private and public gardens       |
| ARACEAE                                                                        |                  |                            |             |                                             |
| <i>Spathiphyllum wallisii</i> Regel, N, EE25502                                | Cuna de Moisés   | Ornamental                 | Whole plant | Planted in private gardens                  |
| <i>Anthurium magnificum</i> Linden, N, EE25501                                 | Anturio, lampazo | Ornamental                 | Whole plant | Planted in private gardens                  |
| <i>Zantedeschia aethiopica</i> (L.) Spreng., E, 25500                          | Alcatraz         | Ornamental                 | Whole plant | Planted in private gardens                  |
| ARECAECACEAE                                                                   |                  |                            |             |                                             |
| <i>Brahea berlandieri</i> (Kunth) Mart., N, EE25499                            | Palmito          | Ornamental                 | Whole plant | Planted in private gardens                  |
|                                                                                |                  | Rites                      | Leaves      | Ornaments in floral bouquets                |
|                                                                                |                  | Construction               | Leafs       | Roofs of houses and cabins                  |
| <i>Cocos nucifera</i> L., E, EE25385                                           | Coco             | Food                       | Fruit       | Raw pulp and its water, and to make candies |
| <i>Washingtonia filifera</i> (Linden ex André) H.Wendl. ex de Bary, N, EE25386 | Palma            | Ornamental                 | Whole plant | Planted in private gardens                  |
|                                                                                |                  | Construction, roofs        | Leaves      | Dry                                         |
| ASPARAGACEAE                                                                   |                  |                            |             |                                             |
| <i>Agave lechuguilla</i> Torr., N, EE25251                                     | Lechugilla       | Healthy hair               | Root        | Milled, raw, used as shampoo                |

## Continued Appendix A

| Scientific name                                               | Common name    | Uses (system)      | Part used      | Method of use                                                                                                                                                    |
|---------------------------------------------------------------|----------------|--------------------|----------------|------------------------------------------------------------------------------------------------------------------------------------------------------------------|
| <i>Agave americana</i> L. var. <i>americana</i> , N, EE25251b | Maguey         | Fibers             | Leaves         | Leaves are divided into multiple fibers used to make woven products                                                                                              |
|                                                               |                | Food               | Root           | Boiled and fermented (to prepare alcoholic beverages)                                                                                                            |
|                                                               |                | Living fences      | Whole plant    | Planted in private gardens                                                                                                                                       |
|                                                               |                | Food               | Root           | Aguamiel (sap), raw or cooked to make syrup                                                                                                                      |
|                                                               |                | Food (quiotte)     | Peduncle       | Cooked in a well, with hot stones and firewood, covered for 24 hours                                                                                             |
|                                                               |                | Food               | Flowers        | Cooked                                                                                                                                                           |
|                                                               |                | Food               | Root           | Boiled and fermented (to prepare alcoholic beverages)                                                                                                            |
|                                                               |                | Ornamental         | Whole plant    | Planted in public and private gardens                                                                                                                            |
|                                                               |                | Construction       | Peduncle (dry) | Livestock keeper                                                                                                                                                 |
|                                                               |                | Living fences      | Whole plant    | Planted in private gardens                                                                                                                                       |
| <i>Agave aff. scabra</i> Ortega, N, EE25251c                  | Maguey, bronco | Food (quiotte)     | Peduncle       | Cooked in a well, with hot stones and firewood, covered for 24 hours                                                                                             |
|                                                               |                | Fibers             | Leaves         | Used to make ties                                                                                                                                                |
|                                                               |                | Living fences      | Whole plant    | Planted in private gardens                                                                                                                                       |
|                                                               |                | Living fences      | Whole plant    | Planted in private gardens                                                                                                                                       |
| <i>Asparagus setaceus</i> Kunth, E, EE25332                   | Hoja elegante  | Ornamental         | Whole plant    | Planted in private gardens                                                                                                                                       |
| <i>Dasyllirion berlandieri</i> S. Watson, N, EE25253          | Sotol          | Food               | Root           | Boiled and fermented (to prepare alcoholic beverages)                                                                                                            |
|                                                               |                | Rites and religion | Leaves (base)  | With the base of the leaves, structures similar to flowers are made that adorn the main square and streets in the celebration of the patronal feast of San Pedro |

## Continued Appendix A

| Scientific name                                                     | Common name      | Uses (system)                                              | Part used                | Method of use                                                                                                                   |
|---------------------------------------------------------------------|------------------|------------------------------------------------------------|--------------------------|---------------------------------------------------------------------------------------------------------------------------------|
| <i>Polianthes tuberosa</i> L., N, EE25254                           | Nardo            | Ornamental                                                 | Whole plant              | Planted in private gardens                                                                                                      |
| <i>Sansevieria trifasciata</i> Prin., E, EE25498                    | Lengua de suegra | Ornamental                                                 | Whole plant              | Planted in private and public gardens                                                                                           |
| <i>Yucca filifera</i> Chabaud, N, EE25155                           | Palma china      | Food                                                       | Flowers (called chochas) | Raw, collected before opening and the reproductive structures are removed so that when cooking they do not make the food bitter |
| <i>Yucca filifera</i> Chabaud, N, EE25155                           | Palma china      | Food                                                       | Fuits (called dátiles)   | Raw                                                                                                                             |
|                                                                     |                  | Food                                                       | Fruit                    | Raw                                                                                                                             |
|                                                                     |                  | Ornamental                                                 | Whole plant              | Raw                                                                                                                             |
| <i>Yucca treculeana</i> Carrière, N, EE25155b                       | Palma samandoca  | Food                                                       | Flowers (called chochas) | Raw, collected before opening and the reproductive structures are removed so that when cooking they do not make the food bitter |
|                                                                     |                  | Live fences                                                | Whole plant              | Planted in private gardens                                                                                                      |
| <b>ASPHODELACEAE</b>                                                |                  |                                                            |                          |                                                                                                                                 |
| <i>Kalanchoe blosfeldiana</i> Poelln., E, EE25152                   | Brujita          | Ornamental, for its beautiful fleshy leaves                | Whole plant              | Planted in private gardens                                                                                                      |
| <i>Kalanchoe digremontiana</i> Raym.-Hamet & H. Perrier, E, EE25333 | Urania           | Medicinal (endocrin system), anti inflammatory             | Sap                      | Raw, drink the sap                                                                                                              |
|                                                                     |                  | Medicinal (gastric system), heal gastrointetinal problems  | Leaves (pulp)            | Raw, milled, drink the sap                                                                                                      |
|                                                                     |                  | Ornamental                                                 | Whole plant              | Planted in private gardens                                                                                                      |
| <b>ASTERACEAE</b>                                                   |                  |                                                            |                          |                                                                                                                                 |
| <i>Artemisia ludoviciana</i> Nutt., N, EE25256, EE25334             | Estafiate        | Medicinal (gastrointestinal system), diarrhea, flatulences | Leaves and stems         | Boiled, drink infusion                                                                                                          |

## Continued Appendix A

| Scientific name                                     | Common name                                | Uses (system)                                                             | Part used                                 | Method of use                                                      |
|-----------------------------------------------------|--------------------------------------------|---------------------------------------------------------------------------|-------------------------------------------|--------------------------------------------------------------------|
| <i>Baccharis salicifolia</i> Nutt, N, EE25258       | Jara, jarilla                              | Medicinal (gastro-intestinal system), diarrhea, flatulences               | Leaves and stems                          | Cut into pieces, boil in water, drink the solution                 |
| <i>Calea oliveri</i> B.L.Rob. & Greenm., N, EE25368 | Ámbula                                     | Medicinal (nervous system), insomnia                                      | Leaves                                    | Boiled in water, drink the solution                                |
| <i>Chrysactinia mexicana</i> A. Gray, N, EE25370    | Hierba de San Nicolás                      | Medicinal (Reproductive system), aphrodisiac                              | Leaves                                    | Boiled in water, drink the solution                                |
| <i>Chrysanthemum morifolium</i> Ramat., EE25222     | Crisantemo                                 | Ornamental                                                                | Whole plant                               | Planted in private gardens                                         |
| <i>Conyza filaginoides</i> (DC.) Hieron, N, EE25497 | Simonillo                                  | Ornamental                                                                | Whole plant                               | Planted in private gardens                                         |
|                                                     |                                            | Medicinal (gastro-intestinal system), diarrhea, colic                     | Leaves and stems                          | Boiled in water, drink the solution                                |
|                                                     |                                            | Medicinal (endocrine system), diabetes and cancer                         | Leaves and stems                          | Boiled in water, drink the solution                                |
| <i>Dahlia coccinea</i> Cav., N, EE25388             | Dalia (the representative plant of Mexico) | Ornamental, by its showy and big inflorescences with red external flowers | Whole plant                               | Planted in private gardens                                         |
| <i>Flourensia cernua</i> DC., N, EE25387            | Hojasé                                     | Medicinal (gastro-intestinal system), constipation                        | Leaves                                    | Boil only 3-4 leaves, very astringent effect and very bitter taste |
| <i>Gnaphalium viscosum</i> Kunth, N, EE25389        | Gordolobo                                  | Medicinal (respiratory system), cough, throat pain                        | Stems, leaves, inflorescences and flowers | Boiled in water, drink the solution                                |

## Continued Appendix A

| Scientific name                                                      | Common name | Uses (system)                                                    | Part used                                              | Method of use                                                           |
|----------------------------------------------------------------------|-------------|------------------------------------------------------------------|--------------------------------------------------------|-------------------------------------------------------------------------|
| <i>Grindelia inuloides</i> Willd. var. <i>inuloides</i> , N, EE25390 | Árnica      | Medicinal (Skeletal-muscular system), external wounds            | Leaves and inflorescences, boiled, the solution use as | Boiled in hot wtaer, drink the solution                                 |
| <i>Gutierrezia sarothrae</i> (Pursh) Britton & Rusby, N, EE25496     | Amargosa    | Medicinal (broken bones),                                        | Leaves                                                 | Used as plaster (glutinous stems, sticky)                               |
| <i>Gymnopserma glutinosum</i> Less., N, EE25369                      | Marica      | Fibers                                                           | Branches                                               | Dry, they                                                               |
|                                                                      |             | Household items                                                  | Leaves and stems                                       | Dried, intertwine and tie and attach to a stick to make homemade brooms |
| <i>Helianthus annuus</i> L., N, EE24495                              | Girasol     | Forage                                                           | Whole plant                                            | Raw                                                                     |
| <i>Lactuca sativa</i> L., E, EE25391                                 | Lechuga     | Food                                                             | Leaves                                                 | Raw, previosly disinfected with chlorine                                |
| <i>Machaeranthera tanacetifolia</i> (Kunth) Nees, N, EE25494         | Árnica      | Medicinal                                                        | Leaves and inflorescences                              | Boiled, the solution used as cataplasm                                  |
| <i>Matricaria recutita</i> L., E, EE25493                            | Manzanilla  | Medicinal (gastro-intestinal system), colic, stomach ache        | Leaves                                                 | Boiled, drink the solution                                              |
| <i>Parthenium hysterophorus</i> L., N, EE25492                       | Amargoso    | Mosquito repellent                                               | Whole plant (dry)                                      | Burning in the yard, the smoke produced repels insects and other pests  |
|                                                                      |             | Household items                                                  | Leaves and stems                                       | Dried, intertwine and tie and attach to a stick to make homemade brooms |
| <i>Tagetes lucida</i> (Sweet) Voss, N, EE25491                       | Yerbanís    | Beverage                                                         | Leaves, stems, inflorescens, and flowers               | Boiled, drink as tea                                                    |
|                                                                      |             | Medicinal (gastro-intestinal system), stomach ache, colic, ulcer | Leaves, stems, inflorescens, and flowers               | Boiled, drink as tea                                                    |

## Continued Appendix A

| Scientific name                                                    | Common name          | Uses (system)                                                     | Part used                                         | Method of use                                                              |
|--------------------------------------------------------------------|----------------------|-------------------------------------------------------------------|---------------------------------------------------|----------------------------------------------------------------------------|
| <i>Tanacetum parthenium</i> (L.) Sch.Bip., E, EE25490              | Altamisa             | Mosquito repellent                                                | Whole plant                                       | Alive, inside the house                                                    |
|                                                                    |                      | Medicinal (gastric system), stomach ache                          | Leaves and stems                                  | Boiled, drink the solution                                                 |
| <i>Taraxacum officinale</i> (L.) Weber ex F. H.Wigg., E, EE25489   | Diente de león       | Food                                                              | Leaves                                            | Raw (previously disinfected with chlorine)                                 |
| <i>Trixis californica</i> Kellogg, N, EE25488                      | Árnica               | Forage<br>Medicinal                                               | Whole plant<br>Leaves and stems                   | Raw<br>Boiled, drink the solution                                          |
| <i>Zinnia elegans</i> L., N, EE25335                               | Cartulina            | Ornamental                                                        | Whole plant                                       | Planted in private and public gardens                                      |
| <b>BALSAMINACEAE</b>                                               |                      |                                                                   |                                                   |                                                                            |
| <i>Impatiens hawkeri</i> W. Bull, E, EE25219                       | Belén                | Ornamental                                                        | Whole plant                                       | Planted in private gardens                                                 |
| <b>BEGONIACEAE</b>                                                 |                      |                                                                   |                                                   |                                                                            |
| <i>Begonia gracilis</i> Kunth, N, EE25236                          | Begonia              | Ornamental                                                        | Whole plant                                       | Planted in private gardens                                                 |
| <b>BIGNONIACEAE</b>                                                |                      |                                                                   |                                                   |                                                                            |
| <i>Chilopsis linearis</i> (Cav.) Sweet, N, EE25487                 |                      | Ornamental, by its beautiful flowers                              | Whole plant                                       | Planted in private and public gardens                                      |
| <i>Tecoma stans</i> (L.) Juss. ex Kunth, N, EE25218                | Tronadora, San Pedro | Ornamental                                                        | Whole plant                                       | Planted in public and private gardens                                      |
| <b>BORAGINACEAE</b>                                                |                      |                                                                   |                                                   |                                                                            |
| <i>Cordia boissieri</i> A. DC., N, EE25157                         | Anacahuita           | Medicinal (Respiratory system), pneumonia<br>Ornamental<br>Forage | Flowers and fruit (pulp)<br>Whole plant<br>Fruits | Boiled, drink the infusion<br>Planted in public and private gardens<br>Raw |
| <i>Ehretia anacua</i> (Terán & Berland.) I. M. Johnst., N, EE25163 | Anacua               | Ornamental                                                        | Whole plant                                       | Planted in public and private gardens                                      |

## Continued Appendix A

| Scientific name                                  | Common name  | Uses (system)                                                        | Part used        | Method of use                                                                          |
|--------------------------------------------------|--------------|----------------------------------------------------------------------|------------------|----------------------------------------------------------------------------------------|
| BRASSICACEAE                                     |              |                                                                      |                  |                                                                                        |
| <i>Brassica oleracea</i> L., E, EE25486          | Repollo      | Food                                                                 | Leaves           | Raw or cooked with other vegetables.                                                   |
| <i>Lepidium peruvianum</i> G. Chacón, E, EE25336 | Raíz peruana | Medicinal<br>(gastrointestinal,<br>endocrin, and urinary<br>systems) | Root             | Boiled, drink the infusion                                                             |
| <i>Rorippa officinale</i> R. Br., E, EE25485     | Berro        | Medicinal (endocrin<br>system), protstate<br>problems                | Leaves and stems | Boiled, eat and drink infusion                                                         |
| <i>Raphanus sativus</i> L., E, EE25484           | Rábano       | Food                                                                 | Leaves           | Raw (previously disinfected with chlorine in<br>water) or cooked with other vegetables |
|                                                  |              | Food                                                                 | Root             | Raw, in salads                                                                         |
|                                                  |              | Medicinal (respiratory<br>system), asthma<br>problems                | Root             | Raw, pulp                                                                              |
|                                                  |              | Medicinal (Blood<br>system), lower blood<br>pressure                 | Root             | Raw, pulp                                                                              |
| BROMELIACEAE                                     |              |                                                                      |                  |                                                                                        |
| <i>Ananas comosus</i> (L.) Merr., E, EE25483     | Piña         | Food                                                                 | Fruit            | Raw                                                                                    |
|                                                  |              | Food                                                                 | Fruit juice      | Meat tenderizer                                                                        |
| <i>Hechtia podantha</i> Mez, N, EE25392          | Guapilla     | Fibers                                                               | Leaves           | Leaves are divided into multiple fibers used to<br>make woven products (ties)          |
| <i>Tillandsia usneoides</i> (L.) L., N, EE25231  | Paixtle      | Rites and religion                                                   | Leaves           | Dry, decorate the christmas tree                                                       |
|                                                  |              | Manufacture of articles                                              | Leaves           | To make pillows                                                                        |

## Continued Appendix A

| Scientific name                                                                    | Common name   | Uses (system)                                                                    | Part used                                                                                             | Method of use                                                                                  |
|------------------------------------------------------------------------------------|---------------|----------------------------------------------------------------------------------|-------------------------------------------------------------------------------------------------------|------------------------------------------------------------------------------------------------|
| <b>BUDDLEJACEAE</b>                                                                |               |                                                                                  |                                                                                                       |                                                                                                |
| <i>Buddleja cordata</i> ssp. <i>tomentella</i> (Standl.)<br>E.M.Norman, N, EE25393 | Tepozán       | Medicinal (skeletal-muscular system),<br>general pain                            | Leaves                                                                                                | Boiled in water, the solution used as cataplasm                                                |
| <b>CACTACEAE</b>                                                                   |               |                                                                                  |                                                                                                       |                                                                                                |
| <i>Cylindropuntia imbricata</i> (Haw.) F.M.Knuth,<br>N, EE25246                    | Coyonoxtle    | Medicinal (skeletal-muscular system),<br>breaks, breaks and<br>fissures of bones | Stems pulp                                                                                            | Raw, use as cataplasm, smear the pulp on the<br>injured area and bandage                       |
| <i>Cylindropuntia leptocaulis</i> (DC.) F.M.Knuth,<br>N, EE25246b                  | Tasajillo     | Medicinal (endocrin<br>system) cancer                                            | Stems pulp                                                                                            | Boiled, drink the infusion                                                                     |
| <i>Echinocactus platyacanthus</i> Link & Otto, N,<br>EE25482                       | Biznaga burra | Food                                                                             | Stem pulp                                                                                             | Cooked with piloncillo (brown sugar) to make<br>candies                                        |
| <i>Hylocereus undatus</i> (Haw.) Britton & Rose,<br>N, EE25377                     | Pithaya       | Food                                                                             | Fruit                                                                                                 | Raw, blended with water to make drinks                                                         |
| <i>Lophophora williamsii</i> (Lem. ex Salm-Dyck)<br>J.M. Coult., N, EE25394        | Peyote        | Ornamental                                                                       | Whole plant                                                                                           | Planted in private gardens                                                                     |
|                                                                                    |               | Dye                                                                              | Fruit                                                                                                 | Raw, squeezed                                                                                  |
|                                                                                    |               | Spiritual-religious                                                              | Whole plant                                                                                           | Raw, eaten in pieces or blended in water and<br>drink the potion                               |
|                                                                                    |               | Medicinal (Skeletal-muscular system)                                             | Whole plant or cut<br>into pieces inside<br>alcohol and mixed<br>with marijuana<br>(Cannabis sativa), | Raw, cataplasm, rubbing on sore joints                                                         |
| <i>Mammillaria heyderi</i> Muehlenpf., N,<br>EE25395                               | Chilitos      | Medicinal (nervous<br>system), insomnia<br>Ornamental                            | Pieces of plant<br>Whole plant                                                                        | Raw, eaten in pieces or blended in water and<br>drink the potion<br>Planted in private gardens |

## Continued Appendix A

| Scientific name                                                              | Common name      | Uses (system)                                          | Part used                                                           | Method of use                                                          |
|------------------------------------------------------------------------------|------------------|--------------------------------------------------------|---------------------------------------------------------------------|------------------------------------------------------------------------|
| <i>Myrtillocactus geometrizans</i> (Mart. ex Pfeiff.)<br>Console, N, EE25396 | Garambuyo        | Living fences                                          | Whole plant                                                         | Planted in private gardens                                             |
| <i>Opuntia ficus-indica</i> (L.) Mill., N, EE25397                           | Nopal sin espina | Ornamental                                             | Whole plant                                                         | Planted in private gardens                                             |
|                                                                              |                  | Ornamental                                             | Whole plant                                                         | Planted in private gardens                                             |
|                                                                              |                  | Forage                                                 | Stems (cladodes)                                                    | Raw, cut into pieces and scorched (to remove thorns)                   |
|                                                                              |                  | Food                                                   | Stems (cladodes) and fruits                                         | Peeled and cut into pieces, raw or cooked; fruit eaten raw             |
|                                                                              |                  | Medicinal (endocrin system), low cholesterol           | Stems                                                               | Raw, cut into pieces and eat                                           |
| <i>Opuntia lindheimeri</i> Engelm., N, EE25249                               | Nopal            | Forage                                                 | Stems (cladodes) and fruits                                         | Raw, cut into pieces and scorched (to remove thorns); fruits eaten raw |
|                                                                              |                  | Food                                                   | Stems                                                               | Raw                                                                    |
|                                                                              |                  | Medicinal (endocrin system), low cholesterol           | Stems                                                               | Raw, stem pulp                                                         |
|                                                                              |                  | Medicinal (gastrointestinal system), improve digestion | Stems                                                               | Raw, stem pulp, liquefied                                              |
|                                                                              |                  |                                                        |                                                                     |                                                                        |
| CANNABACEAE                                                                  |                  |                                                        |                                                                     |                                                                        |
| <i>Celtis leavigata</i> Willd., N, EE25233b                                  | Palo blanco      | Ornamental                                             | Whole plant                                                         | Planted in private gardens                                             |
| <i>Celtis pallida</i> Torr., N, EE25233                                      | Granjeno         | Food                                                   | Fruits                                                              | Raw or boiled to mkae syrup                                            |
|                                                                              |                  | Ornamental                                             | Whole plant                                                         | Planted in private gardens                                             |
| CANNABINACEAE                                                                |                  |                                                        |                                                                     |                                                                        |
| <i>Cannabis sativa</i> L., E, EE25481                                        | Mariguana        | Medicinal (Skeletal-muscular system)                   | Female inflorescences and leaves into alcohol and mixed with peyote | Cataplasm, rubbing on sore joints                                      |

## Continued Appendix A

| Scientific name                               | Common name      | Uses (system)                                      | Part used             | Method of use              |
|-----------------------------------------------|------------------|----------------------------------------------------|-----------------------|----------------------------|
|                                               |                  | Recreational playful use                           | Female inflorescences | Smoked                     |
| <b>CANNACEAE</b>                              |                  |                                                    |                       |                            |
| <i>Canna indica</i> L., E, EE25240            | Coyol            | Ornamental, for its beautiful flowers              | Whole plant           | Planted in private gardens |
| <b>CAPRIFOLIACEAE</b>                         |                  |                                                    |                       |                            |
| <i>Lonicera japonica</i> Thunb., E, EE26167   | Madreselva       | Ornamental, for the delicious aroma of its flowers | Whole plant           | Planted in private gardens |
| <b>CARICACEAE</b>                             |                  |                                                    |                       |                            |
| <i>Carica papaya</i> L., N, EE25480           | Papaya           | Food                                               | Fruit                 | Raw, or in fruit salads    |
| <b>CARYOPHYLLACEAE</b>                        |                  |                                                    |                       |                            |
| <i>Dianthus caryophyllus</i> L., E, EE25224   | Clavel           | Ornamental, for its beautiful flowers              | Whole plant           | Planted in private gardens |
| <i>Dianthus deltoides</i> L., E, EE25440      | Clavelina        | Ornamental, for its beautiful flowers              | Whole plant           | Planted in private gardens |
| <i>Gypsophila paniculata</i> L., E, EE25441   | Ilusión          | Ornamental, for its beautiful flowers              | Whole plant           | Planted in private gardens |
| <b>COMMELINACEAE</b>                          |                  |                                                    |                       |                            |
| <i>Commelina coelestis</i> Willd., N, EE25442 | Hierba del pollo | Ornamental, for its beautiful flowers              | Whole plant           | Planted in private gardens |
| <b>COSTACEAE</b>                              |                  |                                                    |                       |                            |
| <i>Costus igneus</i> N. E. Br., E, EE25443    | Insulina         | Medicinal (endocrin system), diabetes              | Leaves                | Boiled, drink the infusion |
| <b>CONVOLVULACEAE</b>                         |                  |                                                    |                       |                            |
| <i>Ipomoea batatas</i> (L.) Lam., N, EE25444  | Camote           | Food                                               | Root                  | Rosted or boiled           |

## Continued Appendix A

| Scientific name                                               | Common name        | Uses (system)                                           | Part used   | Method of use                              |
|---------------------------------------------------------------|--------------------|---------------------------------------------------------|-------------|--------------------------------------------|
| <i>Ipomoea purpurea</i> (L.) Roth, N, EE25445                 | Manto de la virgen | Ornamental, for its beautiful purple flowers            | Whole plant | Planted in private gardens                 |
| <b>CRASSULACEAE</b>                                           |                    |                                                         |             |                                            |
| <i>Echeveria simulans</i> Rose, N, EE25446                    | Siempreviva        | Ornamental, for its beautiful fleshy leaves             | Whole plant | Planted in private gardens                 |
|                                                               |                    | Medicinal (ophthalmic system), red eyes, irritated eyes | Sap         | Eye drops                                  |
| <i>Sedum diffusum</i> S. Watson, N, EE25437                   | Chismes            | Ornamental, for its beautiful fleshy leaves             | Whole plant | Planted in private gardens                 |
|                                                               |                    | Medicinal (ophthalmic system), red eyes, irritated eyes | Sap         | Eye drops                                  |
| <i>Sedum palmeri</i> S. Watson, N, EE25438                    | Deditos            | Ornamental, for its beautiful fleshy leaves             | Whole plant | Planted in private gardens                 |
| <b>CUCURBITACEAE</b>                                          |                    |                                                         |             |                                            |
| <i>Citrullus lanatus</i> (Thunb.) Matsum. & Nakai, E, EE25151 | Sandía             | Food                                                    | Fruit       | Raw, cut into pieces                       |
|                                                               |                    | Forage (pigs)                                           | Fruit peel  | Raw                                        |
| <i>Cucumis anguria</i> L., E, EE25364                         | Pepinillo          | Food                                                    | Fruit       | Boiled, into brine                         |
|                                                               |                    | Forage                                                  | Fruit       | Raw                                        |
| <i>Cucumis melo</i> L., E, EE25365                            | Melón              | Food                                                    | Fruit       | Raw, cut into pieces                       |
|                                                               |                    | Forage (pigs)                                           | Fruit peel  | Raw                                        |
| <i>Cucurbita ficifolia</i> Bouché, E, EE25366                 | Chilacayote        | Food                                                    | Fruit       | Boiled in water with sugar to make candies |
|                                                               |                    | Forage                                                  | Fruit       | Raw                                        |
|                                                               |                    | Food                                                    | Fruit       | Cooked with other vegetables               |

## Continued Appendix A

| Scientific name                                 | Common name | Uses (system)  | Part used                 | Method of use                                        |
|-------------------------------------------------|-------------|----------------|---------------------------|------------------------------------------------------|
| <i>Cucurbita moschata</i> Duchesne, N, EE25367  | Calabaza    | Food           | Fruit                     | Cooked or boiled in water with sugar to make candies |
| <i>Cucurbita pepo</i> L., N, EE25439            | Calabaza    | Forage         | Leaves                    | Raw                                                  |
|                                                 |             | Food           | Fruit                     | Cooked                                               |
|                                                 |             | Food           | Seeds                     | Raw, dried, toasted and salty                        |
|                                                 |             | Forage         | Leaves and fruits         | Raw                                                  |
| <i>Luffa aegyptiaca</i> Mill., E, EE25435       | Estropajo   | Fibers         | Inner part of dried fruit | To wash dishes or to carve skin for bathing          |
| <i>Sechium edule</i> (Jacq.) Sw., N, EE25479    | Chayote     | Food           | Fruit                     | Raw, cut into pieces or boiled                       |
| <b>CUPRESSACEAE</b>                             |             |                |                           |                                                      |
| <i>Cupressus arizonica</i> Greene, N, EE25153   | Cedro       | Ornamental     | Whole plant               | Planted in public and private gardens                |
|                                                 |             | Fuel           | Wood                      | Dry                                                  |
|                                                 |             | Furniture      | Wood                      | Dry                                                  |
|                                                 |             | Rites-religion | Sap (resin)               | Used as incense during religious prayers             |
|                                                 |             | Construction   | Wood                      | Dry, to make columns and beams of houses             |
| <i>Cupressus lousitanica</i> Mill., E, EE25153a | Ciprés      | Ornamental     | Whole plant               | Planted in public and private gardens                |
|                                                 |             | Furniture      | Wood                      | Dry                                                  |
|                                                 |             | Fuel           | Wood                      | Dry                                                  |
|                                                 |             | Construction   | Wood                      | Dry, to make columns and beams of houses             |
| <i>Cupressus sempervirens</i> L., E, EE25378    | Píncel      | Ornamental     | Whole plant               | Planted in public and private gardens                |
|                                                 |             | Fuel           | Wood                      | Dry                                                  |
|                                                 |             |                | Construction              | Wood, Dry, to make columns and beams of houses       |
| <i>Juniperus flaccida</i> Schltdl., N, EE25436  | Táscate     | Ornamental     | Whole plant               | Planted in public and private gardens                |

## Continued Appendix A

| Scientific name                                             | Common name       | Uses (system)                           | Part used           | Method of use                            |
|-------------------------------------------------------------|-------------------|-----------------------------------------|---------------------|------------------------------------------|
|                                                             |                   | Fuel                                    | Wood                | Dry                                      |
|                                                             |                   | Construction                            | Wood                | Dry, to make columns and beams of houses |
| <i>Thuja occidentalis</i> L., E, EE25172                    | Tuya              | Ornamental                              | Whole plant         | Planted in public and private gardens    |
| <b>CYCADACEAE</b>                                           |                   |                                         |                     |                                          |
| <i>Cycas revoluta</i> Thunb., N, EE25434                    | Chamal, cica      | Ornamental                              | Whole plant         | Planted in public and private gardens    |
| <i>Dioon edule</i> Lindl., N, EE25375                       | Chamal            | Ornamental                              | Whole plant         | Planted in public and private gardens    |
|                                                             |                   | Food                                    | Seeds               | To make flour and tortillas              |
| <b>EBENACEAE</b>                                            |                   |                                         |                     |                                          |
| <i>Diospyros palmeri</i> Eastw., N, EE25432                 | Chapote           | Ornamental                              | Whole plant         | Planted in public and private gardens    |
|                                                             |                   | Forage                                  | Fruits              | Raw, for cattle, sheeps, goats and pigs  |
|                                                             |                   | Fuel                                    | Trunks and branches | Dry                                      |
|                                                             |                   | Construction                            | Wood                | Dry, to make columns and beams of houses |
| <b>EQUISETACEAE</b>                                         |                   |                                         |                     |                                          |
| <i>Equisetum laevigatum</i> A. Braun, N, EE25433            | Cola de caballo   | Medicinal (urinary system), kidney pain | Stems               | Boiled, drink the infusion               |
| <b>EUPHORBIACEAE</b>                                        |                   |                                         |                     |                                          |
| <i>Acalypha hederacea</i> Torr., N, EE25173                 | Hierba del cáncer | Medicinal (endocrin system), cancer     | Leaves and stems    | Boiled, drink the solution               |
|                                                             |                   | Forage                                  | Whole plant         | Raw                                      |
| <i>Croton suaveolens</i> Torr., N, EE25478                  | Salvia            | Medicinal (blood system), anemia        | Leaves and stems    | Boiled in water, drink the infusion      |
| <i>Euphorbia pulcherrima</i> Willd. ex Klotzsch, N, EE25156 | Noche buena       | Ornamental                              | Whole plant         | Planted in public and private gardens    |

## Continued Appendix A

| Scientific name                                                           | Common name      | Uses (system)                                       | Part used         | Method of use                                |
|---------------------------------------------------------------------------|------------------|-----------------------------------------------------|-------------------|----------------------------------------------|
| <i>Euphorbia dentata</i> Michx., N, EE25261                               | Golondrina       | Medicinal (Respiratory system), sinusitis           | Leaves and stems  | Boil in water, e infusion used a nasal drops |
| <i>Euphoria milii</i> Des Moul., E, EE25261b                              | Corona de Cristo | Ornamental                                          | Whole plant       | Planted in public and private gardens        |
| <i>Jatropha dioica</i> Sessé, N, EE25431                                  | Sangre de Drago  | Medicinal (dermatologic system), hair growth, fungi |                   | Milled, the pulp used as shampoo             |
|                                                                           |                  | Medicinal (gastric system), harden the gums         | Leaves and stems  | Milled, chew and spit out the pulp           |
| <i>Ricinus communis</i> L., E, EE25159                                    | Higuerilla       | Ornamental                                          | Whole plant       | Planted in public and private gardens        |
| <i>Sapium sebiferum</i> (L.) Roxb., E, EE25164                            | Sapium           | Ornamental                                          | Whole plant       | Planted in public and private gardens        |
| <i>Tragia ramosa</i> Torr., N, EE25363                                    | Mala mujer       | Medicinal (urinary system), kidney diseases         | Leaves            | Boiled, drink the infusion                   |
| <b>FABACEAE</b>                                                           |                  |                                                     |                   |                                              |
| <i>Arachis hypogaea</i> L., E, EE25429                                    | Cacahuat         | Food                                                | Seeds             | Raw                                          |
|                                                                           |                  | Forage                                              | Leaves            | Raw                                          |
| <i>Bauhinia purpurea</i> L., N, EE25225                                   | Pata de vaca     | Ornamental                                          | Whole plant       | Planted in public and private gardens        |
|                                                                           |                  | Medicinal (gastrointestinal system)                 | Leaves            | Boiled, drink the infusion                   |
| <i>Calliandra conferta</i> A.Gray, N, EE25430                             | Charrasquillo    | Forage                                              | Leaves and fruits | Raw                                          |
| <i>Cercis canadensis</i> L., N, EE25165                                   | Duraznillo       | Ornamental                                          | Whole plant       | Planted in public and private gardens        |
| <i>Cicer arietinum</i> L., E, EE25379                                     | Garbanzo         | Food                                                | Seeds             | Cooked                                       |
| <i>Erythrostemon mexicanus</i> (A. Gray) Gagnon & G. P. Lewis, N, EE25229 | Potro            | Ornamental                                          | Whole plant       | Planted in public and private gardens        |
| <i>Eysenhardtia texana</i> Scheele, N, 25477                              | Palo azul        | Ornamental                                          | Whole plant       | Planted in public and private gardens        |

## Continued Appendix A

| Scientific name                                                                          | Common name | Uses (system) | Part used               | Method of use                                                                   |
|------------------------------------------------------------------------------------------|-------------|---------------|-------------------------|---------------------------------------------------------------------------------|
| <i>Lens culinaris</i> Medik, E, EE25428                                                  | Lenteja     | Food          | Seeds                   | Cooked                                                                          |
| <i>Pachyrhizus erosus</i> (L.) Urb., N, EE25476                                          | Jicama      |               |                         |                                                                                 |
| <i>Phaseolus vulgaris</i> L., N, EE25475                                                 | Frijol      | Food          | Seeds                   | Cooked                                                                          |
| <i>Pisum sativum</i> L., E, EE25474                                                      | Chícharo    | Food          | Seeds                   | Cooked                                                                          |
| <i>Prosopis glandulosa</i> var. <i>torreyana</i><br>(L.D.Benson) M.C.Johnst., N, EE25473 | Mezquite    | Construction  | Tunks and branches      | Dry, to make columns and beams of houses                                        |
|                                                                                          |             | Fuel          | Tunks and branches      | Charcoal                                                                        |
|                                                                                          |             | Forage        | Leaves and fruits       | Raw                                                                             |
| <i>Vachellia farnesiana</i> (L.) Wight & Arn., N, EE25234                                | Huizache    | Construction  | Tunks and branches      | Dry                                                                             |
|                                                                                          |             | Fuel          | Tunks and branches      | Charcoal                                                                        |
|                                                                                          |             | Forage        | Leaves and fruits       | Raw                                                                             |
| <i>Vicia faba</i> L., E, EE25238                                                         | Haba        | Food          | Seeds                   | Cooked                                                                          |
| <b>FAGACEAE</b>                                                                          |             |               |                         |                                                                                 |
| <i>Quercus virginiana</i> Mill., N, EE25166                                              | Encino      | Construction  | Wood                    | Dry, to manufacture furniture and household goods                               |
|                                                                                          |             | Forage        | Seeds (called bellotas) | Raw                                                                             |
|                                                                                          |             | Fuel          | Wood                    | Dry, cut into pieces                                                            |
| <i>Quercus canbyi</i> Trel., N, EE25427                                                  | Encino      | Ornamental    | Whole plant             | Planted in public and private gardens                                           |
|                                                                                          |             | Ornamental    | Whole plant             | Planted in public and private gardens                                           |
|                                                                                          |             | Construction  | Wood                    | Dry, to manufacture furniture, household goods, and columns and beams of houses |
|                                                                                          |             | Forage        | Seeds (called bellotas) | Raw                                                                             |
|                                                                                          |             | Fuel          | Wood                    | Dry, cut into pieces                                                            |

## Continued Appendix A

| Scientific name                                           | Common name       | Uses (system) | Part used               | Method of use                                                                           |
|-----------------------------------------------------------|-------------------|---------------|-------------------------|-----------------------------------------------------------------------------------------|
| <i>Quercus polymorpha</i> Schltdl. & Cham., N, EE25426    | Encino            | Construction  | Wood                    | Dry, to manufacture furniture, household goods, and columns and beams of houses         |
|                                                           |                   | Ornamental    | Whole plant             | Planted in public and private gardens                                                   |
|                                                           |                   | Ornamental    | Whole plant             | Planted in public and private gardens                                                   |
|                                                           |                   | Forage        | Seeds (called bellotas) | Raw                                                                                     |
|                                                           |                   | Fuel          | Wood                    | Dry, cut into pieces                                                                    |
|                                                           |                   | Construction  | Wood                    | To manufacture furniture and household goods                                            |
| <b>FOUQUERACEAE</b>                                       |                   |               |                         |                                                                                         |
| <i>Fouquieria splendens</i> Engelm., N, EE25380           | Ocotillo, albarda | Living fences | Stems                   | Stems are cut and planted in rows, eventually producing root and leaves (living fences) |
|                                                           |                   | Ornamental    | Whole plant             | Planted in private gardens                                                              |
| <b>GERANIACEAE</b>                                        |                   |               |                         |                                                                                         |
| <i>Pelargonium hortorum</i> L.H. Bailey, E, EE25227       | Geranio           | Ornamental    | Whole plant             | Planted in private gardens                                                              |
| <b>GESNERIACEAE</b>                                       |                   |               |                         |                                                                                         |
| <i>Tulipa gesneriana</i> L., E, EE25472                   | Tulipán           | Ornamental    | Whole plant             | Planted in private gardens                                                              |
| <b>HYDRANGEECEAE</b>                                      |                   |               |                         |                                                                                         |
| <i>Hydrangea macrophylla</i> (Thunb.) Ser., E, EE25471    | Hortensia         | Ornamental    | Whole plant             | Planted in private gardens                                                              |
| <b>JUGLANDACEAE</b>                                       |                   |               |                         |                                                                                         |
| <i>Carya illinoinensis</i> (Wangenh.) K. Koch, N, EE25168 | Nogal             | Forage        | Leaves                  | Raw                                                                                     |
|                                                           |                   | Food          | Fruit                   | Raw                                                                                     |

## Continued Appendix A

| Scientific name                                                       | Common name               | Uses (system)                                | Part used   | Method of use                              |             |
|-----------------------------------------------------------------------|---------------------------|----------------------------------------------|-------------|--------------------------------------------|-------------|
| <i>Carya myristiciformis</i> (F. Michx.) Nutt. ex Elliott, N, EE25470 | Nogal                     | Construction                                 | Wood        | Dry                                        |             |
|                                                                       |                           | Fuel                                         | Wood        | Dry                                        |             |
|                                                                       |                           | Ornamental                                   | Whole plant | Planted in public and private gardens      |             |
|                                                                       |                           | Medicinal (endocrin system), diabetes        | Fruit       | Raw                                        |             |
|                                                                       |                           | Medicinal (dermic system), hair dye          | Bark        | Boiled in water, wash hair with solution   |             |
|                                                                       |                           | Ornamental                                   | Whole plant | Planted in public and private gardens      |             |
|                                                                       |                           | Medicinal (dermic system), hair dye          | Bark        | Boiled in water, wash hair with solution   |             |
| <i>Juglans major</i> (Torr.) A. Heller, N, EE25469                    | Nogal de nuez encarcelada | Forage                                       | Leaves      | Raw                                        |             |
|                                                                       |                           | Food                                         | Fruit       | Raw                                        |             |
|                                                                       |                           | Construction                                 | Wood        | Dry                                        |             |
|                                                                       |                           | Fuel                                         | Wood        | Dry                                        |             |
|                                                                       |                           | Ornamental                                   | Whole plant | Planted in public and private gardens      |             |
|                                                                       |                           | Medicinal (dermic system), hair dye          | Bark        | Boiled in water, wash hair with solution   |             |
|                                                                       |                           | Medicinal (gastrointestinal system), colics  | Leaves      | Boiled in water                            |             |
|                                                                       |                           | <b>LAMIACEAE</b>                             |             |                                            |             |
|                                                                       |                           | <i>Hedeoma drummondii</i> Benth., N, EE25468 | Poleo       | Medicinal (Nervous system), to fall asleep | Whole plant |
| <i>Lavandula angustifolia</i> Mill., E                                | Lavanda                   | Ornamental                                   | Whole plant | Planted in public and private gardens      |             |

## Continued Appendix A

| Scientific name                                                                     | Common name             | Uses (system)                                               | Part used        | Method of use                                                 |
|-------------------------------------------------------------------------------------|-------------------------|-------------------------------------------------------------|------------------|---------------------------------------------------------------|
| <i>Marrubium vulgare</i> L., E, EE25424                                             | Marrubio                | Medicinal (gastro-intestinal system)                        | Leaves           | Boiled, drink the solution                                    |
| <i>Melissa officinalis</i> L., E, EE25425                                           | Toronjil                | Medicinal (respiratory system), cough                       | Leaves and stems | Boiled, drink the infusion, chew and swallow leaves and stems |
|                                                                                     |                         | Ornamental, for its delicious aroma and to repel mosquitoes | Whole plant      | Planted in private gardens                                    |
|                                                                                     |                         | Medicinal (gastro-intestinal system), colics                | Leaves and stems | Boiled, drink the infusion                                    |
|                                                                                     |                         | Medicinal (respiratory system), cough                       | Leaves and stems | Boiled, drink the infusion                                    |
| <i>Mentha piperita</i> L., E, EE25241                                               | Yerbabuena              | Medicinal (respiratory system), cough                       | Leaves and stems | Boiled, drink the infusion, chew and swallow leaves and stems |
|                                                                                     |                         | Medicinal (respiratory system), fever and cold              | Leaves and stems | Boiled, drink the infusion                                    |
| <i>Mentha spicata</i> L., E, EE25241b                                               | Yerbabuena              | Medicinal (gastro-intestinal system), spasms                | Leaves and stems | Boiled, drink the infusion                                    |
|                                                                                     |                         | Medicinal (respiratory system), flu and asthma              | Leaves           | Boiled, drink the infusion                                    |
| <i>Monarda citriodora</i> var. <i>austromontana</i> (Epling) B.L.Turner, N, EE25381 | Poleo cabezón, betónica | Medicinal (respiratory system), cough                       | Leaves and stems | Boiled, drink the infusion, chew and swallow leaves and stems |
|                                                                                     |                         | Medicinal (Nervous system), to fall asleep                  | Leaves           | Dry, put a piece of branch under the pillow at night          |
|                                                                                     |                         | Ornamental, for its delicious aroma and beautiful flowers   | Whole plant      | Planted in private gardens                                    |

## Continued Appendix A

| Scientific name                                  | Common name        | Uses (system)                                                    | Part used                 | Method of use                                                     |
|--------------------------------------------------|--------------------|------------------------------------------------------------------|---------------------------|-------------------------------------------------------------------|
| <i>Ocimum basilicum</i> L., E, EE25242           | Albahaca           | Medicinal (Nervous system), used agians insomnia, to fall asleep | Leaves and stems          | Boiled, drink the infusion                                        |
|                                                  |                    | Religious rites                                                  | Whole plant               | Part of the flower bouquets used in pilgrimages                   |
| <i>Origanum majorana</i> L., E, EE25257          | Orégano            | Food (condiment)                                                 | Leaves                    | Dry, added to broths and soups                                    |
|                                                  |                    | Medicinal (respiratory system), cough and cold                   | Leaves and stems          | Boiled, drink the infusion                                        |
| <i>Plectranthus coleoides</i> Benth., E, EE25362 | Vaporú             | Medicinal (respiratory system), cough                            | Leaves and stems          | Milled, mixed with glycerine and spread on the chest and nostrils |
|                                                  |                    | Religious rites                                                  | Whole plant               | Dry, milled, used as incense                                      |
|                                                  |                    | Ornamental, by its delicious aroma and beautiful flowers         | Whole plant               | Planted in private gardens                                        |
| <i>Poliomintha longiflora</i> A.Gray, N, EE25259 | Orégano de montaña | Food (condiment)                                                 | Leaves and stems          | Dry, added to broths and soups                                    |
|                                                  |                    | Medicinal (respiratory system), cough, throat pain               | Leaves and stems          | Boiled, drink the infusion                                        |
|                                                  |                    | Ornamental, by its beautiful flowers and aroma                   | Whole plant               | Planted in private gardens                                        |
| <i>Rosmarinus officinalis</i> L., E, EE25382     | Romero             | Medicinal (gastro-intestinal system) colics                      | Leaves                    | Boiled, drink the infusion                                        |
|                                                  |                    | Medicinal (respiratory system), nasal congetion                  | Stems, leaves and flowers | Cut into pieces, boiled, drink the infusion                       |

## Continued Appendix A

| Scientific name                       | Common name | Uses (system)                                             | Part used        | Method of use                       |
|---------------------------------------|-------------|-----------------------------------------------------------|------------------|-------------------------------------|
| Scutellaria sp., N, EE25422           | Mirto       | Ornamental, by its beautiful flowers and aroma            | Whole plant      | Planted in private gardens          |
|                                       |             | Condiment                                                 | Leaves           | Dry, added to flavor the food       |
|                                       |             | Ornamental, by its beautiful flowers and aroma            | Whole plant      | Planted in private gardens          |
| Teucrium cubense L., N, EE25423       | Verneba     | Medicinal (fever)                                         | Leaves and stems | Boiled, drink the solution          |
| Thymus vulgaris L., E, EE25360        | Tomillo     | Medicinal (respiratory system), cough and expectorant     | Leaves and stems | Boiled, drink the infusion          |
|                                       |             | Medicinal (dermic system), dermic infections              | Leaves           | Boilded, use as cataplasm           |
|                                       |             | Food (condiment)                                          | Leaves and stems | Dry, add to stews, soups and broths |
| LAURACEAE                             |             |                                                           |                  |                                     |
| Cinnamomum verum J.Presl., E, EE25361 | Canela      | Medicinal (gastro-intestinal system), stomach pain, vomit | Bark             | Boiled, drink the infusion          |
|                                       |             | Medicinal (respiratory system), cough and throat pain     | Bark             | Boiled, drink the infusion          |
|                                       |             | Medicinal (endocrinal system), diabetes                   | Bark             | Boiled, drink the infusion          |
|                                       |             | Medicinal (blood system), improve blood circulation       | Bark             | Boiled, drink the infusion          |
| Litsea glauscecens Kunth, N, EE25359  | Laurel      | Food (condiment)                                          | Leaves           | Dry, add to stews, soups and broths |

## Continued Appendix A

| Scientific name                           | Common name | Uses (system)                                                        | Part used    | Method of use                                            |
|-------------------------------------------|-------------|----------------------------------------------------------------------|--------------|----------------------------------------------------------|
| <i>Persea americana</i> Mill., N, EE25170 | Aguacate    | Ornamental, by its showy green stems                                 | Whole plant  | Planted in private gardens                               |
|                                           |             | Food                                                                 | Fruit        | Raw, used in multiple ways                               |
|                                           |             | Medicinal (respiratory system), asthma                               | Leaves       | Boiled, drink the infusion                               |
|                                           |             | Medicinal (circulatory system), arterial hypertension                | Leaves       | Boiled, drink the infusion                               |
| <i>Persea podadenia</i> S. F. Blake, N    | Salsafrás   | Medicinal (circulatory system), anemia                               | Bark         | Cut into pices, boiled, drink the infusion               |
| <b>LILIACEAE</b>                          |             |                                                                      |              |                                                          |
| <i>Allium cepa</i> L., E, EE25358         | Cebolla     | Food                                                                 | Stem         | Raw or boiled                                            |
|                                           |             | Medicinal (respiratory system), cough, asthma, flu                   | Stem         | Boiled, drink the infusion along with honey bee          |
|                                           |             | Medicinal (circulatory system), improve blood circulation            | Stems        | Boiled, drink the infusion                               |
| <i>Allium sativum</i> L., E, EE25421      | Ajo         | Medicinal (circulatory system), low cholesterol, improve circulation | Stems        | Boiled, drink the infusion, raw cutt into pieces, milled |
|                                           |             | Medicinal (dermic system), dermic wounds                             | Cloves       | Ground garlic cloves, the pulp is smeared on the wound   |
|                                           |             | Medicinal (auditive system), earache                                 | Cloves       | Milled, pulp is semeared inside the ears                 |
|                                           |             | Food (condiment)                                                     | Bulb (clove) | Raw or boiled, added to mutiple foods                    |

## Continued Appendix A

| Scientific name                                     | Common name | Uses (system)                                                    | Part used     | Method of use                                                                               |
|-----------------------------------------------------|-------------|------------------------------------------------------------------|---------------|---------------------------------------------------------------------------------------------|
|                                                     |             | Religious-rites                                                  | Complete bulb | Dry, several bulbs are braided and hung at the entrance of the houses to ward off bad vibes |
| <i>Allium</i> sp., N, EE25467                       | Cebollín    | Medicinal (auditive system)                                      | Bulb          | Raw, milled, the pulp is meared inside the ears                                             |
| <i>Lilium candidum</i> L., E, EE25466               | Lirio       | Ornamental, by its beautiful flowers                             | Whole plant   | Planted in private gardens                                                                  |
| LOMARIOPSIDACEAE                                    |             |                                                                  |               |                                                                                             |
| <i>Nephrolepis exaltata</i> (L.) Schott, N, EE25465 | Helecho     | Ornamental, by its beautiful perennial foliage                   | Whole plant   | Planted in pots in private gardens                                                          |
| LHYTRACEAE                                          |             |                                                                  |               |                                                                                             |
| <i>Heimia salicifolia</i> (Kunth) Link, N, EE25169  | Jarilla     | Medicinal (dermic system), dermatitis                            | Leaves        | Milled, boiled in water, use as cataplam                                                    |
| <i>Lagerstroemia indica</i> L., E, EE25244          | Crespón     | Ornamental, by its beautiful perennial foliage anf showy flowers | Whole plant   | Planted in pots in public and private gardens                                               |
| <i>Punica granatum</i> L., E, EE25154               | Granada     | Ornamental                                                       | Whole plant   | Planted in private gardens                                                                  |
|                                                     |             | Medicinal (gastro-intestinal system), diarrhea                   | Peel          | Boiled in water, drink the solution                                                         |
|                                                     |             | Food                                                             | Fruit         | Raw                                                                                         |
| MAGNOLIACEAE                                        |             |                                                                  |               |                                                                                             |
| <i>Magnolia grandiflora</i> L., N, EE25171          | Magnolia    | Ornamental, by its perennial folage and beautiful white flowers  | Whole plant   | Planted in public and private gardens                                                       |

## Continued Appendix A

| Scientific name                                 | Common name        | Uses (system)                                                            | Part used         | Method of use                                                                |
|-------------------------------------------------|--------------------|--------------------------------------------------------------------------|-------------------|------------------------------------------------------------------------------|
| <b>MALVACEAE</b>                                |                    |                                                                          |                   |                                                                              |
| <i>Alcea rosea</i> L., E, EE25357               | Malva rosa         | Ornamental, by its big and beautiful flowers                             | Whole plant       | Planted in private gardens                                                   |
| <i>Hibiscus denudatus</i> Benth., N, EE25174    | Hibisco            | Ornamental, by its beautiful flowers                                     | Whole plant       | Planted in private gardens                                                   |
| <i>Hibiscus syriacus</i> L., E, EE25417         | Malva              | Ornamental, by its beautiful flowers                                     | Whole plant       | Planted in private gardens                                                   |
| <i>Malva parviflora</i> L., N, EE25418          | Malva de patio     | Medicinal (circulatory system), varicose veins                           | Fruits and leaves | Boiled, drink the solution and chew and swallow the ground fruits and leaves |
| <i>Tilia mexicana</i> Schltdl., N, EE25419      | Tila               | Medicinal (nervous system) insomnia                                      | Dried flowers     | Boiled in water, drink the solution                                          |
|                                                 |                    | Ornamental                                                               | Whole plant       | Planted in private gardens by its majestic bearing                           |
|                                                 |                    |                                                                          |                   |                                                                              |
| <i>Sida rhombifolia</i> L., N, EE25420          | Hierba del cochino | Medicinal (gastro-intetinal system) diarrhea                             | Immature fruits   | Boiled in water, drink the infusion                                          |
| <b>MELIACEAE</b>                                |                    |                                                                          |                   |                                                                              |
| <i>Azadirachta indica</i> A.Juss., E, EEEE25265 | Neem (Nim)         | Medicinal (gastro-intestinal system), stomach pain, cramps, constipation | Bark              | Boiled in water, drink solution                                              |
| <i>Melia azedarach</i> L., E, EE25266           | Canelo             | Ornamental                                                               | Whole plant       | Planted in private gardens                                                   |
|                                                 |                    | Medicinal (dermic system), wound, skin irritation                        | Bark and leaves   | Boiled, the infusion used as cataplasm in the wounded area                   |
|                                                 |                    | Ornamental                                                               | Whole plant       | Planted in public and private gardens                                        |
| <b>MORACEAE</b>                                 |                    |                                                                          |                   |                                                                              |
| <i>Ficus carica</i> L., E, EE25268              | Higo               | Food                                                                     | Fruit             | Raw or boiled and canned fruit                                               |
|                                                 |                    | Ornamental                                                               | Whole plant       | Planted in private gardens                                                   |

## Continued Appendix A

| Scientific name                                    | Common name | Uses (system)                                    | Part used      | Method of use                          |
|----------------------------------------------------|-------------|--------------------------------------------------|----------------|----------------------------------------|
| <i>Morus celtidifolia</i> Kunth, N, EE25349        | Mora        | Medicinal (endocrin system), diabetes            | Fruits; leaves | Raw; leaves boiled, drink the infusion |
|                                                    |             | Medicinal (endocrin system), diabetes            | Fruits         | Boiled, drink the solution             |
|                                                    |             | Ornamental                                       | Whole plant    | Planted in public and private gardens  |
|                                                    |             | Food                                             | Fruits         | Raw                                    |
|                                                    |             | Dye                                              | Fruits         | Raw, squeezed                          |
| MORINGACEAE                                        |             |                                                  |                |                                        |
| <i>Moringa oleifera</i> Lam., E, EE25351           | Moringa     | Medicinal (endocrin system), diabetes            | Leaves         | Boiled, drin the infusion              |
| MUSSACEAE                                          |             |                                                  |                |                                        |
| <i>Mussa x oleifera</i> Lam., E, EE25415           | Plátano     | Food                                             | Fruit          | Raw                                    |
| MYRTACEAE                                          |             |                                                  |                |                                        |
| <i>Eucalyptus camaldulensis</i> Dehnh., E, EE25416 | Eucalipto   | Ornamental                                       | Whole plant    | Planted in private gardens             |
|                                                    |             | Medicinal (respiratory system), nasal congestion | Leaves         | Boiled, drink the infusion             |
|                                                    |             | Medicinal (nervous system) stress                | Leaves         | Boiled, drink the infusion             |
|                                                    | Guayaba     | Medicinal (gastro-intestinal system), fever      | Leaves         | Boiled, drink the infusion             |
|                                                    |             | Medicinal (gastro-intestinal system), diarrhea   | Fruit          | Raw, eat several fruits                |
|                                                    |             | Food                                             | Fruit          | Raw, and canned fruits                 |

## Continued Appendix A

| Scientific name                                                 | Common name | Uses (system)                                      | Part used                      | Method of use                           |
|-----------------------------------------------------------------|-------------|----------------------------------------------------|--------------------------------|-----------------------------------------|
| <i>Syzygium aromaticum</i> (L.) Merr. & L. M. Perry, E, EE25350 | Clavo       | Medicinal (endocrin system), diabetes              | Leaves                         | Boiled, drink the infusion              |
|                                                                 |             | Food (condiment)                                   | Floral buds (immature and dry) | Raw or bolied used in multiple ways     |
|                                                                 |             | Medicinal (gastro-intestinal system), constipation | Fruits                         | Boiled, drink the infusion or chewed    |
| NYCTAGINACEAE                                                   |             |                                                    |                                |                                         |
| <i>Bougainvillea spectabilis</i> Willd., N, EE25223             | Bugambilia  | Ornamental, by its showy flowers                   | Whole plant                    | Planted in public and private gardens   |
| <i>Mirabilis jalapa</i> L., N, EE25252                          | Maravilla   | Medicinal (respiratory system)                     | Bracts and flowers             | Boiled in water, drink the solution     |
|                                                                 |             | Ornamental, by its showy and besutiful flowers     | Whole plant                    | Planted in private gardens              |
| OLEACEAE                                                        |             |                                                    |                                |                                         |
| <i>Fraxinus americana</i> L., N, EE25255b                       | Fresno      | Ornamental                                         | Whole plant                    | Planted in public and private gardens   |
| <i>Fraxinus cuspidata</i> Torr., N, EE25255                     | Fresno      | Construction                                       | Wood                           | Dry, to make columns and bems of houses |
|                                                                 |             | Ornamental, by its beautiful flowers               | Whole plant                    | Planted in public and private gardens   |
| <i>Fraxinus greggi</i> A. Gray, N, EE25255c                     | Barretilla  | Ornamental                                         | Whole plant                    | Planted in public and private gardens   |
|                                                                 |             | Construction                                       | Wood                           | Dry, piles and columns for houses       |
|                                                                 |             | Fuel                                               | Wood                           | Dry                                     |
| <i>Jasminum floridum</i> Bunge, E, EE25372                      | Jazmín      | Ornamental                                         | Whole plant                    | Planted in private gardens              |
| <i>Jasminum officinale</i> L., E, EE25372b                      | Jazmin      |                                                    |                                |                                         |
| <i>Ligustrum japonicum</i> Thunb., E, EE25162                   | Trueno      | Ornamental                                         | Whole plant                    | Planted in public and private gardens   |

## Continued Appendix A

| Scientific name                                    | Common name      | Uses (system)                              | Part used   | Method of use                          |
|----------------------------------------------------|------------------|--------------------------------------------|-------------|----------------------------------------|
| ONAGRACEAE                                         |                  |                                            |             |                                        |
| <i>Oenothera rosea</i> L'Hér. ex Aiton, N, EE25413 | Hierba del golpe | Medicinal (dermic system), extenral wounds | Whole plant | Raw, milled, smear in the wounded area |
| PAPAVERACEAE                                       |                  |                                            |             |                                        |
| <i>Hunnemannia fumariifolia</i> Sweet, N, EE25348  | Amapola de campo | Ornamental, by its showy yellow flowers    | Whole plant | Planted in private gardens             |
| PINACEAE                                           |                  |                                            |             |                                        |
| <i>Pinus cembroides</i> Zucc., N, EE25353          | Piñonero         | Food                                       | Seeds       | Raw                                    |
|                                                    |                  | Fuel                                       | Wood        | Dry                                    |
|                                                    |                  | Ornamental                                 | Whole plant | Planted in private gardens             |
| <i>Pinus greggii</i> Engelm. ex Parl., N, EE25354  | Pino             | Fuel                                       | Wood        | Dry                                    |
|                                                    |                  | Ornamental                                 | Whole plant | Planted in private gardens             |
| <i>Pinus pseudostrobus</i> Lindl., N, EE25414      | Pino blanco      | Fuel                                       | Wood        | Dry                                    |
|                                                    |                  | Ornamental                                 | Whole plant | Planted in private gardens             |
|                                                    |                  | Rites-religious                            | Resin       | In prayer altars                       |
| PIPERACEAE                                         |                  |                                            |             |                                        |
| <i>Piper nigrum</i> L., E, EE25356                 | Pimienta         | Food (condiment)                           | Seeds       | Mixed with different meals             |
| PLANTAGINACEAE                                     |                  |                                            |             |                                        |
| <i>Antirrhinum majus</i> L., E, EE25459            | Perritos         | Ornamental, by its beautiful flowers       | Whole plant | Planted in private gardens             |
| <i>Plantago lanceolata</i> L., N, EE25458          | Llantés          | Medicinal (endocrin system), cancer        | Leaves      | Boiled in water, drink the infusion    |
| PLUMBAGINACEAE                                     |                  |                                            |             |                                        |
| <i>Plumbago pulchella</i> Boiss., E, EE25158       | Júdica           | Ornamental                                 | Whole plant | Planted in private gardens             |

## Continued Appendix A

| Scientific name                                          | Common name    | Uses (system)                                   | Part used               | Method of use                        |
|----------------------------------------------------------|----------------|-------------------------------------------------|-------------------------|--------------------------------------|
|                                                          |                | Medicinal (dermic system)                       | Stems and leaves        | Boiled, use the solution as catpalsm |
| <b>POLYGONACEAE</b>                                      |                |                                                 |                         |                                      |
| <i>Polygonum punctatum</i> Elliot, N, EE25407            | Chilillo       | Ornamental                                      | Whole plant             | Planted in private gardens           |
| <b>POACEAE</b>                                           |                |                                                 |                         |                                      |
| <i>Arundo donax</i> L., E, EE25408                       | Carrizo        | Religious-rites                                 | Stems                   | Religious ornaments                  |
|                                                          |                | Construction                                    | Stems                   | Roofs                                |
| <i>Avena sativa</i> L., E, EE25373                       | Avena          | Food                                            | Seeds                   | Raw or boiled                        |
| <i>Bambusa</i> sp., E, EE25374                           |                | Religious-rites                                 | Stems                   | Religious ornaments                  |
|                                                          |                | Construction                                    | Stems                   | Roofs                                |
| <i>Bouteloua curtipendula</i> (Michx.) Torr., N, EE25409 | Banderita      | Forage                                          | Whole plants            | Raw                                  |
| <i>Cymbopogon citratus</i> (DC.) Stapf, E, EE25410       | Zacate limón   | Ornamental                                      | Whole plant             | Planted in private gardens           |
|                                                          |                | Medicinal (gastron-intestinal system)           | Stems and leaves        | Boiled, drink the infusion           |
| <i>Sorghum bicolor</i> (L.) Moench, E, EE25411           | Sorgo          | Forage                                          | Whole plants            | Raw                                  |
| <i>Sorghum halepense</i> (L.) Pers., E, EE25412          | Zacate Johnson | Forage                                          | Whole plants            | Raw                                  |
| <i>Zea mays</i> L., N, EE25347                           | Maíz           | Food                                            | Fruits (seeds)          | Boiled or cooked with mutiple foods  |
|                                                          |                | Medicinal (gastro-intestinal system), parasites | Styles (female flowers) | Boiled in water, drink the solution  |
|                                                          |                | Medicinal (urinary system), kidney problems     | Seeds                   | Milled, boiled, drink the solution   |

## Continued Appendix A

| Scientific name                                  | Common name    | Uses (system)                                                             | Part used        | Method of use                                                              |
|--------------------------------------------------|----------------|---------------------------------------------------------------------------|------------------|----------------------------------------------------------------------------|
| PORTULACACEAE                                    |                |                                                                           |                  |                                                                            |
| Portulaca mundula I. M. Johnston, E, 25216       | Verdolaga      | Food                                                                      | Leaves and stems | Raw (previously disinfected with chlorine), or cooked with different foods |
|                                                  |                | Ornamental                                                                | Whole plant      | Planted in private gardens (pots)                                          |
| RANUNCULACEAE                                    |                |                                                                           |                  |                                                                            |
| Clematis drummondii Torr. & A.Gray, N, EE25405   | Barba de chivo | Ornamental                                                                | Whole plant      | Planted in private gardens                                                 |
| RHAMNACEAE                                       |                |                                                                           |                  |                                                                            |
| Colubrina greggii S.Watson, N                    | Colubrina      | Ornamental                                                                | Whole plant      | Planted in private gardens                                                 |
| ROSACEAE                                         |                |                                                                           |                  |                                                                            |
| Crataegus mexicana Moc. & Sessé ex DC., N, 25355 | Tejocote       | Medicinal (endocrin system), diabetes                                     | Fruit            | Raw or boiled, drink the fruit pulp                                        |
|                                                  |                | Medicinal (blood system)                                                  | Fruit            | Raw or boiled, drink the fruit pulp                                        |
| Cydonia oblonga Mill., E, EE25346                | Membrillo      | Food                                                                      | Fruit            | Raw or boiled to make canned fruits                                        |
| Eriobotrya japonica (Thunb.) Lindl., E, EE25406  | Níspero        | Food                                                                      | Fruit            | Raw                                                                        |
|                                                  |                | Medicinal (endocrin and blood system), diabetes and arterial hipertension | Fruit            | Raw, liquefied in water                                                    |
| Malus domestica Borkh., E, EE25343               | Manzana        | Food                                                                      | Fruit            | Raw                                                                        |
|                                                  |                | Food                                                                      | Canned fruits    | Boiled                                                                     |
|                                                  |                | Alcoholic beverages                                                       | Fruit            | Fermented                                                                  |
| Prunus armeniaca L., E, EE25344                  | Chabacano      | Food                                                                      | Fruit            | Raw                                                                        |
|                                                  |                | Ornamental                                                                | Whole plant      | Planted in private gardens                                                 |
| Prunus domestica L., E, EE25345                  | Ciruelo        | Food                                                                      | Fruit            | Raw                                                                        |

## Continued Appendix A

| Scientific name                                                     | Common name      | Uses (system)                                                  | Part used                             | Method of use                                                 |
|---------------------------------------------------------------------|------------------|----------------------------------------------------------------|---------------------------------------|---------------------------------------------------------------|
| <i>Prunus persica</i> (L.) Batsch, E, EE25150                       | Durazno          | Food                                                           | Fruit                                 | Raw                                                           |
|                                                                     |                  | Ornamental                                                     | Whole plant                           | Planted in private gardens                                    |
| <i>Purshia plicata</i> (D.Don) Henr., N, EE25460                    | Rosa de castilla | Medicinal (gastro-intestinal system),<br>diarrhea              | Leaves                                | Boiled, drink the solution                                    |
| <i>Rosa montezumae</i> Humb. & Bonpl. ex Redout & Thory, N, EE25461 | Rosa             | Ornamental                                                     | Whole plant                           | Planted in private gardens                                    |
| <b>RUTACEAE</b>                                                     |                  |                                                                |                                       |                                                               |
| <i>Casimiroa pringlei</i> (S. Wats.) Engl., N, EE25342              | Manguito         | Ornamental                                                     | Whole plant                           | Planted in public and private gardens                         |
| <i>Citrus limon</i> (L.) Osbeck, E, EE25404                         | Limón            | Food                                                           | Fruit                                 | Raw                                                           |
|                                                                     |                  | Food                                                           | Fruit                                 | Raw                                                           |
|                                                                     |                  | Medicinal (respiratory system), cough, chest pain, throat pain | Leaves and fruit juice                | Boiled, drink the solution                                    |
|                                                                     |                  | Ornamental                                                     | Whole plant                           | Planted private gardens                                       |
| <i>Citrus sinensis</i> (L.) Osbeck, E, EE25341                      | Naranja          | Food                                                           | Fruit                                 | Raw                                                           |
|                                                                     |                  | Medicinal (respiratory system), cough, chest pain, throat pain | Leaves and fruit peel and fruit juice | Boiled, drink the solution                                    |
|                                                                     |                  | Ornamental                                                     | Whole plant                           | Planted in public and private gardens                         |
|                                                                     |                  | Ornamental                                                     | Whole plant                           | Planted in public and private gardens                         |
| <i>Helietta parvifolia</i> (A. Gray) Benth., N, EE25215             | Barreta          | Construction                                                   | Wood                                  | Dry, piles and columns for houses, fences (very durable wood) |
|                                                                     |                  | Ornamental                                                     | Whole plant                           | Planted in public and private gardens                         |

## Continued Appendix A

| Scientific name                                                                          | Common name                | Uses (system)                                   | Part used           | Method of use                                                        |
|------------------------------------------------------------------------------------------|----------------------------|-------------------------------------------------|---------------------|----------------------------------------------------------------------|
| <i>Ruta graveolens</i> L., E, EE25221                                                    | Ruda                       | Medicinal (respiratory system), cold            | Leaves and stems    | Boiled                                                               |
| <i>Zanthoxylum fagara</i> (L.) Sarg., N, EE25247                                         | Colima                     | Construction                                    | Wood                | Dry, piles and columns for houses                                    |
|                                                                                          |                            | Forage                                          | Leaves              | Raw                                                                  |
|                                                                                          |                            | Medicinal (respiratory system), asthma          | Leaves              | Boiled, drink the solution                                           |
|                                                                                          |                            | Medicinal (skeletal-muscular system), arthritis | Leaves              | Boiled, drink the solution                                           |
| SALICACEAE                                                                               |                            |                                                 |                     |                                                                      |
| <i>Populus mexicana</i> Wesm. Ex DC., N, EE25248                                         | Álamo, chopo               | Ornamental                                      | Whole plant         | Planted in public and private gardens                                |
| <i>Salix nigra</i> Marshall, N, EE25462                                                  | Sauce                      | Ornamental                                      | Whole plant         | Planted in public and private gardens                                |
|                                                                                          |                            | Fuel                                            | Wood                | Dry                                                                  |
| SAPINDACEAE                                                                              |                            |                                                 |                     |                                                                      |
| <i>Koelreuteria paniculata</i> Laxm., E, EE25238                                         | Alfombrilla                | Ornamental, by its showy, psrsisten fruits      | Whole plant         | Planted in private gardens                                           |
| SCROPHULARIACEAE                                                                         |                            |                                                 |                     |                                                                      |
| <i>Leucophyllum frutescens</i> (Berland.) I. M. Johnst., N, EE25161                      | Cenizo                     | Medicinal (endocrin system), hepatitis          | Whole plant         | Cut into the pieces, boiled, drink and take a bath with the solution |
|                                                                                          |                            | Ornamental                                      | Whole plant         | Planted in public and private gardens                                |
|                                                                                          |                            | Religious-rites                                 | Branches and leaves | Part of the floral bouquets used in prayers and pilgrimages          |
| SOLANACEAE                                                                               |                            |                                                 |                     |                                                                      |
| <i>Capsicum annum</i> var. <i>glabriusculum</i> (Dunal) Heiser & Pickersgill, N, EE25217 | Chile piquín, chile quipín | Food (condiment)                                | Fruit               | Raw                                                                  |
|                                                                                          |                            | Ornamental                                      | Whole plant         | Planted in public and private gardens                                |

## Continued Appendix A

| Scientific name                                                                              | Common name                | Uses (system)                                       | Part used                        | Method of use                                                               |
|----------------------------------------------------------------------------------------------|----------------------------|-----------------------------------------------------|----------------------------------|-----------------------------------------------------------------------------|
| <i>Capsicum annum</i> var. <i>glabriusculum</i> (Dunal)<br>Heiser & Pickersgill, N, EE25217b | Chile japonés              | Medicinal (respiratory system), cough, phlegm       | Fruit (milled)                   | Liquefied in water, drink (very spicy drink)                                |
|                                                                                              |                            | Food (condiment)                                    | Fruit                            | Raw                                                                         |
|                                                                                              |                            | Ornamental                                          | Whole plant                      | Planted in public and private gardens                                       |
| <i>Capsicum annum</i> var. <i>glabriusculum</i> (Dunal)<br>Heiser & Pickersgill, N, EE25217c | Chile morrón               | Food (condiment)                                    | Fruit                            | Raw                                                                         |
| <i>Capsicum annum</i> var. <i>glabriusculum</i> (Dunal)<br>Heiser & Pickersgill, N, EE25217d | Chile jalapeño             | Food (condiment)                                    | Fruit                            | Raw                                                                         |
| <i>Capsicum annum</i> var. <i>glabriusculum</i> (Dunal)<br>Heiser & Pickersgill, N, EE25217e | Chile serrano              | Food (condiment)                                    | Fruit                            | Raw                                                                         |
| <i>Datura stramonium</i> L., N, EE25339                                                      | Toloache                   | Medicinal (respiratory system), cough, phlegm       | Fruit (milled)                   | Liquefied in water, drink (very spicy drink)                                |
|                                                                                              |                            | Falling in love                                     | Leaves and seeds                 | Leaves (boiled in water, drink the solution), seeds (raw, chew and swallow) |
| <i>Lycopersicon esculentum</i> Mill., E, EE25403                                             | Tomate                     | Food                                                | Fruit                            | Raw or cooked with other foods                                              |
|                                                                                              |                            | Medicinal (skeletal-muscular system), muscular pain | Fruit                            | Raw, pulp, use as cataplasm                                                 |
| <i>Physalis philadelphica</i> Lam., N, EE25260                                               | Tomate de fresadilla       | Food                                                | Fruit                            | Mixed with other foods, broths, sauces and stews                            |
| <i>Solanum ovigerum</i> Dunal, E, EE25463                                                    | Huevitos                   | Ornamental, by its fruits (egg-like)                | Whole plant                      | Planted in private gardens                                                  |
| <i>Solanum tuberosum</i> L., E, EE25464                                                      | Papa                       | Food                                                | Root                             | Mixed with other foods, broths, sauces and stews                            |
| <b>TURNERACEAE</b>                                                                           |                            |                                                     |                                  |                                                                             |
| <i>Turnera diffusa</i> Willd. ex Schult., N, EE25340                                         | Damiana, hierba del venado | Medicinal (genito-urinary system)                   | Leaves, stems and inflorescences | Boiled in water, drink the solution                                         |

## Continued Appendix A

| Scientific name                                                    | Common name | Uses (system)                                                 | Part used            | Method of use                                                                          |
|--------------------------------------------------------------------|-------------|---------------------------------------------------------------|----------------------|----------------------------------------------------------------------------------------|
| <b>URTICACEAE</b>                                                  |             | Forage                                                        | Whole plant          | Raw                                                                                    |
| <i>Urtica dioica</i> L., N, EE25402                                | Hiedra      | Medicinal (blood system), purify the blood                    | Whole plant          | Boiled in water, drink the solution                                                    |
| <b>VERBENCEAE</b>                                                  |             |                                                               |                      |                                                                                        |
| <i>Lippia graveolens</i> Kunth, N, EE25400                         | Orégano     | Food (condiment)                                              | Leaves               | Dry, added to different foods, broths and stews                                        |
| <i>Verbena canescens</i> Kunth, N, EE25401                         | Verbena     | Medicinal (nervous system), insomnia                          | Leaves and stems     | Boiled in water, drink solution, and bathe with the solution                           |
| <b>VITACEAE</b>                                                    |             |                                                               |                      |                                                                                        |
| <i>Parthenocissus quinquefolia</i> (L.) Planch., N, EE25160        | Viña virgen | Ornamental                                                    | Whole plant          | Planted in private gardens                                                             |
| <i>Vitis berlandieri</i> Planch., N, EE25338                       | Parra, vid  | Ornamental<br>Food                                            | Whole plant<br>Fruit | Planted in private gardens<br>Raw                                                      |
| <b>XANTHORRHOEACEAE</b>                                            |             |                                                               |                      |                                                                                        |
| <i>Aloe vera</i> (L.) Burm.f., E, EE25250                          | Sábila      | Medicinal (gastro-intestinal system), gastritis               | Leaves               | Pulp, milled, liquefied, drink the solution                                            |
|                                                                    |             | Medicinal (dermic system), hair restauration; dermical wounds | Leaves               | Pulp, smear the pulp all over the hair; raw, smear the milled pulp in the wounded area |
|                                                                    |             | Ornamental                                                    | Whole plant          | Planted in private gardens                                                             |
| <b>ZYGOPHYLLACEAE</b>                                              |             |                                                               |                      |                                                                                        |
| <i>Larrea tridentata</i> (Sessé & Moc. ex DC.) Coville, N, EE25399 | Gobernadora | Medicinal (gastro-intestinal system), spasms                  | Leaves               | Boiled in water, drink the solution                                                    |

## Continued Appendix A

| Scientific name                                                       | Common name | Uses (system)                                                        | Part used | Method of use                                             |
|-----------------------------------------------------------------------|-------------|----------------------------------------------------------------------|-----------|-----------------------------------------------------------|
| <b>ZINGIBERACEAE</b><br><i>Zingiber officinale</i> Roscoe, E, EE25398 | Jengibre    | Medicinal (dermic system), bad smell                                 | Leaves    | Boiled in water, wash bad smelling parts of the body      |
|                                                                       |             | Smelly feet                                                          | Leaves    | Dry, put leaves inside shoes                              |
|                                                                       |             | Cleaning the interior of car radiators                               | Leaves    | Boiled in water, drain the hot solution into the radiator |
|                                                                       |             | Food (condiment)                                                     | Root      | Raw, cut into the pieces                                  |
|                                                                       |             | Medicinal (gastro-intestinal system), intestinal inflammation, fever | Root      | Raw, iquefied, drink the solution                         |
|                                                                       |             | Medicinal (dermic system), external wounds                           | Root      | Raw, milled, smear in the wounded areas                   |
