# Supplementary material for: Ethnobotany in Iturbide, Nuevo León: The Traditional Knowledge on Plants Used in the Semiarid Mountains of Northeastern Mexico
Source: Preprints.org preprint supplement (doi:10.20944/preprints202208.0414.v1), 2022-08-24
Supplement: Supplementary file 2 [file supplementary › Table 1.docx]

**Table 1.** Number of families, genera, and species of plants used by residents of Iturbide, Nuevo León, Mexico, according to the interviewed. These plants were separated between eudicots, monocots, conifers and allies, and ferns and allies.

|  | **Eudicots** | **Monocots** | **Conifers and Allies** | **Ferns and Allies** | **TOTAL** |
| --- | --- | --- | --- | --- | --- |
| **Families** | 65 | 13 | 3 | 2 | 83 |
| **Genera** | 82 | 31 | 6 | 2 | 121 |
| **Species** | 204 | 34 | 10 | 2 | 250 |
