# Supplementary material for: Ethnobotany in Iturbide, Nuevo León: The Traditional Knowledge on Plants Used in the Semiarid Mountains of Northeastern Mexico
Source: Preprints.org preprint supplement (doi:10.20944/preprints202208.0414.v1), 2022-08-24
Supplement: Supplementary file 2 [file supplementary › Table 2.docx]

**Table 2.** Diversity of taxa with ethnobotanical applications recorded in northeastern (NE), northwestern (NW), central-west (CW) and southern (S) Mexico.

|  | **Location** | **Families** | **Genera** | **Species** | **Ecosystem** |
| --- | --- | --- | --- | --- | --- |
| **NE** Mexico | Iturbide, Nuevo León | 83 | 121 | 250 | Oak-pine, desert scrub |
| **NE** Mexico | Cumbres de Monterrey National Park (CMNP), Nuevo León; [34] | 69 | 170 | 240 | Oak-pine forest, and desert scrub |
| **NE** Mexico | Rayones, Nuevo León; [35] | 91 | 228 | 252 | Mainly desert scrub, and oak-pine forest |
| **NE** Mexico | Bustamante, Nuevo León; [26] | 66 | 176 | 218 | Desert scrub, oak-pine forest |
| **NE** Mexico | Cuatro Ciénegas, Coahuila; [6] | 57 | 132 | 158 | Desert scrub |
| **NW** Mexico | Sierra Juarez, Baja California; [36] | 27 | 39 | 48 | Desert homogeneous scrubland |
| **CW** Mexico | Monarch butterfly Biophere Reserve, Michoacán; [37] | 65 | 132 | 213 | Oak-pine, pine forest |
| **S** Mexico | Zapotitlán de las Salinas, Puebla; [38] | 79 | 219 | 298 | Different scrublands |
|  |  |  |  |  |  |
