# Supplementary material for: Ethnobotany in Iturbide, Nuevo León: The Traditional Knowledge on Plants Used in the Semiarid Mountains of Northeastern Mexico
Source: Preprints.org preprint supplement (doi:10.20944/preprints202208.0414.v1), 2022-08-24
Supplement: Supplementary file 2 [file supplementary › Table 3.docx]

**Table 3.** Category of use, number of species mentioned (*nt*), number of uses recorded (*nur*), and Informant Consensus Factor (*IFC*) of medicinal plants used in Iturbide, Nuevo León, Mexico. The roman numerals correspond to the WHO International Statistical Classification of Diseases and Related Health Problems (2006, [60]).

| **Category of use (system)** | **Number of species mentioned (*nt*)** | ***nur*** | **FIC** |
| --- | --- | --- | --- |
| Digestive (XI) | 29 | 259 | 0.89 |
| Respiratory (X) | 20 | 249 | 0.92 |
| Skin and subcutaneous (XII) | 17 | 38 | 0.57 |
| Endocrin (IV) | 16 | 74 | 0.79 |
| Circulatory (IX) | 13 | 73 | 0.83 |
| Nervous (VI) | 13 | 99 | 0.88 |
| Musculoskeletal (XIII) | 11 | 38 | 0.73 |
| Infectious (I) | 8 | 61 | 0.88 |
| Genitourinary (XIV) | 6 | 57 | 0.91 |
| Ophtalmic (VIII) | 3 | 22 | 0.90 |
