# Supplementary material for: Ethnobotany in Iturbide, Nuevo León: The Traditional Knowledge on Plants Used in the Semiarid Mountains of Northeastern Mexico
Source: Preprints.org preprint supplement (doi:10.20944/preprints202208.0414.v1), 2022-08-24
Supplement: Supplementary file 2 [file supplementary › Table 4.docx]

**Table 4.** Plant species with medicinal uses that obtained the highest *UVI* values in Iturbide, Nuevo León, Mexico. The letter ‘E’ and ‘N’ refer to the Exotic and Native origin of each species, respectively.

| **Scientific name** | **UVI** | **Origin** |
| --- | --- | --- |
| *Lepidium peruvianum* G.Chacón | 3 | E |
| *Ocimum basilicum* L. | 2.4 | E |
| *Rosmarinus officinalis* L. | 2.29 | E |
| *Mentha piperita* L. | 2.25 | E |
| *Cinnamomum verum* J.Presl. | 2.06 | E |
| *Plectranthus coleoides* Benth. | 2 | E |
| *Thymus vulgaris* L. | 2 | E |
| *Citrus sinensis* (L.) Osbeck | 2 | E |
| *Amphipterygium adstringens* (Schltdl.) Standl. | 2 | N |
| *Conyza filaginoides* (DC.) Hieron | 2 | N |
| *Taraxacum officinale* (L.) Weber ex F. H.Wigg. | 1.86 | E |
| *Psidium guajava* L. | 1.86 | N |
| *Syzygium aromaticum* (L.) Merr. & L. M. Perry | 1.75 | E |
| *Eucalyptus camaldulensis* Dehnh. | 1.73 | E |
| *Zea mays* L. | 1.72 | N |
