# Supplementary material for: Ethnobotany in Iturbide, Nuevo León: The Traditional Knowledge on Plants Used in the Semiarid Mountains of Northeastern Mexico
Source: Preprints.org preprint supplement (doi:10.20944/preprints202208.0414.v1), 2022-08-24
Supplement: Supplementary file 3 [file supplementary]

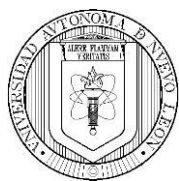

# UANL

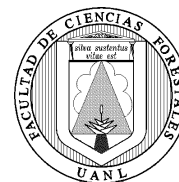

UNIVERSIDAD AUTÓNOMA DE NUEVO LEÓN

FACULTAD DE CIENCIAS FORESTALES

August 15, 2022

**Editor  
Sustainability  
Present**

On behalf of the co-authors of the manuscript: "Ethnobotany in Iturbide, Nuevo León: Traditional knowledge about plants used in the semi-arid mountains of northeastern Mexico." We expose, each one of the observations issued by the reviewers in the first and second round, have been carefully attended and are reflected in the document.

In general, they were carried out:

General text changes

Appointment Adjustments: the contribution of each one of the bibliographical references was verified, those that were considered non-significant for the work were eliminated. These have been reduced by a third of the original ones.

Writing in the Introduction and in the Materials and Methods section Adjustment in the discussion

Use of track changes, corrections from the first revision are marked in red, corrections from the second revision are marked in yellow

A style review was made in the English writing

**Reviewer 1**

**Response: First Review**

We appreciate the positive comments on the manuscript, extensive ethnographic and biological work was carried out for its development. We recognize the importance of documenting the ethnobotany of northeastern Mexico, one of the implications is the high richness of flora, associated with environmental heterogeneity, socioecologically to the relatively new (non-ancestral) profound knowledge of rural mestizo communities.

1. Sociocultural and socioeconomic information on the inhabitants of Iturbide, Nuevo León, Mexico was added to the study site section. Complementing the description made in the Introduction section.
2. The conceptual contexts on: ethnobotanical uses and ethnobotanical knowledge were modified, adding in the introduction in paragraph 2, from the integration of the Traditional Ecological Knowledge (TEK). To complement, as was the case in the rest of the writing, more appropriate synonyms were used.

**Reviewer 2**

**Response: First Review**

We appreciate the good comments of the Reviewer, it motivates us to correct this publication and to continue with the development of more works.

a) Figure 2 was edited

b) Previously, in figure 2, the obtaining of Prior and Informed Consent for taking photographs and for their publication had been added, under the ethical principles of the International Society of Ethnobiology 2006; <http://ethnobiology.net/codeofethics/>.

We improved the wording of the figure caption, expressing that during the taking of photographs the permission of the informants was obtained, as well as for its publication.

**Reviewer 3****Response: First Review**

The reviewer is thanked for his excellent comments, it motivates us to continue our research in a little explored area of Mexico and also full of socio-cultural conflicts. With a high diversity of flora derived from environmental heterogeneity. In addition, we are interested in the documentation of arid and semi-arid zones, as well as with mestizo rural inhabitants. We have found (in another work and in the present) the importance of ornamental plants, despite the conditions of solar radiation, the dedication of people to take care of these plants, and how through it, the categories of use are not static and change over time, and surely with globalization, displacing the two main categories of use, medicinal and edible.

**Reviewer 4****Response: First Review**

Each of the corrections mentioned by the reviewer have been made, we consider that each of the observations have improved the work for publication, we appreciate the work of the reviewer. Through your comments we made adjustments in various sections, contributing better to the discussion.

- a) A review of the suggested citations was made, to include them appropriately in the introduction, in addition others of interest were added to frame an introduction that highlights ethnobotanical work worldwide, in remote regions and with different indigenous groups.
- b) Changed the introduction and the section on materials and methods
- c) Figures were placed closer to their initial citation
- d) The term "species" was changed to "taxa" as long as the context allowed it.
- e) The order of the subtitles of the manuscript was modified.
- f) The new citations were added to the document and in the references section, each of the citations were reviewed in order of appearance in the text and in the list of references. Quotations that did not contribute to the text and the discussion were eliminated.
- g) All comments added in pdf format were addressed
- h) the work was left with changes control for the revision of the required observations

**Response: Second Review**

We appreciate each of the corrections and comments made, work, we strive to adjust each of them, none was rejected, on the contrary, your review work complements our research.

- a) Appendix A was added to the final part of the document.
- b) The corrections mentioned in the attached file were made
- c) The contribution of each of the authors in the investigation was added
- d) The contribution and significance of each of the citations was evaluated and those that were most important and contributed to strengthening the manuscript were selected.

Sincerely

**Eduardo Estrada C.**

PhD. Andrés Eduardo Estrada-Castillón  
Primary Author



PhD. Tania Vianney Gutiérrez-Santillán  
Corresponding Author
