# Supplementary figures and images for: Ethnobotany in Iturbide, Nuevo León: The Traditional Knowledge on Plants Used in the Semiarid Mountains of Northeastern Mexico
Source: Preprints.org preprint supplement (doi:10.20944/preprints202208.0414.v1), 2022-08-24

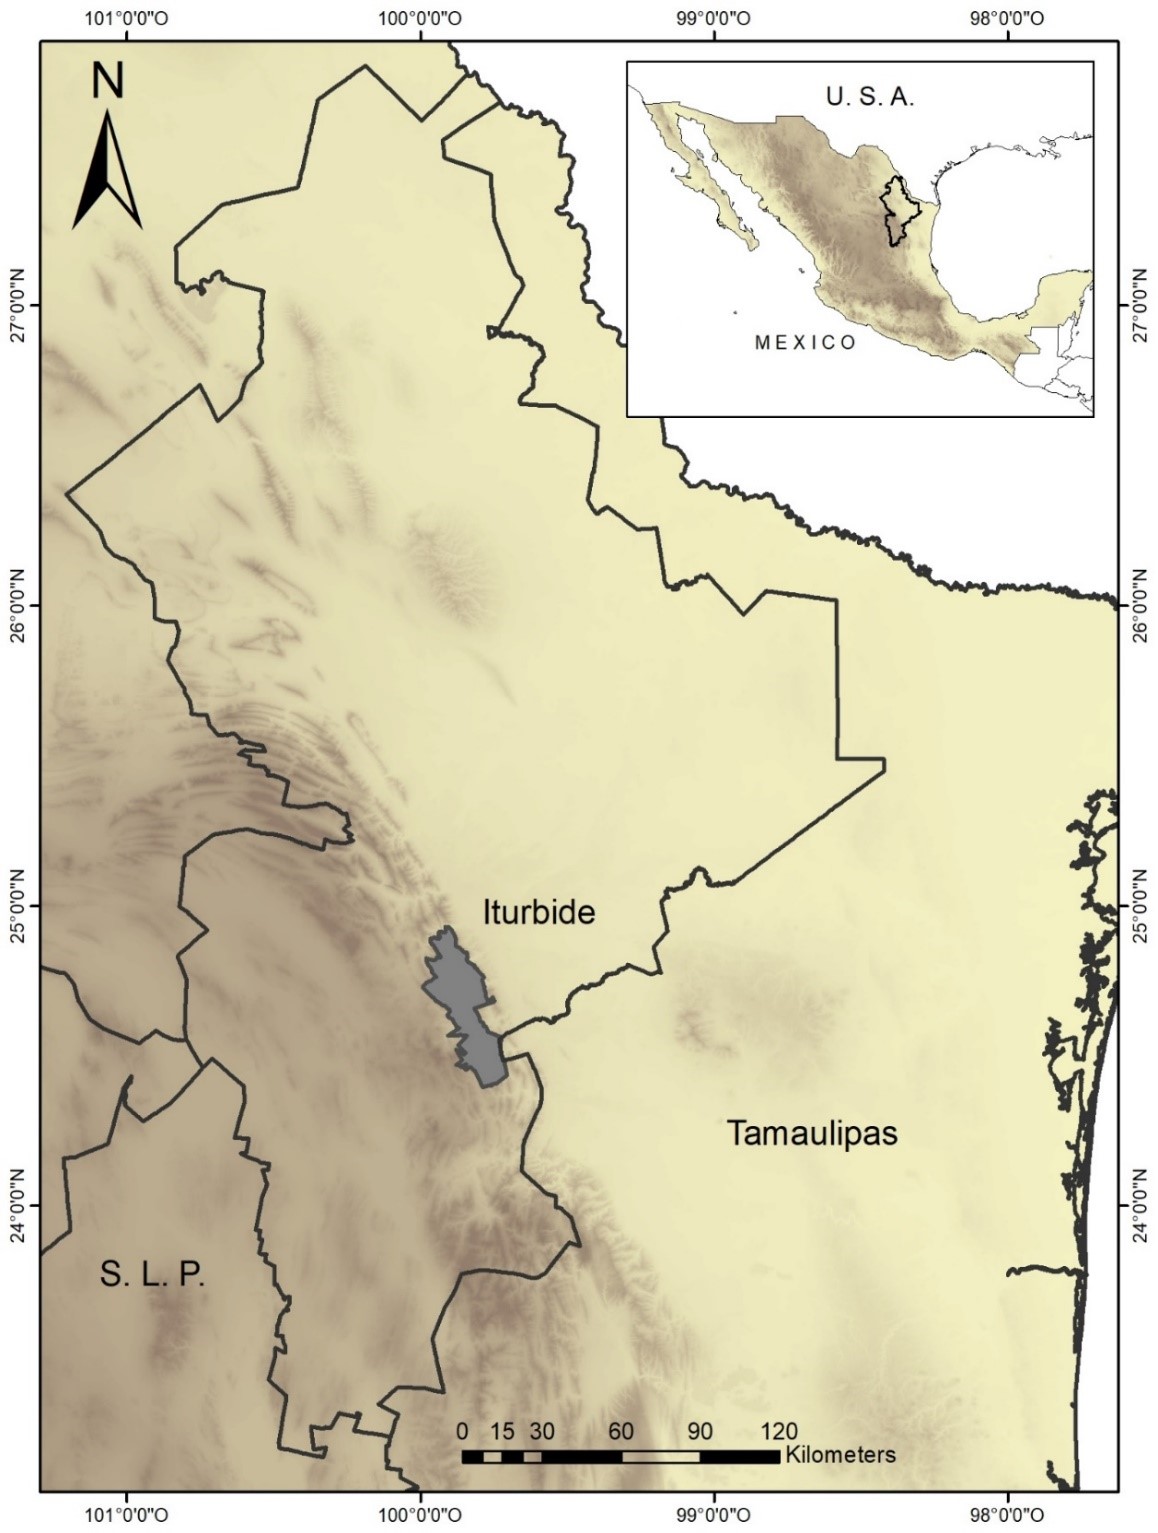

Supplement: Supplementary file 2 [file supplementary › figure 1.jpg]

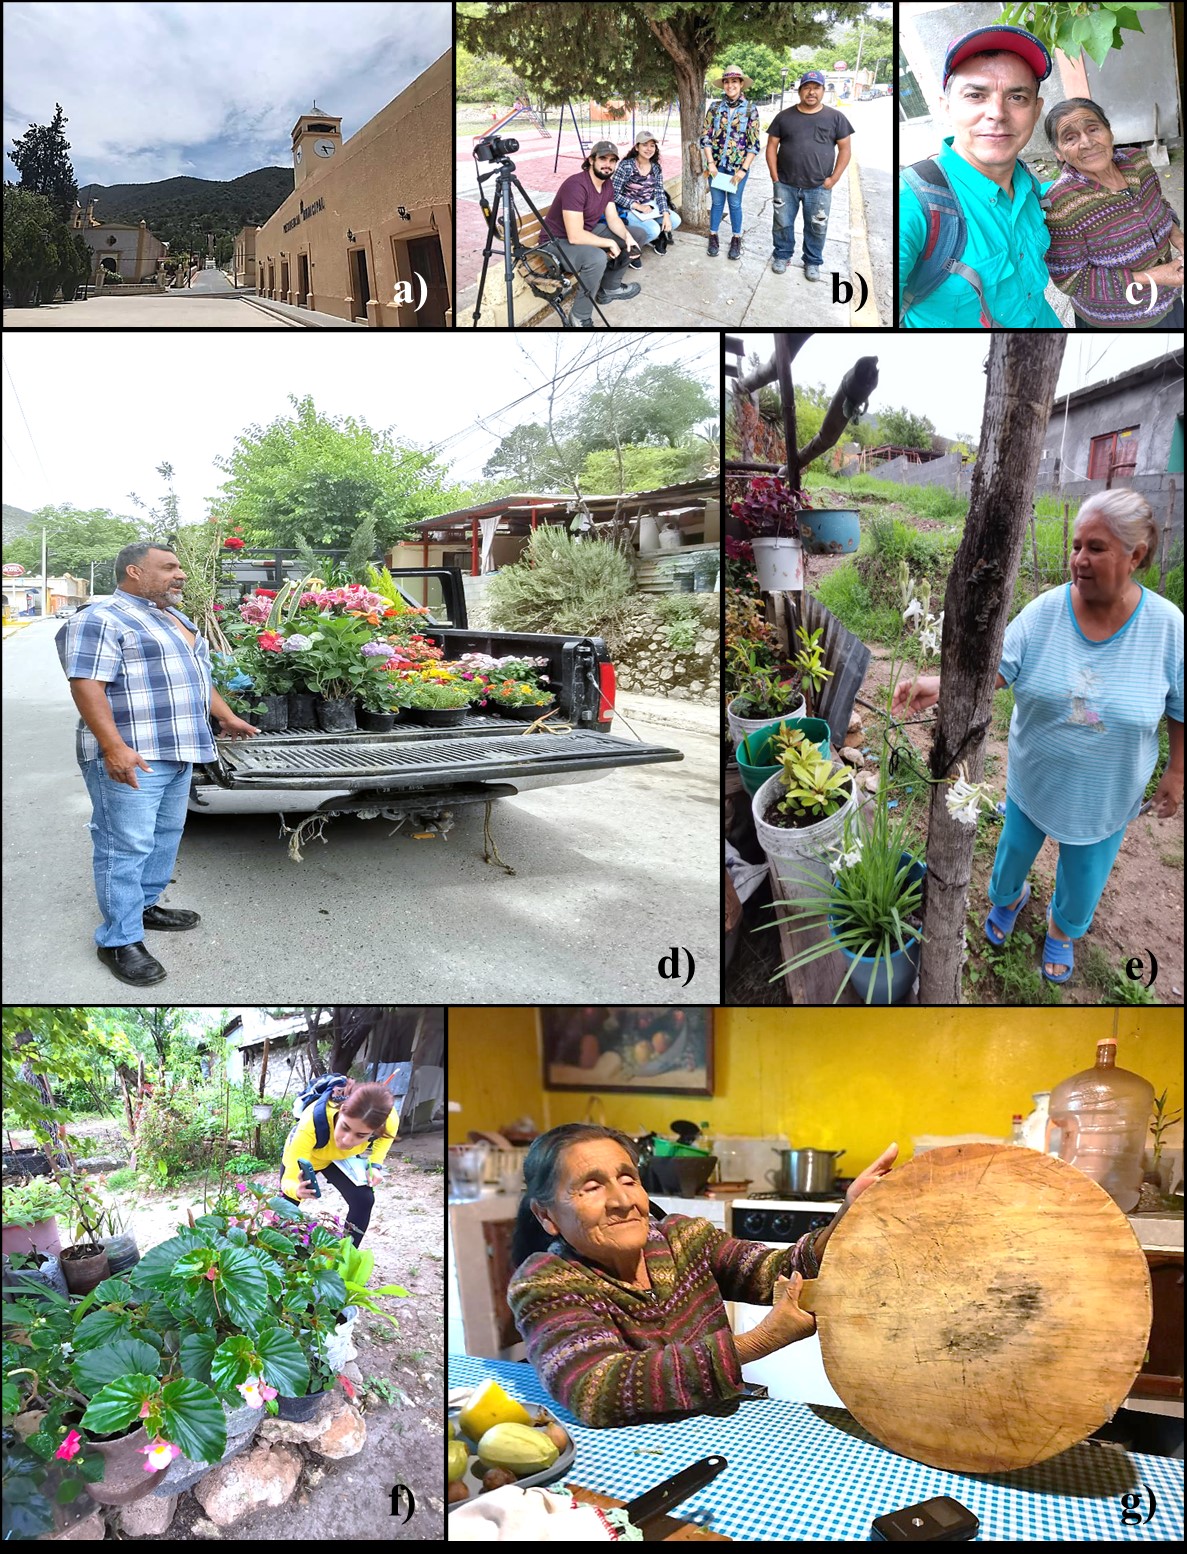

Supplement: Supplementary file 2 [file supplementary › figure 2.jpg]

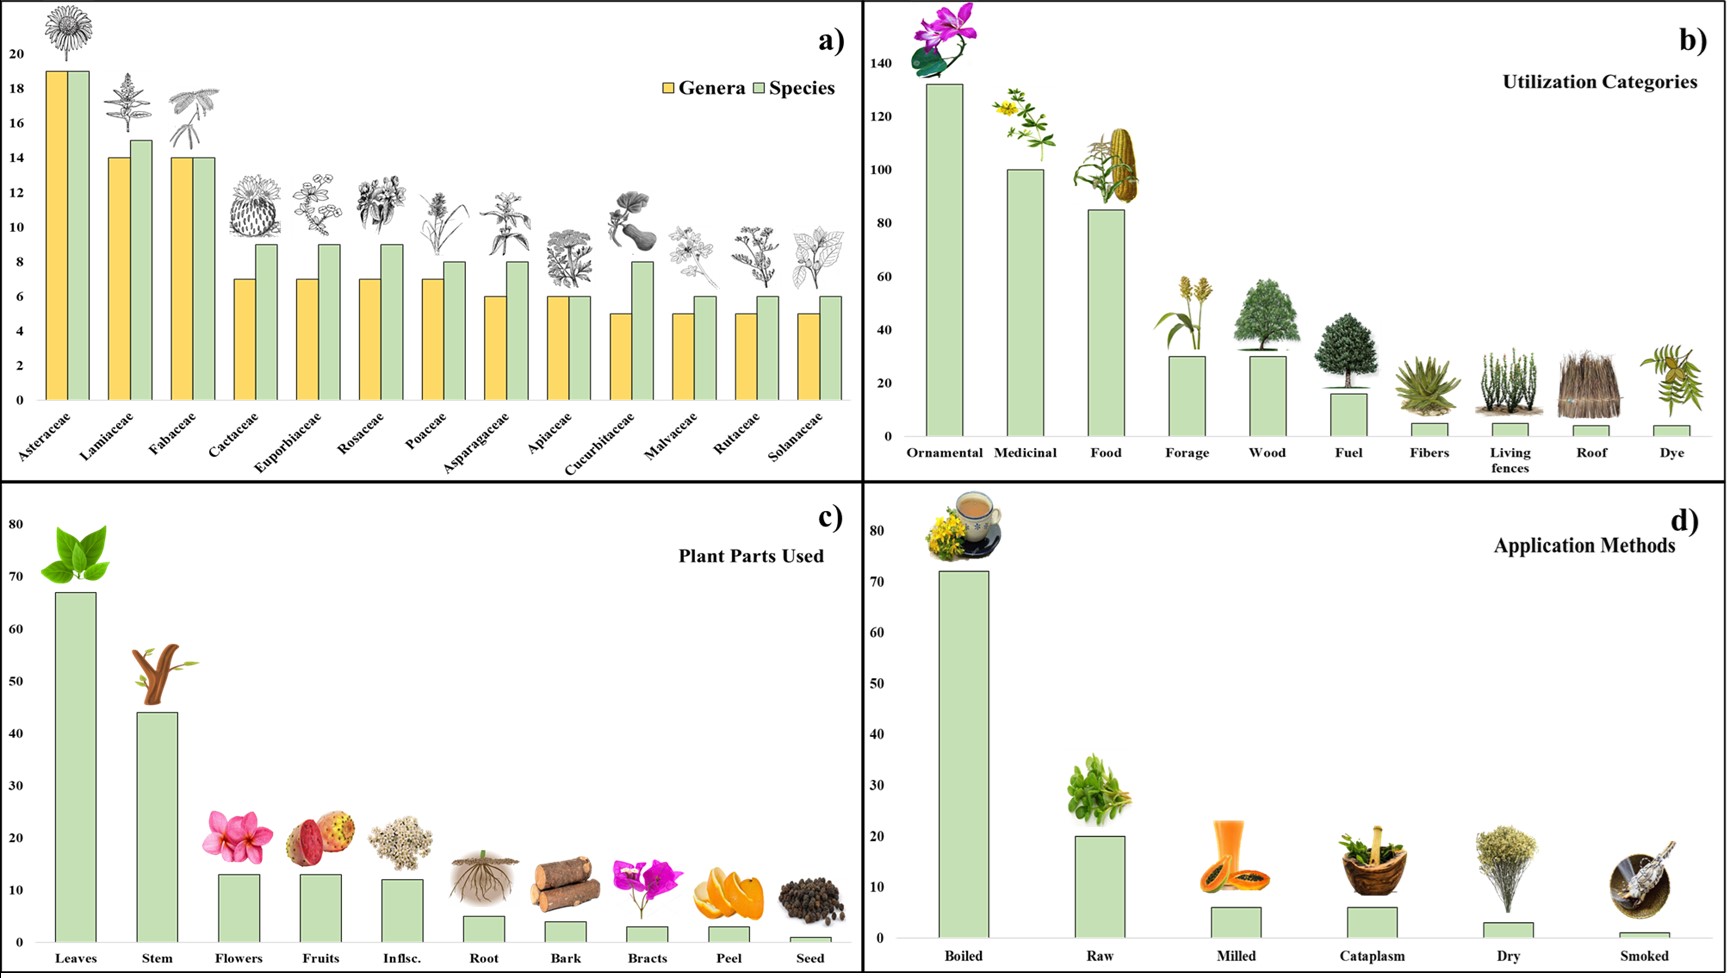

Supplement: Supplementary file 2 [file supplementary › figure 3.jpg]
